# Supplementary material for: Genome methylation and regulatory functions for hypoxic adaptation in Tibetan chicken embryos
Source: PeerJ. 2017 Oct 6;5:e3891. doi: 10.7717/peerj.3891 (PMC5633026; doi:10.7717/peerj.3891)
Supplement: Table S1 [file peerj-05-3891-s005.xlsx]

## Sheet: Sheet1
Table S1. The primers five DMGs and HPRT as a reference gene for qPCR
Ensemble Gene ID	Gene Name	Sequence of primer(5’-3’)	Product size(bp)	TM(℃)
ENSGALG00000012216	BMPR1B	F:AGTACCCAAGGCAAACCG	192	55
		R:ATCCAGCACCTCAGGAGG
ENSGALG00000014903	ITGA2	F:AGATTTGGCATTGCTGTT	166	56.5
		R:TACGCTCTCCGAGTGTTC
ENSGALG00000005806	KIF24	F:ATCAGCAGCAGCTGGATG	196	56.5
		R:AGGGATGTGTCGGGACTA
ENSGALG00000014691	PHAX	F:GTATGGAGGGCGATGTGG	134	56.5
		R:AATGCTGCTCTGGAAAGG
ENSGALG00000011336	TECRL	F:CCATACGGCACATCACAATA	243	55
		R:CGCTGGTCTTCCTCCTCCTG
ENSGALG00000006098	HPRT	F:CAACCTTGACTGGAAAGAATGT	171	55-65
		R:CAACAAAGTCTGGCCGATAT
