# Supplementary material for: Genome methylation and regulatory functions for hypoxic adaptation in Tibetan chicken embryos
Source: PeerJ. 2017 Oct 6;5:e3891. doi: 10.7717/peerj.3891 (PMC5633026; doi:10.7717/peerj.3891)
Supplement: Table S2 [file peerj-05-3891-s006.xlsx]

## Sheet: Sheet1
Table S2. A summary of the MeDIP-seq data
Sample	Raw data (bp)	Clean data (bp)	Effective rate	Q20	GC content
TC-1	5289682500	5075056250	0.9594	0.9266	0.4562
TC-2	5145565000	5010625500	0.9738	0.9444	0.4698
TC-3	5412473500	5281788750	0.9759	0.9491	0.4752
CH-1	4945415500	4772677000	0.9651	0.9268	0.4647
CH-2	5167999250	5023317250	0.972	0.9348	0.4597
CH-3	5258979250	5120630750	0.9737	0.9458	0.4658
TC: the Tibetan chicken; CH: the chahua chicken. The number adjacent to the breed name indicates the biological replicates.
