# Supplementary material for: Genome methylation and regulatory functions for hypoxic adaptation in Tibetan chicken embryos
Source: PeerJ. 2017 Oct 6;5:e3891. doi: 10.7717/peerj.3891 (PMC5633026; doi:10.7717/peerj.3891)
Supplement: Table S4 [file peerj-05-3891-s008.xlsx]

## Sheet: Sheet1
Table S4. A statistic of peaks on genome of the TC and CH
Sample	Total Peaks	Peak Mean Length	Peak Median Length	Peak Total Length	Peak Covered
					Size In Genome(%)
TC	103293	1338.04	1094	138210198	13.78
CH	107920	1417.53	1177	152979578	15.25
TC: the Tibetan chicken; CH: the chahua chicken.
