# Supplementary material for: Genome methylation and regulatory functions for hypoxic adaptation in Tibetan chicken embryos
Source: PeerJ. 2017 Oct 6;5:e3891. doi: 10.7717/peerj.3891 (PMC5633026; doi:10.7717/peerj.3891)
Supplement: Table S5 [file peerj-05-3891-s009.xlsx]

## Sheet: Sheet1
Table S5. The list of the 1049 DMRs and related 695 DMGs.
chr	start(peak)	end(peak)	reads_count(TC)	reads_count(CH)	LOG2(FC)	FDR	GeneID	Start,End,Length,OverlapNumber	region	Symbol	Pathway	GO Component	GO Function	GO Process
chrZ	65157962	65158858	476	33	3.85042	0	ENSGALG00000028441	6.51579e+21	CDS_up	-	-	-	-	-
chrZ	78313457	78316695	689	179	1.94454	0	ENSGALG00000028413	7.83164e+21	CDS_up	-	-	-	GO:0016849//phosphorus-oxygen lyase activity	GO:0009190//cyclic nucleotide biosynthetic process;GO:0035556//intracellular signal transduction
chrZ	78319697	78323589	476	118	2.01217	3.25482e-278	ENSGALG00000028413	7.83203e+21	CDS_up	-	-	-	GO:0016849//phosphorus-oxygen lyase activity	GO:0009190//cyclic nucleotide biosynthetic process;GO:0035556//intracellular signal transduction
chrZ	78317279	78319418	546	194	1.49284	3.54156e-220	ENSGALG00000028413	7.83181e+21	CDS_up	-	-	-	GO:0016849//phosphorus-oxygen lyase activity	GO:0009190//cyclic nucleotide biosynthetic process;GO:0035556//intracellular signal transduction
chrJH376216.1	3018	4180	105	0	#DIV/0!	2.40775e-181	ENSGALG00000029078	31093208100100	CDS_up	-	-	-	GO:0005515//protein binding	-
chrJH375443.1	1805	2838	261	65	2.00554	9.74177e-153	ENSGALG00000022430	22952713419419	CDS_up	-	-	-	-	-
chrJH376238.1	3677	5530	467	195	1.25995	2.00714e-149	ENSGALG00000022247	46064729124124	CDS_up	-	-	-	-	-
chrZ	73284057	73284588	224	47	2.25277	4.88173e-149	ENSGALG00000028445	73284169,73284255,87,87	CDS_up	-	-	-	GO:0016849//phosphorus-oxygen lyase activity;GO:0016849//phosphorus-oxygen lyase activity	GO:0009190//cyclic nucleotide biosynthetic process;GO:0035556//intracellular signal transduction;GO:0009190//cyclic nucleotide biosynthetic process;GO:0035556//intracellular signal transduction
chrZ	78309101	78312928	494	218	1.18018	4.9601e-144	ENSGALG00000028413	7.83126e+21	CDS_up	-	-	-	GO:0016849//phosphorus-oxygen lyase activity	GO:0009190//cyclic nucleotide biosynthetic process;GO:0035556//intracellular signal transduction
chrAADN03017457.1	1	655	123	10	3.62059	4.06505e-122	ENSGALG00000028674	259547289289	CDS_up	-	-	-	GO:0005515//protein binding	-
chrJH375348.1	2582	3755	421	190	1.14782	3.64939e-118	ENSGALG00000028919	26142793180180	CDS_up	-	-	-	GO:0008270//zinc ion binding;GO:0046872//metal ion binding;GO:0008270//zinc ion binding;GO:0046872//metal ion binding	-
chrAADN03018792.1	237	1713	454	224	1.01919	9.39505e-107	ENSGALG00000028844	1117,1214,98,98	CDS_up	WDR83OS	-	GO:0016020//membrane;GO:0016021//integral component of membrane	-	-
chrZ	7269261	7270136	131	21	2.64111	1.16191e-102	ENSGALG00000026912	7.26927e+19	CDS_up	-	-	GO:0005576//extracellular region;GO:0005615//extracellular space	GO:0005125//cytokine activity;GO:0005126//cytokine receptor binding	GO:0006952//defense response;GO:0051607//defense response to virus
chrJH375667.1	3804	5036	323	137	1.23736	2.39915e-101	ENSGALG00000025732	3807512813221230	CDS_up	-	-	-	-	-
chrAADN03024817.1	1566	2589	203	61	1.7346	1.80603e-100	ENSGALG00000027480	22882403116116	CDS_up	-	-	-	-	-
chrZ	7280266	7281755	239	85	1.49148	2.05382e-97	ENSGALG00000026689	7.28095e+19	CDS_up	-	ko04060//Cytokine-cytokine receptor interaction;ko05164//Influenza A;ko04630//Jak-STAT signaling pathway;ko05152//Tuberculosis;ko05160//Hepatitis C;ko05162//Measles;ko04620//Toll-like receptor signaling pathway;ko04650//Natural killer cell mediated cytotoxicity;ko04622//RIG-I-like receptor signaling pathway;ko04623//Cytosolic DNA-sensing pathway;ko05320//Autoimmune thyroid disease;ko04140//Regula…	GO:0005576//extracellular region;GO:0005615//extracellular space	GO:0005125//cytokine activity;GO:0005126//cytokine receptor binding;GO:0005132//type I interferon receptor binding	GO:0002250//adaptive immune response;GO:0002286//T cell activation involved in immune response;GO:0002323//natural killer cell activation involved in immune response;GO:0006952//defense response;GO:0006959//humoral immune response;GO:0019221//cytokine-mediated signaling pathway;GO:0030183//B cell differentiation;GO:0033141//positive regulation of peptidyl-serine phosphorylation of STAT protein;GO…
chr4	65755832	65756501	107	19	2.49354	7.32323e-80	ENSGALG00000013964	6.57562e+21	CDS_up	SPATA18	-	GO:0005741//mitochondrial outer membrane;GO:0043231//intracellular membrane-bounded organelle;GO:0005737//cytoplasm	GO:0005515//protein binding	GO:0033554//cellular response to stress;GO:0006974//cellular response to DNA damage stimulus;GO:0035695//mitochondrion degradation by induced vacuole formation;GO:0035694//mitochondrial protein catabolic process
chrAADN03021853.1	5630	6724	172	57	1.59337	8.39205e-77	ENSGALG00000011146	61316277147147	CDS_up	RECQL4	-	-	GO:0003676//nucleic acid binding;GO:0004386//helicase activity;GO:0005524//ATP binding	GO:0008152//metabolic process;GO:0008284//positive regulation of cell proliferation;GO:0001501//skeletal system development;GO:0043473//pigmentation;GO:0048705//skeletal system morphogenesis;GO:0045875//negative regulation of sister chromatid cohesion
chr3	60669441	60670033	130	33	1.97797	4.70222e-76	ENSGALG00000014864	6.06697e+21	CDS_up	SMPDL3A	-	GO:0005615//extracellular space;GO:0070062//extracellular vesicular exosome	GO:0004767//sphingomyelin phosphodiesterase activity;GO:0016787//hydrolase activity;GO:0005515//protein binding	GO:0006685//sphingomyelin catabolic process
chrJH375914.1	1119	1907	115	25	2.20163	9.30839e-76	ENSGALG00000028229	1429,1490,62,62	CDS_up	-	-	-	GO:0005515//protein binding	-
chrAADN03014788.1	1336	4373	160	51	1.6495	1.14177e-74	ENSGALG00000022278	14631588126126	CDS_up	MYO5C	-	GO:0070062//extracellular vesicular exosome	GO:0003774//motor activity;GO:0005524//ATP binding;GO:0051015//actin filament binding	GO:0008152//metabolic process
chrZ	68029899	68031745	248	109	1.18601	9.02607e-74	ENSGALG00000026659	6.80301e+21	CDS_up	-	-	-	GO:0005488//binding	-
chrAADN03025979.1	2536	6125	172	61	1.49553	8.85512e-71	ENSGALG00000018582	28593054196196	CDS_up	-	-	-	-	-
chrJH375961.1	3	1001	116	28	2.05063	1.15006e-70	ENSGALG00000027939	407714308308	CDS_up	-	-	-	GO:0005515//protein binding;GO:0005515//protein binding;GO:0005515//protein binding	-
chrAADN03021853.1	1	1205	205	83	1.30444	6.99923e-70	ENSGALG00000011146	588907320320	CDS_up	RECQL4	-	-	GO:0003676//nucleic acid binding;GO:0004386//helicase activity;GO:0005524//ATP binding	GO:0008152//metabolic process;GO:0008284//positive regulation of cell proliferation;GO:0001501//skeletal system development;GO:0043473//pigmentation;GO:0048705//skeletal system morphogenesis;GO:0045875//negative regulation of sister chromatid cohesion
chr3	59533608	59534433	98	19	2.36678	8.91726e-70	ENSGALG00000014843	59533815,59533875,61,61	CDS_up	TPD52L1	-	GO:0005737//cytoplasm;GO:0048471//perinuclear region of cytoplasm	GO:0042802//identical protein binding;GO:0005515//protein binding;GO:0042803//protein homodimerization activity;GO:0046982//protein heterodimerization activity	GO:0046330//positive regulation of JNK cascade;GO:0000086//G2/M transition of mitotic cell cycle;GO:2001235//positive regulation of apoptotic signaling pathway;GO:0043281//regulation of cysteine-type endopeptidase activity involved in apoptotic process;GO:0043406//positive regulation of MAP kinase activity
chr7	4354711	4355517	156	53	1.55748	1.0457e-67	ENSGALG00000003578	4.35501e+19	CDS_up	FN1	ko05200//Pathways in cancer;ko04810//Regulation of actin cytoskeleton;ko04510//Focal adhesion;ko05146//Amoebiasis;ko05222//Small cell lung cancer;ko04512//ECM-receptor interaction;ko05100//Bacterial invasion of epithelial cells	GO:0005576//extracellular region;GO:0031012//extracellular matrix;GO:0005615//extracellular space;GO:0070062//extracellular vesicular exosome;GO:0072562//blood microparticle;GO:0005577//fibrinogen complex;GO:0005793//endoplasmic reticulum-Golgi intermediate compartment;GO:0005604//basement membrane;GO:0016324//apical plasma membrane;GO:0005605//basal lamina;GO:0005576//extracellular region	GO:0005515//protein binding;GO:0002020//protease binding;GO:0005178//integrin binding;GO:0016504//peptidase activator activity;GO:0005515//protein binding	GO:0018149//peptide cross-linking;GO:0035987//endodermal cell differentiation;GO:0034446//substrate adhesion-dependent cell spreading;GO:0033622//integrin activation;GO:0045773//positive regulation of axon extension;GO:0042060//wound healing;GO:0007155//cell adhesion;GO:0007160//cell-matrix adhesion;GO:0007044//cell-substrate junction assembly;GO:0010952//positive regulation of peptidase activity…
chrZ	10851952	10852655	190	75	1.34104	2.48295e-67	ENSGALG00000003558	1.08522e+21	CDS_up	NADK2	-	GO:0005739//mitochondrion	GO:0003951//NAD+ kinase activity;GO:0042803//protein homodimerization activity	GO:0006741//NADP biosynthetic process;GO:0008152//metabolic process;GO:0016310//phosphorylation;GO:0019674//NAD metabolic process
chr4	33498516	33499426	112	28	2	2.15697e-66	ENSGALG00000010119	33498506,33498596,91,81	CDS_up	CDKL2	-	-	GO:0000166//nucleotide binding;GO:0004672//protein kinase activity;GO:0004674//protein serine/threonine kinase activity;GO:0005524//ATP binding;GO:0016772//transferase activity, transferring phosphorus-containing groups;GO:0004713//protein tyrosine kinase activity	GO:0006468//protein phosphorylation
chrAADN03024745.1	1	816	131	40	1.71149	2.34165e-64	ENSGALG00000013973	72441370370	CDS_up	-	-	-	-	-
chrZ	69550716	69551269	169	65	1.37851	2.529e-62	ENSGALG00000026501	6.95511e+21	CDS_up	-	-	-	-	-
chrAADN03022644.1	202	1012	104	27	1.94555	5.42858e-60	ENSGALG00000027755	104351248150	CDS_up	-	-	-	-	-
chrJH376400.1	84428	85379	131	43	1.60716	2.23396e-59	ENSGALG00000027325	8503685159124120	CDS_up	-	-	-	GO:0005515//protein binding;GO:0005515//protein binding	-
chr6	29530683	29531433	116	36	1.68806	2.52672e-56	ENSGALG00000009328	2.95309e+21	CDS_up	EIF3A	ko03013//RNA transport	GO:0005737//cytoplasm;GO:0005852//eukaryotic translation initiation factor 3 complex;GO:0016282//eukaryotic 43S preinitiation complex;GO:0033290//eukaryotic 48S preinitiation complex;GO:0005730//nucleolus;GO:0016020//membrane;GO:0005634//nucleus;GO:0071541//eukaryotic translation initiation factor 3 complex, eIF3m	GO:0003743//translation initiation factor activity;GO:0005515//protein binding	GO:0001731//formation of translation preinitiation complex;GO:0006412//translation;GO:0006413//translational initiation;GO:0006446//regulation of translational initiation;GO:0001732//formation of translation initiation complex
chr27	4342106	4343023	187	82	1.18934	4.66243e-56	ENSGALG00000000270	4342652,4342704,53,53	CDS_up	THRA	ko04080//Neuroactive ligand-receptor interaction	GO:0005634//nucleus;GO:0005829//cytosol;GO:0005737//cytoplasm	GO:0003700//sequence-specific DNA binding transcription factor activity;GO:0003707//steroid hormone receptor activity;GO:0003677//DNA binding;GO:0004887//thyroid hormone receptor activity;GO:0008270//zinc ion binding;GO:0043565//sequence-specific DNA binding;GO:0046872//metal ion binding;GO:0005515//protein binding;GO:0017025//TBP-class protein binding;GO:0019904//protein domain specific binding;…	GO:0006351//transcription, DNA-templated;GO:0006355//regulation of transcription, DNA-templated;GO:0043401//steroid hormone mediated signaling pathway;GO:0006366//transcription from RNA polymerase II promoter;GO:0006357//regulation of transcription from RNA polymerase II promoter;GO:0045892//negative regulation of transcription, DNA-templated;GO:0009755//hormone-mediated signaling pathway;GO:2000…
chr5	5343086	5344758	166	68	1.28758	5.91702e-56	ENSGALG00000012121	5.34421e+19	CDS_up	RCN1	-	GO:0005783//endoplasmic reticulum	GO:0005509//calcium ion binding;GO:0005515//protein binding	GO:0043010//camera-type eye development
chr10	16920787	16921595	121	40	1.59694	1.13124e-54	ENSGALG00000021874	1.69213e+21	CDS_up	-	-	-	-	-
chr5	50499749	50500626	95	25	1.926	3.25327e-54	ENSGALG00000011565	50500281,50500327,47,47	CDS_up	TDRD9	-	GO:0005634//nucleus;GO:0071547//piP-body	GO:0000166//nucleotide binding;GO:0003676//nucleic acid binding;GO:0004386//helicase activity;GO:0005524//ATP binding;GO:0016787//hydrolase activity;GO:0005515//protein binding	GO:0007283//spermatogenesis;GO:0009566//fertilization;GO:0007140//male meiosis;GO:0043046//DNA methylation involved in gamete generation;GO:0034587//piRNA metabolic process
chrZ	9335424	9336131	148	60	1.30256	7.92042e-51	ENSGALG00000002854	9335738,9335819,82,82	CDS_up	PDZD2	-	GO:0005737//cytoplasm	GO:0005515//protein binding	-
chrAADN03012208.1	1	1360	189	89	1.08651	5.55507e-50	ENSGALG00000026765	513615103103	CDS_up	CPNE5	-	GO:0070062//extracellular vesicular exosome;GO:0043025//neuronal cell body;GO:0043005//neuron projection	-	-
chrZ	20454336	20455378	154	65	1.24442	1.31223e-49	ENSGALG00000014765	2.04546e+21	CDS_up	TRIM23	-	GO:0005622//intracellular;GO:0005634//nucleus;GO:0005737//cytoplasm;GO:0070062//extracellular vesicular exosome;GO:0000139//Golgi membrane;GO:0005765//lysosomal membrane	GO:0000166//nucleotide binding;GO:0005525//GTP binding;GO:0008270//zinc ion binding;GO:0046872//metal ion binding;GO:0003924//GTPase activity;GO:0004871//signal transducer activity;GO:0019001//guanyl nucleotide binding;GO:0031683//G-protein beta/gamma-subunit complex binding;GO:0005515//protein binding;GO:0042802//identical protein binding;GO:0004842//ubiquitin-protein ligase activity;GO:0019003/…	GO:0007264//small GTPase mediated signal transduction;GO:0007186//G-protein coupled receptor signaling pathway;GO:0015031//protein transport;GO:0006886//intracellular protein transport
chr3	17142704	17143491	127	48	1.40372	1.88423e-48	ENSGALG00000009388	1.7143e+21	CDS_up	SUSD4	-	-	-	-
chrZ	9913678	9914548	116	41	1.50043	2.00364e-48	ENSGALG00000017405	9913667,9913761,95,84	CDS_up	NPR3	-	GO:0016020//membrane;GO:0016021//integral component of membrane;GO:0070062//extracellular vesicular exosome	GO:0042562//hormone binding;GO:0016941//natriuretic peptide receptor activity	GO:0001501//skeletal system development;GO:0008217//regulation of blood pressure;GO:0002158//osteoclast proliferation;GO:0035810//positive regulation of urine volume;GO:0033688//regulation of osteoblast proliferation
chr3	108482427	108483274	103	34	1.59904	8.16356e-47	ENSGALG00000016704	1.08482e+23	CDS_up	CDC5L	ko03040//Spliceosome	GO:0005730//nucleolus;GO:0016020//membrane;GO:0005634//nucleus;GO:0000974//Prp19 complex;GO:0005662//DNA replication factor A complex;GO:0071013//catalytic step 2 spliceosome;GO:0016607//nuclear speck	GO:0003677//DNA binding;GO:0003682//chromatin binding;GO:0005515//protein binding;GO:0071987//WD40-repeat domain binding	GO:0072422//signal transduction involved in DNA damage checkpoint
chrJH376306.1	4434	5288	129	51	1.3388	3.84981e-46	ENSGALG00000026720	43894700312267	CDS_up	-	-	-	GO:0005515//protein binding	-
chr9	9969342	9970136	151	66	1.19401	4.39567e-46	ENSGALG00000002663	9.96992e+19	CDS_up	ATR	-	GO:0016605//PML body;GO:0001741//XY body	GO:0000166//nucleotide binding;GO:0004674//protein serine/threonine kinase activity;GO:0005524//ATP binding;GO:0016301//kinase activity;GO:0016740//transferase activity;GO:0016772//transferase activity, transferring phosphorus-containing groups;GO:0016773//phosphotransferase activity, alcohol group as acceptor;GO:0005515//protein binding;GO:0005488//binding;GO:0004672//protein kinase activity;GO:…	GO:0016310//phosphorylation;GO:0090399//replicative senescence;GO:0008156//negative regulation of DNA replication;GO:0046777//protein autophosphorylation;GO:0000077//DNA damage checkpoint;GO:0071480//cellular response to gamma radiation;GO:0043517//positive regulation of DNA damage response, signal transduction by p53 class mediator;GO:0034644//cellular response to UV;GO:0018105//peptidyl-serine …
chrZ	71555845	71556618	107	37	1.53201	6.73074e-46	ENSGALG00000002227	7.15564e+21	CDS_up	DMXL1	-	-	GO:0005515//protein binding	-
chr8	26423345	26424366	139	58	1.26096	8.17638e-46	ENSGALG00000010967	2.64239e+21	CDS_up	DOCK7	-	GO:0008180//COP9 signalosome;GO:0005925//focal adhesion	GO:0005085//guanyl-nucleotide exchange factor activity;GO:0005488//binding;GO:0048365//Rac GTPase binding	GO:0007264//small GTPase mediated signal transduction;GO:0007409//axonogenesis;GO:0033138//positive regulation of peptidyl-serine phosphorylation;GO:0000226//microtubule cytoskeleton organization;GO:0045200//establishment of neuroblast polarity;GO:0032863//activation of Rac GTPase activity;GO:0031175//neuron projection development;GO:0002244//hematopoietic progenitor cell differentiation;GO:00434…
chr6	21844692	21845951	172	81	1.08641	1.2333e-45	ENSGALG00000007531	2.18455e+21	CDS_up	ZFYVE27	-	GO:0005783//endoplasmic reticulum;GO:0005737//cytoplasm;GO:0030425//dendrite;GO:0030424//axon;GO:0032584//growth cone membrane	GO:0046872//metal ion binding;GO:0005515//protein binding;GO:0046872//metal ion binding	GO:0031175//neuron projection development
chr4	11439206	11440330	177	85	1.05821	4.16795e-45	ENSGALG00000007574	1.14395e+21	CDS_up	-	-	GO:0005634//nucleus;GO:0005737//cytoplasm	GO:0005525//GTP binding	GO:0007264//small GTPase mediated signal transduction
chrZ	54577026	54577803	141	60	1.23266	5.84017e-45	ENSGALG00000015433	5.45774e+21	CDS_up	ABCA1	ko04975//Fat digestion and absorption;ko02010//ABC transporters	GO:0005887//integral component of plasma membrane;GO:0005886//plasma membrane;GO:0048471//perinuclear region of cytoplasm;GO:0045121//membrane raft;GO:0045335//phagocytic vesicle;GO:0030139//endocytic vesicle;GO:0009897//external side of plasma membrane;GO:0005794//Golgi apparatus;GO:0043231//intracellular membrane-bounded organelle	GO:0000166//nucleotide binding;GO:0005524//ATP binding;GO:0016887//ATPase activity;GO:0017111//nucleoside-triphosphatase activity;GO:0000166//nucleotide binding;GO:0005524//ATP binding;GO:0016887//ATPase activity;GO:0017111//nucleoside-triphosphatase activity;GO:0005515//protein binding;GO:0005102//receptor binding;GO:0017127//cholesterol transporter activity;GO:0019905//syntaxin binding;GO:00341…	GO:0006200//ATP catabolic process;GO:0008152//metabolic process;GO:0006200//ATP catabolic process;GO:0007186//G-protein coupled receptor signaling pathway;GO:0016197//endosomal transport;GO:0043691//reverse cholesterol transport;GO:0008203//cholesterol metabolic process;GO:0042632//cholesterol homeostasis;GO:0007040//lysosome organization;GO:0060155//platelet dense granule organization;GO:0055098…
chr5	35413622	35414456	189	94	1.00765	9.67806e-45	ENSGALG00000010054	3.54143e+21	CDS_up	-	-	-	-	-
chr10	3120606	3122118	152	68	1.16046	1.81886e-44	ENSGALG00000003014	3122061,3122115,55,55	CDS_up	CHRNA3	ko04080//Neuroactive ligand-receptor interaction;ko04725//Cholinergic synapse	GO:0005886//plasma membrane;GO:0016020//membrane;GO:0016021//integral component of membrane;GO:0030054//cell junction;GO:0045202//synapse;GO:0045211//postsynaptic membrane;GO:0005892//acetylcholine-gated channel complex;GO:0005886//plasma membrane;GO:0016020//membrane;GO:0016021//integral component of membrane;GO:0030054//cell junction;GO:0045202//synapse;GO:0045211//postsynaptic membrane	GO:0004889//acetylcholine-activated cation-selective channel activity;GO:0005216//ion channel activity;GO:0005230//extracellular ligand-gated ion channel activity;GO:0015464//acetylcholine receptor activity;GO:0005515//protein binding;GO:0004889//acetylcholine-activated cation-selective channel activity;GO:0005216//ion channel activity;GO:0005230//extracellular ligand-gated ion channel activity	GO:0006810//transport;GO:0006811//ion transport;GO:0006812//cation transport;GO:0034220//ion transmembrane transport;GO:0007165//signal transduction;GO:0007399//nervous system development;GO:0060084//synaptic transmission involved in micturition;GO:0035095//behavioral response to nicotine;GO:0007626//locomotory behavior;GO:0042391//regulation of membrane potential;GO:0048814//regulation of dendri…
chr14	6927170	6927996	105	37	1.50479	4.1285e-44	ENSGALG00000006156	6.92784e+19	CDS_up	COG7	-	GO:0017119//Golgi transport complex;GO:0005794//Golgi apparatus	GO:0005515//protein binding	GO:0006886//intracellular protein transport;GO:0050821//protein stabilization;GO:0006486//protein glycosylation;GO:0006890//retrograde vesicle-mediated transport, Golgi to ER;GO:0033365//protein localization to organelle;GO:0034067//protein localization to Golgi apparatus
chr5	7366522	7367474	147	65	1.1773	6.61436e-44	ENSGALG00000005438	7.36658e+19	CDS_up	PARVA	ko04510//Focal adhesion	GO:0005737//cytoplasm;GO:0005925//focal adhesion;GO:0015629//actin cytoskeleton;GO:0005634//nucleus;GO:0030027//lamellipodium	GO:0003779//actin binding;GO:0005515//protein binding	GO:0007155//cell adhesion;GO:0031532//actin cytoskeleton reorganization;GO:0060271//cilium morphogenesis;GO:0034446//substrate adhesion-dependent cell spreading;GO:0002040//sprouting angiogenesis;GO:0007163//establishment or maintenance of cell polarity;GO:0003148//outflow tract septum morphogenesis;GO:0034113//heterotypic cell-cell adhesion;GO:0070252//actin-mediated cell contraction;GO:0071670/…
chr15	4931526	4932416	138	59	1.22588	1.30308e-43	ENSGALG00000023683	4.93148e+19	CDS_up	TCTN2	-	-	-	-
chr3	16575959	16576919	138	59	1.22588	1.30308e-43	ENSGALG00000009291	1.65764e+21	CDS_up	EPHX1	ko04976//Bile secretion;ko00980//Metabolism of xenobiotics by cytochrome P450	-	GO:0003824//catalytic activity;GO:0033961//cis-stilbene-oxide hydrolase activity	GO:0014070//response to organic cyclic compound;GO:0006725//cellular aromatic compound metabolic process
chrLGE22C19W28_E50C23	900397	901149	106	39	1.44252	4.9492e-42	ENSGALG00000006665	9.00393e+17	CDS_up	GALNT6	ko01100//Metabolic pathways;ko00512//Mucin type O-Glycan biosynthesis	GO:0005794//Golgi apparatus;GO:0016020//membrane;GO:0016021//integral component of membrane;GO:0048471//perinuclear region of cytoplasm	GO:0004653//polypeptide N-acetylgalactosaminyltransferase activity;GO:0016740//transferase activity;GO:0016757//transferase activity, transferring glycosyl groups;GO:0046872//metal ion binding;GO:0004653//polypeptide N-acetylgalactosaminyltransferase activity	GO:0006486//protein glycosylation
chr3	66064376	66065164	134	58	1.20811	1.25921e-41	ENSGALG00000015061	6.60648e+21	CDS_up	CDC40	ko03040//Spliceosome	GO:0071013//catalytic step 2 spliceosome	GO:0005515//protein binding	-
chrZ	10653467	10654579	166	81	1.03519	4.70391e-41	ENSGALG00000023552	10654481,10654583,103,99	CDS_up	SPEF2	-	GO:0005737//cytoplasm;GO:0005794//Golgi apparatus;GO:0097225//sperm midpiece;GO:0002177//manchette	GO:0005515//protein binding	GO:0007283//spermatogenesis;GO:0048854//brain morphogenesis;GO:0060271//cilium morphogenesis;GO:0035082//axoneme assembly;GO:0009566//fertilization;GO:0048705//skeletal system morphogenesis;GO:0010259//multicellular organismal aging;GO:0002520//immune system development;GO:0060541//respiratory system development;GO:0048702//embryonic neurocranium morphogenesis
chrJH375960.1	3923	5241	169	84	1.00856	4.06038e-40	ENSGALG00000028509	44734607135135	CDS_up	-	-	-	-	-
chr3	30352398	30353271	139	63	1.14166	8.36094e-40	ENSGALG00000010419	3.0353e+21	CDS_up	ABCC10	ko02010//ABC transporters	GO:0016021//integral component of membrane;GO:0005765//lysosomal membrane	GO:0000166//nucleotide binding;GO:0005524//ATP binding;GO:0016887//ATPase activity;GO:0017111//nucleoside-triphosphatase activity;GO:0042626//ATPase activity, coupled to transmembrane movement of substances	GO:0006200//ATP catabolic process;GO:0006810//transport;GO:0008152//metabolic process;GO:0055085//transmembrane transport
chr26	4697908	4699099	132	59	1.16175	8.29396e-39	ENSGALG00000023780	4.69869e+19	CDS_up	TREML2	-	-	GO:0005515//protein binding;GO:0005515//protein binding;GO:0005515//protein binding	-
chr5	10983769	10984778	143	67	1.09378	1.59391e-38	ENSGALG00000006090	10983963,10984043,81,81	CDS_up	PLEKHA7	-	GO:0005813//centrosome;GO:0070062//extracellular vesicular exosome;GO:0005915//zonula adherens	GO:0070097//delta-catenin binding	GO:0045218//zonula adherens maintenance;GO:0090136//epithelial cell-cell adhesion
chr15	5920683	5921525	100	38	1.39593	3.21518e-38	ENSGALG00000004515	5.92103e+19	CDS_up	KNTC1	-	GO:0005737//cytoplasm;GO:0005886//plasma membrane;GO:0015629//actin cytoskeleton;GO:0005828//kinetochore microtubule;GO:0000922//spindle pole	GO:0005515//protein binding	GO:0007093//mitotic cell cycle checkpoint
chr15	5929441	5930239	106	42	1.3356	4.47176e-38	ENSGALG00000004515	5.93e+19	CDS_up	KNTC1	-	GO:0005737//cytoplasm;GO:0005886//plasma membrane;GO:0015629//actin cytoskeleton;GO:0005828//kinetochore microtubule;GO:0000922//spindle pole	GO:0005515//protein binding	GO:0007093//mitotic cell cycle checkpoint
chr10	10362472	10363393	116	49	1.24327	1.06398e-37	ENSGALG00000023440	1.03628e+21	CDS_up	GABPB1	-	GO:0005634//nucleus	GO:0005515//protein binding;GO:0046982//protein heterodimerization activity;GO:0044212//transcription regulatory region DNA binding	GO:0045944//positive regulation of transcription from RNA polymerase II promoter
chr15	8434966	8435851	136	64	1.08746	1.66211e-36	ENSGALG00000006607	8435733,8435817,85,85	CDS_up	GUCD1	-	-	-	-
chrZ	40042462	40043339	129	59	1.12858	1.81549e-36	ENSGALG00000012593	40042447,40042524,78,63	CDS_up	SLC28A3	-	GO:0016020//membrane	GO:0001882//nucleoside binding;GO:0005415//nucleoside:sodium symporter activity;GO:0015389//pyrimidine- and adenine-specific:sodium symporter activity;GO:0015390//purine-specific nucleoside:sodium symporter activity	GO:0006810//transport;GO:0006863//purine nucleobase transport;GO:0015855//pyrimidine nucleobase transport;GO:0015860//purine nucleoside transmembrane transport;GO:0015864//pyrimidine nucleoside transport;GO:0072531//pyrimidine-containing compound transmembrane transport
chr26	2381558	2382876	139	67	1.05285	1.72935e-35	ENSGALG00000000816	2.38187e+19	CDS_up	-	-	GO:0005622//intracellular;GO:0005886//plasma membrane;GO:0005743//mitochondrial inner membrane;GO:0005829//cytosol;GO:0014069//postsynaptic density;GO:0045211//postsynaptic membrane;GO:0045335//phagocytic vesicle	GO:0005515//protein binding;GO:0042803//protein homodimerization activity;GO:0030675//Rac GTPase activator activity;GO:0048365//Rac GTPase binding	GO:0007165//signal transduction;GO:0048812//neuron projection morphogenesis;GO:0060996//dendritic spine development;GO:0046847//filopodium assembly;GO:0032855//positive regulation of Rac GTPase activity;GO:0021816//extension of a leading process involved in cell motility in cerebral cortex radial glia guided migration
chrAADN03010432.1	5303	6033	113	49	1.20547	4.08831e-35	ENSGALG00000021087	55985731134134	CDS_up	-	-	-	GO:0016787//hydrolase activity	GO:0008152//metabolic process
chr7	14772379	14772932	124	57	1.12131	9.84145e-35	ENSGALG00000026366	14772484,14772567,84,84	CDS_up	-	-	-	GO:0004672//protein kinase activity;GO:0004674//protein serine/threonine kinase activity;GO:0005524//ATP binding;GO:0016772//transferase activity, transferring phosphorus-containing groups;GO:0005089//Rho guanyl-nucleotide exchange factor activity;GO:0005515//protein binding;GO:0003676//nucleic acid binding;GO:0004713//protein tyrosine kinase activity	GO:0006468//protein phosphorylation;GO:0035023//regulation of Rho protein signal transduction
chr8	10837315	10838244	121	55	1.1375	1.23506e-34	ENSGALG00000005277	10837707,10837732,26,26	CDS_up	RTCA	-	GO:0005634//nucleus	GO:0000166//nucleotide binding;GO:0003824//catalytic activity;GO:0003963//RNA-3'-phosphate cyclase activity;GO:0005524//ATP binding	GO:0006396//RNA processing
chrJH376338.1	10222	11299	133	64	1.05528	2.9176e-34	ENSGALG00000026052	10378,10384,7,7	CDS_up	-	-	-	GO:0005515//protein binding	-
chr6	22094825	22095706	103	43	1.26024	3.71546e-34	ENSGALG00000007658	22095249,22095335,87,87	CDS_up	C10orf76	-	-	GO:0005488//binding	-
chrZ	23173862	23174793	98	40	1.29278	6.62915e-34	ENSGALG00000004311	2.31743e+21	CDS_up	AGGF1	-	GO:0005576//extracellular region;GO:0005737//cytoplasm;GO:0048471//perinuclear region of cytoplasm	GO:0003676//nucleic acid binding;GO:0005515//protein binding	GO:0007155//cell adhesion;GO:0001938//positive regulation of endothelial cell proliferation;GO:0045766//positive regulation of angiogenesis
chr5	48456718	48457664	101	42	1.26589	6.71791e-34	ENSGALG00000011225	48456828,48456855,28,28	CDS_up	SLC25A47	-	GO:0016020//membrane;GO:0016021//integral component of membrane;GO:0005739//mitochondrion	-	GO:0006810//transport;GO:0055085//transmembrane transport
chr5	12828789	12829615	96	39	1.29956	2.81583e-33	ENSGALG00000006472	1.28289e+21	CDS_up	KCNQ1	ko04725//Cholinergic synapse;ko04972//Pancreatic secretion;ko04971//Gastric acid secretion;ko05110//Vibrio cholerae infection;ko04974//Protein digestion and absorption	GO:0008076//voltage-gated potassium channel complex;GO:0016020//membrane;GO:0016021//integral component of membrane;GO:0008076//voltage-gated potassium channel complex;GO:0016020//membrane;GO:0016021//integral component of membrane;GO:0005764//lysosome;GO:0005769//early endosome;GO:0016323//basolateral plasma membrane;GO:0005770//late endosome	GO:0005216//ion channel activity;GO:0005249//voltage-gated potassium channel activity;GO:0005251//delayed rectifier potassium channel activity;GO:0005267//potassium channel activity;GO:0005216//ion channel activity;GO:0005249//voltage-gated potassium channel activity;GO:0005267//potassium channel activity;GO:0005515//protein binding;GO:0005516//calmodulin binding;GO:0044325//ion channel binding;G…	GO:0006810//transport;GO:0006811//ion transport;GO:0006813//potassium ion transport;GO:0055085//transmembrane transport;GO:0071805//potassium ion transmembrane transport;GO:0006810//transport;GO:0006811//ion transport;GO:0006813//potassium ion transport;GO:0055085//transmembrane transport;GO:0071805//potassium ion transmembrane transport;GO:0035690//cellular response to drug;GO:0060372//regulatio…
chrAADN03024004.1	9815	10711	119	55	1.11346	3.88671e-33	ENSGALG00000013313	1023910355117110	CDS_up	-	-	-	GO:0003723//RNA binding	-
chr7	34324126	34324967	131	64	1.03342	1.05317e-32	ENSGALG00000012462	34324397,34324473,77,77	CDS_up	KIF5C	-	GO:0005871//kinesin complex;GO:0005874//microtubule	GO:0000166//nucleotide binding;GO:0003777//microtubule motor activity;GO:0005524//ATP binding;GO:0008017//microtubule binding;GO:0005515//protein binding	GO:0007018//microtubule-based movement;GO:0008152//metabolic process;GO:0051028//mRNA transport
chr5	45169488	45170293	99	42	1.23704	3.77108e-32	ENSGALG00000011071	4.51695e+21	CDS_up	CLMN	-	GO:0005737//cytoplasm	GO:0003779//actin binding;GO:0005515//protein binding	GO:0031175//neuron projection development;GO:0008285//negative regulation of cell proliferation
chr3	8495602	8496663	123	59	1.05987	6.3982e-32	ENSGALG00000008989	8495922,8496008,87,87	CDS_up	WDR43	ko03008//Ribosome biogenesis in eukaryotes	-	GO:0005515//protein binding	-
chrZ	10450322	10451100	123	59	1.05987	6.3982e-32	ENSGALG00000003432	10450490,10450583,94,94	CDS_up	AGXT2	ko01100//Metabolic pathways;ko00260//Glycine, serine and threonine metabolism;ko00250//Alanine, aspartate and glutamate metabolism	GO:0005739//mitochondrion	GO:0003824//catalytic activity;GO:0008483//transaminase activity;GO:0030170//pyridoxal phosphate binding;GO:0008453//alanine-glyoxylate transaminase activity	GO:0019481//L-alanine catabolic process, by transamination;GO:0019265//glycine biosynthetic process, by transamination of glyoxylate;GO:0009436//glyoxylate catabolic process;GO:0045429//positive regulation of nitric oxide biosynthetic process
chr4	81889561	81891046	120	57	1.074	1.18316e-31	ENSGALG00000015664	8.18897e+21	CDS_up	ADD1	-	GO:0005856//cytoskeleton;GO:0005886//plasma membrane;GO:0005634//nucleus;GO:0005925//focal adhesion;GO:0008290//F-actin capping protein complex;GO:0045111//intermediate filament cytoskeleton;GO:0016020//membrane	GO:0042803//protein homodimerization activity;GO:0046982//protein heterodimerization activity;GO:0008134//transcription factor binding;GO:0051015//actin filament binding;GO:0030507//spectrin binding;GO:0005198//structural molecule activity	GO:0032092//positive regulation of protein binding;GO:0051017//actin filament bundle assembly;GO:0051016//barbed-end actin filament capping;GO:0035264//multicellular organism growth;GO:0000902//cell morphogenesis;GO:0030218//erythrocyte differentiation;GO:0020027//hemoglobin metabolic process;GO:0048873//homeostasis of number of cells within a tissue;GO:0006884//cell volume homeostasis
chr20	12762322	12763195	95	40	1.24793	2.94807e-31	ENSGALG00000007796	12762479,12762550,72,72	CDS_up	BCAS1	-	GO:0070062//extracellular vesicular exosome	-	-
chrAADN03013844.1	276	1102	115	54	1.0906	3.1458e-31	ENSGALG00000027004	7151319605388	CDS_up	-	-	-	GO:0005515//protein binding	-
chr26	3479834	3480663	108	49	1.14018	3.35549e-31	ENSGALG00000001547	3.4802e+19	CDS_up	CAPZA1	-	GO:0008290//F-actin capping protein complex;GO:0071203//WASH complex;GO:0005737//cytoplasm;GO:0005829//cytosol;GO:0030018//Z disc;GO:0070062//extracellular vesicular exosome	GO:0003779//actin binding;GO:0005515//protein binding	GO:0030036//actin cytoskeleton organization;GO:0051693//actin filament capping;GO:0051016//barbed-end actin filament capping
chrZ	12051371	12052164	122	59	1.04809	3.88151e-31	ENSGALG00000003775	1.20518e+21	CDS_up	RICTOR	ko04150//mTOR signaling pathway	GO:0031932//TORC2 complex	GO:0005488//binding;GO:0005515//protein binding;GO:0019901//protein kinase binding;GO:0043022//ribosome binding	GO:0031929//TOR signaling;GO:0032008//positive regulation of TOR signaling;GO:0031532//actin cytoskeleton reorganization;GO:0032956//regulation of actin cytoskeleton organization;GO:0051896//regulation of protein kinase B signaling;GO:0018105//peptidyl-serine phosphorylation;GO:0032314//regulation of Rac GTPase activity;GO:0030838//positive regulation of actin filament polymerization;GO:0009790//…
chrJH376137.1	169	610	102	45	1.18057	4.8326e-31	ENSGALG00000026398	414741328197	CDS_up	-	-	-	-	-
chr5	26185247	26186231	123	60	1.03562	5.56378e-31	ENSGALG00000009368	26185713,26185796,84,84	CDS_up	RGS6	-	GO:0005834//heterotrimeric G-protein complex;GO:0005834//heterotrimeric G-protein complex	GO:0004871//signal transducer activity;GO:0004871//signal transducer activity;GO:0005515//protein binding	GO:0007186//G-protein coupled receptor signaling pathway;GO:0035556//intracellular signal transduction;GO:0038032//termination of G-protein coupled receptor signaling pathway;GO:0008277//regulation of G-protein coupled receptor protein signaling pathway;GO:0007186//G-protein coupled receptor signaling pathway;GO:0035556//intracellular signal transduction;GO:0038032//termination of G-protein coupl…
chr5	58214949	58215717	111	52	1.09398	2.63043e-30	ENSGALG00000012426	5.82153e+21	CDS_up	DDHD1	-	-	GO:0046872//metal ion binding	-
chr9	7569124	7570097	116	56	1.05063	6.58212e-30	ENSGALG00000005206	7.56983e+19	CDS_up	ACSL3	ko01100//Metabolic pathways;ko04146//Peroxisome;ko03320//PPAR signaling pathway;ko04920//Adipocytokine signaling pathway;ko00071//Fatty acid metabolism	GO:0005794//Golgi apparatus;GO:0016020//membrane;GO:0005783//endoplasmic reticulum;GO:0048471//perinuclear region of cytoplasm;GO:0005811//lipid particle	GO:0003824//catalytic activity;GO:0019904//protein domain specific binding;GO:0019901//protein kinase binding;GO:0004467//long-chain fatty acid-CoA ligase activity	GO:0008152//metabolic process;GO:2001247//positive regulation of phosphatidylcholine biosynthetic process;GO:0051047//positive regulation of secretion;GO:0042998//positive regulation of Golgi to plasma membrane protein transport;GO:0034379//very-low-density lipoprotein particle assembly;GO:0044539//long-chain fatty acid import
chrZ	67318379	67319001	120	59	1.02425	1.36919e-29	ENSGALG00000015799	67318853,67318949,97,97	CDS_up	ELAVL2	-	-	GO:0000166//nucleotide binding;GO:0003676//nucleic acid binding;GO:0003723//RNA binding;GO:0005515//protein binding	-
chrZ	26275250	26276150	100	45	1.152	2.27393e-29	ENSGALG00000010164	2.62756e+21	CDS_up	SMARCA2	-	GO:0005634//nucleus;GO:0043231//intracellular membrane-bounded organelle;GO:0000790//nuclear chromatin;GO:0045111//intermediate filament cytoskeleton;GO:0016514//SWI/SNF complex;GO:0071564//npBAF complex;GO:0071565//nBAF complex	GO:0003676//nucleic acid binding;GO:0003677//DNA binding;GO:0004386//helicase activity;GO:0005524//ATP binding;GO:0016817//hydrolase activity, acting on acid anhydrides;GO:0016818//hydrolase activity, acting on acid anhydrides, in phosphorus-containing anhydrides;GO:0042393//histone binding;GO:0005515//protein binding;GO:0044212//transcription regulatory region DNA binding;GO:0001105//RNA polymer…	GO:0006355//regulation of transcription, DNA-templated;GO:0008152//metabolic process;GO:0030308//negative regulation of cell growth;GO:0045893//positive regulation of transcription, DNA-templated;GO:0045944//positive regulation of transcription from RNA polymerase II promoter;GO:0045892//negative regulation of transcription, DNA-templated;GO:0008285//negative regulation of cell proliferation;GO:0…
chrZ	63475572	63476478	101	46	1.13465	3.58005e-29	ENSGALG00000023089	63475804,63475863,60,60	CDS_up	SSBP2	-	-	GO:0003697//single-stranded DNA binding;GO:0005515//protein binding	-
chr4	34134024	34134480	109	52	1.06774	7.62207e-29	ENSGALG00000010281	3.4134e+21	CDS_up	WRN	-	GO:0005622//intracellular;GO:0005813//centrosome;GO:0005730//nucleolus;GO:0005654//nucleoplasm;GO:0032389//MutLalpha complex;GO:0005634//nucleus	GO:0000166//nucleotide binding;GO:0003676//nucleic acid binding;GO:0003824//catalytic activity;GO:0004386//helicase activity;GO:0005524//ATP binding;GO:0008026//ATP-dependent helicase activity;GO:0008408//3'-5' exonuclease activity;GO:0016787//hydrolase activity;GO:0043140//ATP-dependent 3'-5' DNA helicase activity;GO:0003677//DNA binding;GO:0005515//protein binding;GO:0000287//magnesium ion bind…	GO:0006139//nucleobase-containing compound metabolic process;GO:0006260//DNA replication;GO:0006281//DNA repair;GO:0006310//DNA recombination;GO:0044237//cellular metabolic process;GO:0090305//nucleic acid phosphodiester bond hydrolysis;GO:0006974//cellular response to DNA damage stimulus;GO:0042981//regulation of apoptotic process;GO:0006284//base-excision repair;GO:0006302//double-strand break …
chrJH375914.1	1917	2963	116	57	1.02509	8.61512e-29	ENSGALG00000028229	22462380135135	CDS_up	-	-	-	GO:0005515//protein binding	-
chr15	8077478	8078349	113	55	1.03882	1.65526e-28	ENSGALG00000006320	8.0778e+19	CDS_up	-	-	GO:0016020//membrane;GO:0016021//integral component of membrane	GO:0005215//transporter activity;GO:0022857//transmembrane transporter activity;GO:0022891//substrate-specific transmembrane transporter activity	GO:0006810//transport;GO:0055085//transmembrane transport
chr8	28504110	28505068	113	55	1.03882	1.65526e-28	ENSGALG00000011353	28504173,28504232,60,60	CDS_up	TNNI3K	-	-	GO:0004672//protein kinase activity;GO:0005524//ATP binding;GO:0016772//transferase activity, transferring phosphorus-containing groups;GO:0005515//protein binding;GO:0004713//protein tyrosine kinase activity	GO:0006468//protein phosphorylation
chr8	18537016	18537747	110	53	1.05344	2.32677e-28	ENSGALG00000009902	1.85376e+21	CDS_up	CFAP57	-	-	GO:0005515//protein binding	-
chr5	43355346	43356246	114	56	1.02554	2.34931e-28	ENSGALG00000010680	4.33555e+21	CDS_up	TTC7B	-	-	GO:0005515//protein binding	-
chr6	18284287	18285073	97	44	1.14048	2.95616e-28	ENSGALG00000006254	1.82847e+21	CDS_up	ERCC6	ko03420//Nucleotide excision repair	GO:0005730//nucleolus;GO:0005634//nucleus;GO:0005654//nucleoplasm;GO:0008023//transcription elongation factor complex	GO:0003676//nucleic acid binding;GO:0003677//DNA binding;GO:0004386//helicase activity;GO:0005524//ATP binding;GO:0005515//protein binding;GO:0003682//chromatin binding;GO:0047485//protein N-terminus binding;GO:0030296//protein tyrosine kinase activator activity;GO:0032403//protein complex binding;GO:0008094//DNA-dependent ATPase activity;GO:0008022//protein C-terminus binding	GO:0006200//ATP catabolic process;GO:0009411//response to UV;GO:0032786//positive regulation of DNA-templated transcription, elongation;GO:0032784//regulation of DNA-templated transcription, elongation;GO:0061098//positive regulation of protein tyrosine kinase activity;GO:0006284//base-excision repair;GO:0006979//response to oxidative stress;GO:0006283//transcription-coupled nucleotide-excision r…
chr8	7084791	7085618	97	44	1.14048	2.95616e-28	ENSGALG00000004554	7.08516e+19	CDS_up	CACYBP	ko04310//Wnt signaling pathway	GO:0070062//extracellular vesicular exosome;GO:0005737//cytoplasm;GO:0005634//nucleus;GO:0030877//beta-catenin destruction complex;GO:0005641//nuclear envelope lumen	GO:0005515//protein binding;GO:0042803//protein homodimerization activity	-
chrZ	36588395	36589255	106	52	1.02748	1.68066e-26	ENSGALG00000015154	36589071,36589168,98,98	CDS_up	TRPM6	-	GO:0016020//membrane;GO:0016021//integral component of membrane;GO:0016324//apical plasma membrane;GO:0031526//brush border membrane	GO:0004674//protein serine/threonine kinase activity;GO:0005216//ion channel activity;GO:0005524//ATP binding;GO:0016772//transferase activity, transferring phosphorus-containing groups;GO:0005515//protein binding;GO:0005261//cation channel activity	GO:0006468//protein phosphorylation;GO:0006810//transport;GO:0006811//ion transport;GO:0034220//ion transmembrane transport;GO:0055085//transmembrane transport;GO:0009636//response to toxic substance;GO:0030001//metal ion transport
chr4	52983334	52984316	105	52	1.01381	7.33191e-26	ENSGALG00000011834	5.29833e+21	CDS_up	NUDT6	-	-	GO:0016787//hydrolase activity	GO:0008152//metabolic process
chrJH375645.1	1890	2463	92	43	1.0973	2.56042e-25	ENSGALG00000029179	19842295312312	CDS_up	-	-	-	GO:0005515//protein binding	-
chr7	27429632	27430347	103	51	1.01408	3.04619e-25	ENSGALG00000011806	2.74299e+21	CDS_up	MUC13	-	GO:0005615//extracellular space;GO:0070062//extracellular vesicular exosome;GO:0005829//cytosol;GO:0016324//apical plasma membrane	GO:0042803//protein homodimerization activity	GO:0030277//maintenance of gastrointestinal epithelium
chr14	8771804	8772551	101	50	1.01436	6.21209e-25	ENSGALG00000007070	8.77184e+19	CDS_up	OTOA	-	GO:0016324//apical plasma membrane	-	GO:0007605//sensory perception of sound;GO:0007160//cell-matrix adhesion;GO:0019226//transmission of nerve impulse
chr3	62962225	62962807	94	46	1.03103	7.59694e-24	ENSGALG00000014913	6.29623e+21	CDS_up	ROS1	-	GO:0016020//membrane;GO:0016021//integral component of membrane	GO:0000166//nucleotide binding;GO:0004672//protein kinase activity;GO:0004713//protein tyrosine kinase activity;GO:0004714//transmembrane receptor protein tyrosine kinase activity;GO:0005524//ATP binding;GO:0016301//kinase activity;GO:0016740//transferase activity;GO:0016772//transferase activity, transferring phosphorus-containing groups;GO:0005515//protein binding;GO:0019903//protein phosphatas…	GO:0006468//protein phosphorylation;GO:0007169//transmembrane receptor protein tyrosine kinase signaling pathway;GO:0016310//phosphorylation;GO:0016049//cell growth;GO:0032006//regulation of TOR signaling;GO:0007283//spermatogenesis;GO:0030154//cell differentiation;GO:0010629//negative regulation of gene expression;GO:0008283//cell proliferation;GO:0070372//regulation of ERK1 and ERK2 cascade;GO:…
chr5	21468445	21469391	90	44	1.03242	6.44465e-23	ENSGALG00000014072	21468893,21468991,99,99	CDS_up	TSPAN18	-	GO:0016020//membrane;GO:0016021//integral component of membrane	-	-
chrJH376331.1	12682	14729	566	1363	-1.26791	0	ENSGALG00000018791	14532,14606,75,75	CDS_down	-	-	-	-	-
chrZ	65132058	65132868	8	343	-5.42206	0	ENSGALG00000028000	6.51322e+21	CDS_down	-	-	-	GO:0008270//zinc ion binding;GO:0046872//metal ion binding;GO:0005515//protein binding;GO:0008270//zinc ion binding;GO:0046872//metal ion binding;GO:0005515//protein binding;GO:0008270//zinc ion binding;GO:0046872//metal ion binding;GO:0005515//protein binding;GO:0008270//zinc ion binding;GO:0046872//metal ion binding;GO:0005515//protein binding;GO:0008270//zinc ion binding;GO:0046872//metal ion …	-
chrJH375229.1	3104	4616	0	138	#NUM!	1.64655e-229	ENSGALG00000022690	3910,4002,93,93	CDS_down	-	-	-	GO:0003824//catalytic activity	GO:0008152//metabolic process
chr9	15638794	15640491	67	326	-2.28264	1.476e-201	ENSGALG00000008646	1.56391e+21	CDS_down	HRG	-	GO:0070062//extracellular vesicular exosome;GO:0072562//blood microparticle;GO:0031982//vesicle;GO:0061474//phagolysosome membrane;GO:0036019//endolysosome	GO:0004869//cysteine-type endopeptidase inhibitor activity;GO:0008201//heparin binding;GO:0020037//heme binding;GO:0008270//zinc ion binding;GO:0005515//protein binding;GO:0046872//metal ion binding;GO:0005102//receptor binding;GO:0043395//heparan sulfate proteoglycan binding;GO:0019865//immunoglobulin binding;GO:0004867//serine-type endopeptidase inhibitor activity	GO:0010951//negative regulation of endopeptidase activity;GO:0016525//negative regulation of angiogenesis;GO:0030308//negative regulation of cell growth;GO:0010468//regulation of gene expression;GO:0043065//positive regulation of apoptotic process;GO:0008285//negative regulation of cell proliferation;GO:0030193//regulation of blood coagulation;GO:0032956//regulation of actin cytoskeleton organiza…
chrJH375335.1	7108	9594	230	501	-1.12318	9.9231e-114	ENSGALG00000025880	77787940163163	CDS_down	-	-	-	GO:0008270//zinc ion binding;GO:0046872//metal ion binding	-
chrAADN03026614.1	403	1543	6	110	-4.1964	8.39275e-113	ENSGALG00000027239	12851455171171	CDS_down	-	-	-	GO:0003779//actin binding;GO:0008017//microtubule binding;GO:0016887//ATPase activity;GO:0005515//protein binding	GO:0006200//ATP catabolic process;GO:0016055//Wnt signaling pathway
chrJH376031.1	942	2184	47	197	-2.06746	3.20352e-109	ENSGALG00000026905	18362076241241	CDS_down	-	-	-	GO:0005515//protein binding	-
chr16	379718	381799	39	180	-2.20645	6.02987e-108	ENSGALG00000004772	3.81449e+17	CDS_down	-	-	GO:0016020//membrane;GO:0042612//MHC class I protein complex	GO:0042605//peptide antigen binding;GO:0005515//protein binding	GO:0001916//positive regulation of T cell mediated cytotoxicity;GO:0002474//antigen processing and presentation of peptide antigen via MHC class I;GO:0006955//immune response;GO:0019882//antigen processing and presentation
chrZ	63921229	63922220	103	281	-1.44793	8.62808e-96	ENSGALG00000015577	6.39218e+21	CDS_down	-	-	-	-	-
chr3	66225029	66225962	31	151	-2.28421	3.45076e-94	ENSGALG00000015070	6.62255e+21	CDS_down	FIG4	-	GO:0010008//endosome membrane	GO:0042578//phosphoric ester hydrolase activity;GO:0005515//protein binding;GO:0042578//phosphoric ester hydrolase activity	GO:0007626//locomotory behavior;GO:0043473//pigmentation;GO:0046488//phosphatidylinositol metabolic process;GO:0048666//neuron development;GO:0031642//negative regulation of myelination;GO:0032288//myelin assembly;GO:0007033//vacuole organization;GO:0008152//metabolic process
chrZ	74402362	74403865	57	190	-1.73697	2.1649e-84	ENSGALG00000027162	74402448,74402532,85,85	CDS_down	-	-	GO:0005634//nucleus	GO:0003677//DNA binding;GO:0003700//sequence-specific DNA binding transcription factor activity	GO:0006355//regulation of transcription, DNA-templated
chrAADN03013519.1	12	748	73	213	-1.54489	4.13505e-80	ENSGALG00000026540	357,388,32,32	CDS_down	-	-	-	GO:0004497//monooxygenase activity;GO:0005506//iron ion binding;GO:0016491//oxidoreductase activity;GO:0016705//oxidoreductase activity, acting on paired donors, with incorporation or reduction of molecular oxygen;GO:0020037//heme binding;GO:0046872//metal ion binding	GO:0055114//oxidation-reduction process
chr4	11123405	11124510	21	117	-2.47805	4.82866e-80	ENSGALG00000007466	1.11241e+21	CDS_down	EDNRB2	ko04080//Neuroactive ligand-receptor interaction;ko04020//Calcium signaling pathway;ko04916//Melanogenesis	GO:0016021//integral component of membrane;GO:0016021//integral component of membrane	GO:0004871//signal transducer activity;GO:0004930//G-protein coupled receptor activity;GO:0004962//endothelin receptor activity;GO:0004871//signal transducer activity;GO:0004930//G-protein coupled receptor activity;GO:0004962//endothelin receptor activity	GO:0007165//signal transduction;GO:0007186//G-protein coupled receptor signaling pathway;GO:0008217//regulation of blood pressure;GO:0042310//vasoconstriction;GO:0048484//enteric nervous system development;GO:0086100//endothelin receptor signaling pathway;GO:0007165//signal transduction;GO:0007186//G-protein coupled receptor signaling pathway;GO:0008217//regulation of blood pressure;GO:0042310//v…
chrZ	74406877	74408120	43	159	-1.88662	5.53151e-79	ENSGALG00000027162	7.44072e+21	CDS_down	-	-	GO:0005634//nucleus	GO:0003677//DNA binding;GO:0003700//sequence-specific DNA binding transcription factor activity	GO:0006355//regulation of transcription, DNA-templated
chr8	12917589	12918284	33	136	-2.04307	9.16288e-75	ENSGALG00000005889	12918006,12918025,20,20	CDS_down	CCDC18	-	-	-	-
chr6	27223971	27225481	22	113	-2.36075	8.57648e-74	ENSGALG00000008956	2.72249e+21	CDS_down	CCDC186	-	-	-	-
chr8	14777375	14778463	70	199	-1.50734	2.38864e-72	ENSGALG00000028423	1.47775e+21	CDS_down	HS2ST1	ko00534//Glycosaminoglycan biosynthesis - heparan sulfate	GO:0016021//integral component of membrane	GO:0008146//sulfotransferase activity;GO:0004394//heparan sulfate 2-O-sulfotransferase activity	GO:0015014//heparan sulfate proteoglycan biosynthetic process, polysaccharide chain biosynthetic process;GO:0030202//heparin metabolic process;GO:0060676//ureteric bud formation
chrJH375196.1	3566	5621	73	203	-1.47551	1.50398e-71	ENSGALG00000026352	40094147139139	CDS_down	-	-	-	GO:0030246//carbohydrate binding	-
chr6	34320929	34321659	24	115	-2.26053	2.28837e-71	ENSGALG00000010471	3.43215e+21	CDS_down	PPP2R2D	ko05160//Hepatitis C;ko04530//Tight junction;ko05142//Chagas disease (American trypanosomiasis);ko03015//mRNA surveillance pathway	GO:0000159//protein phosphatase type 2A complex	GO:0008601//protein phosphatase type 2A regulator activity;GO:0005515//protein binding	GO:0007165//signal transduction;GO:0050790//regulation of catalytic activity
chrJH376326.1	16	1680	48	158	-1.71882	1.94191e-69	ENSGALG00000028179	606917312312	CDS_down	-	-	-	GO:0005515//protein binding	-
chrZ	8764080	8765105	47	156	-1.73081	2.60556e-69	ENSGALG00000002326	8.76481e+19	CDS_down	-	-	GO:0016020//membrane;GO:0016021//integral component of membrane;GO:0001669//acrosomal vesicle	GO:0000166//nucleotide binding;GO:0000287//magnesium ion binding;GO:0004012//phospholipid-translocating ATPase activity;GO:0005524//ATP binding;GO:0016787//hydrolase activity;GO:0019829//cation-transporting ATPase activity;GO:0046872//metal ion binding;GO:0005548//phospholipid transporter activity	GO:0006812//cation transport;GO:0008152//metabolic process;GO:0015914//phospholipid transport;GO:0045332//phospholipid translocation;GO:0007030//Golgi organization
chrZ	80469404	80470284	114	262	-1.20053	4.42206e-67	ENSGALG00000022133	8.04696e+21	CDS_down	-	-	GO:0005634//nucleus	GO:0003677//DNA binding;GO:0003700//sequence-specific DNA binding transcription factor activity	GO:0006355//regulation of transcription, DNA-templated
chrAADN03023939.1	875	2675	50	157	-1.65076	2.32448e-65	ENSGALG00000018583	20542332279279	CDS_down	-	-	-	-	-
chrAADN03019574.1	11	1063	34	128	-1.91254	6.98424e-65	ENSGALG00000010880	20212021001862	CDS_down	-	-	-	GO:0003676//nucleic acid binding;GO:0003700//sequence-specific DNA binding transcription factor activity;GO:0046872//metal ion binding	GO:0006355//regulation of transcription, DNA-templated
chrJH375207.1	18909	20069	37	133	-1.84583	1.70425e-64	ENSGALG00000027445	1989720169273170	CDS_down	-	-	GO:0016020//membrane;GO:0016021//integral component of membrane;GO:0042612//MHC class I protein complex	GO:0042605//peptide antigen binding;GO:0005515//protein binding	GO:0001916//positive regulation of T cell mediated cytotoxicity;GO:0002474//antigen processing and presentation of peptide antigen via MHC class I;GO:0006955//immune response;GO:0019882//antigen processing and presentation
chrJH376326.1	55118	56968	29	118	-2.02466	1.80361e-64	ENSGALG00000028805	5658456718135130	CDS_down	-	-	-	GO:0005515//protein binding	-
chr3	51346649	51347616	28	116	-2.05063	3.76767e-64	ENSGALG00000013737	51347018,51347107,90,90	CDS_down	TMEM181	-	-	GO:0015643//toxic substance binding	GO:0009405//pathogenesis
chrZ	76504758	76505468	116	261	-1.16993	4.20911e-64	ENSGALG00000025986	7.65049e+21	CDS_down	-	-	GO:0005634//nucleus	GO:0003677//DNA binding;GO:0003700//sequence-specific DNA binding transcription factor activity	GO:0006355//regulation of transcription, DNA-templated
chrAADN03012715.1	157	968	119	265	-1.15503	9.26942e-64	ENSGALG00000028791	358746389389	CDS_down	-	-	-	-	-
chr5	50352727	50354077	60	172	-1.51937	1.14852e-63	ENSGALG00000011528	5.03533e+21	CDS_down	KLC1	-	GO:0005871//kinesin complex;GO:0016020//membrane;GO:0005737//cytoplasm;GO:0031410//cytoplasmic vesicle;GO:0030424//axon;GO:0043005//neuron projection;GO:0035253//ciliary rootlet;GO:0043227//membrane-bounded organelle	GO:0003777//microtubule motor activity;GO:0005515//protein binding	GO:0008152//metabolic process;GO:0008088//axon cargo transport
chr7	26113297	26114461	86	214	-1.3152	2.01829e-63	ENSGALG00000011686	2.61136e+21	CDS_down	SEMA5B	-	GO:0016020//membrane;GO:0016021//integral component of membrane	GO:0004872//receptor activity;GO:0005515//protein binding	GO:0007275//multicellular organismal development
chr4	32610597	32611553	32	122	-1.93074	7.50033e-63	ENSGALG00000010061	32610824,32610916,93,93	CDS_down	LRBA	-	GO:0016020//membrane;GO:0016023//cytoplasmic membrane-bounded vesicle	GO:0005515//protein binding;GO:0005488//binding	-
chr4	33522183	33522911	16	90	-2.49185	1.99582e-62	ENSGALG00000010122	3.35228e+21	CDS_down	SH2D4A	-	GO:0005737//cytoplasm	GO:0005515//protein binding;GO:0019902//phosphatase binding	GO:0010923//negative regulation of phosphatase activity
chrJH376400.1	5164	6577	38	132	-1.79647	1.21549e-61	ENSGALG00000028353	6545,6580,36,33	CDS_down	-	-	-	GO:0005515//protein binding	-
chr6	29542095	29543193	40	134	-1.74416	2.79885e-60	ENSGALG00000009336	2.95424e+21	CDS_down	FAM45A	-	-	-	-
chr7	14427740	14428577	23	100	-2.12029	6.25943e-58	ENSGALG00000009012	1.44284e+21	CDS_down	ZNF385B	-	GO:0005634//nucleus	GO:0003676//nucleic acid binding;GO:0008270//zinc ion binding;GO:0046872//metal ion binding;GO:0002039//p53 binding	GO:0072332//intrinsic apoptotic signaling pathway by p53 class mediator
chr20	11266822	11267828	35	120	-1.77761	2.1799e-55	ENSGALG00000007509	11267654,11267727,74,74	CDS_down	GNAS	ko04020//Calcium signaling pathway;ko04270//Vascular smooth muscle contraction;ko04916//Melanogenesis;ko05142//Chagas disease (American trypanosomiasis);ko04912//GnRH signaling pathway;ko05146//Amoebiasis;ko05414//Dilated cardiomyopathy;ko04540//Gap junction;ko04972//Pancreatic secretion;ko04724//Glutamatergic synapse;ko04971//Gastric acid secretion;ko04730//Long-term depression;ko04970//Salivary…	GO:0005834//heterotrimeric G-protein complex;GO:0070062//extracellular vesicular exosome;GO:0016020//membrane;GO:0030425//dendrite	GO:0000166//nucleotide binding;GO:0003924//GTPase activity;GO:0004871//signal transducer activity;GO:0005159//insulin-like growth factor receptor binding;GO:0005525//GTP binding;GO:0019001//guanyl nucleotide binding;GO:0031683//G-protein beta/gamma-subunit complex binding;GO:0031698//beta-2 adrenergic receptor binding;GO:0031748//D1 dopamine receptor binding;GO:0031852//mu-type opioid receptor bi…	GO:0006184//GTP catabolic process;GO:0007165//signal transduction;GO:0007186//G-protein coupled receptor signaling pathway;GO:0007191//adenylate cyclase-activating dopamine receptor signaling pathway;GO:0007606//sensory perception of chemical stimulus;GO:0060348//bone development;GO:0070527//platelet aggregation;GO:0060789//hair follicle placode formation;GO:0048589//developmental growth;GO:00071…
chr6	28566880	28568002	73	181	-1.31002	1.69638e-53	ENSGALG00000009258	28566953,28567005,53,53	CDS_down	KIAA1598	-	GO:0044295//axonal growth cone	GO:0019900//kinase binding;GO:0005515//protein binding	GO:0048812//neuron projection morphogenesis;GO:2000114//regulation of establishment of cell polarity;GO:2001222//regulation of neuron migration
chr10	8213945	8215061	51	145	-1.50748	3.19775e-53	ENSGALG00000004564	8.21466e+19	CDS_down	FAM214A	-	-	-	-
chr18	10935235	10936022	36	119	-1.72489	4.39507e-53	ENSGALG00000007965	10936002,10936029,28,21	CDS_down	HN1	-	-	-	-
chr7	15040605	15041760	40	126	-1.65535	6.16578e-53	ENSGALG00000009202	1.5041e+21	CDS_down	RBM45	-	GO:0005737//cytoplasm;GO:0005634//nucleus	GO:0000166//nucleotide binding;GO:0003676//nucleic acid binding;GO:0003723//RNA binding	-
chr4	68788033	68788916	38	122	-1.68281	2.35147e-52	ENSGALG00000014290	68788635,68788717,83,83	CDS_down	UBE2K	ko04120//Ubiquitin mediated proteolysis	GO:0070062//extracellular vesicular exosome	GO:0016874//ligase activity;GO:0016881//acid-amino acid ligase activity;GO:0005515//protein binding;GO:0004842//ubiquitin-protein ligase activity;GO:0031625//ubiquitin protein ligase binding;GO:0034450//ubiquitin-ubiquitin ligase activity	GO:0070936//protein K48-linked ubiquitination;GO:0032434//regulation of proteasomal ubiquitin-dependent protein catabolic process
chr9	2154036	2155278	41	127	-1.63113	2.79932e-52	ENSGALG00000002302	2.15433e+19	CDS_down	YEATS2	-	GO:0005634//nucleus;GO:0005671//Ada2/Gcn5/Ada3 transcription activator complex;GO:0072686//mitotic spindle	GO:0005515//protein binding;GO:0017025//TBP-class protein binding	GO:0006355//regulation of transcription, DNA-templated;GO:0000122//negative regulation of transcription from RNA polymerase II promoter;GO:0045892//negative regulation of transcription, DNA-templated;GO:0043966//histone H3 acetylation
chrJH376272.1	2656	5392	88	201	-1.19162	2.25959e-51	ENSGALG00000026855	2563429317311630	CDS_down	-	-	-	-	-
chr9	8806524	8807418	26	99	-1.92892	3.8479e-51	ENSGALG00000004946	8.8073e+19	CDS_down	COL4A4	-	GO:0005581//collagen trimer;GO:0005587//collagen type IV trimer;GO:0005605//basal lamina;GO:0005604//basement membrane	GO:0005201//extracellular matrix structural constituent	GO:0032836//glomerular basement membrane development
chrZ	73372009	73373102	76	182	-1.25987	9.37249e-51	ENSGALG00000022059	7.33728e+21	CDS_down	-	-	GO:0005634//nucleus	GO:0003677//DNA binding;GO:0003700//sequence-specific DNA binding transcription factor activity	GO:0006355//regulation of transcription, DNA-templated
chr4	48552198	48553153	42	127	-1.59637	1.13661e-50	ENSGALG00000011336	4.85527e+21	CDS_down	TECRL	-	GO:0005737//cytoplasm;GO:0016020//membrane;GO:0016021//integral component of membrane	GO:0016627//oxidoreductase activity, acting on the CH-CH group of donors	GO:0006629//lipid metabolic process;GO:0055114//oxidation-reduction process
chr5	45689889	45691565	48	137	-1.51307	1.27061e-50	ENSGALG00000011085	45690049,45690125,77,77	CDS_down	ATG2B	-	GO:0000407//pre-autophagosomal structure;GO:0019898//extrinsic component of membrane	-	GO:0000045//autophagic vacuole assembly;GO:0000422//mitochondrion degradation;GO:0006914//autophagy;GO:0006995//cellular response to nitrogen starvation;GO:0044804
chr5	23984825	23985784	62	159	-1.35869	6.41132e-50	ENSGALG00000008603	2.39855e+21	CDS_down	IP3KA	ko01100//Metabolic pathways;ko04020//Calcium signaling pathway;ko04070//Phosphatidylinositol signaling system;ko00562//Inositol phosphate metabolism	-	GO:0008440//inositol-1,4,5-trisphosphate 3-kinase activity;GO:0016740//transferase activity	GO:0016310//phosphorylation;GO:0048167//regulation of synaptic plasticity;GO:0006020//inositol metabolic process
chrZ	75490363	75492069	52	141	-1.43911	2.21412e-48	ENSGALG00000021994	7.54914e+21	CDS_down	-	-	GO:0005634//nucleus	GO:0003677//DNA binding;GO:0003700//sequence-specific DNA binding transcription factor activity	GO:0006355//regulation of transcription, DNA-templated
chr3	61281735	61282649	39	119	-1.60942	2.31817e-48	ENSGALG00000014876	6.12825e+21	CDS_down	TBC1D32	-	-	GO:0005097//Rab GTPase activator activity;GO:0005488//binding;GO:0005515//protein binding	GO:0032313//regulation of Rab GTPase activity;GO:0032851//positive regulation of Rab GTPase activity;GO:0007224//smoothened signaling pathway;GO:0043010//camera-type eye development;GO:0002088//lens development in camera-type eye;GO:0060041//retina development in camera-type eye;GO:0021915//neural tube development;GO:0060271//cilium morphogenesis;GO:0042733//embryonic digit morphogenesis;GO:00608…
chr5	8823807	8824793	30	103	-1.77961	6.74174e-48	ENSGALG00000005807	8.82454e+19	CDS_down	IPO7	-	GO:0016020//membrane	GO:0008536//Ran GTPase binding;GO:0005488//binding;GO:0005515//protein binding;GO:0042393//histone binding	GO:0006886//intracellular protein transport;GO:0045087//innate immune response;GO:0006606//protein import into nucleus
chr3	48502631	48503512	35	111	-1.66513	3.69247e-47	ENSGALG00000013505	4.85029e+21	CDS_down	SYNE1	-	GO:0016021//integral component of membrane;GO:0005794//Golgi apparatus;GO:0005737//cytoplasm;GO:0005634//nucleus;GO:0045211//postsynaptic membrane;GO:0005635//nuclear envelope;GO:0031965//nuclear membrane;GO:0030017//sarcomere;GO:0034993//SUN-KASH complex	GO:0003779//actin binding;GO:0005515//protein binding;GO:0005521//lamin binding;GO:0051015//actin filament binding;GO:0042803//protein homodimerization activity	GO:0007030//Golgi organization;GO:0090292//nuclear matrix anchoring at nuclear membrane;GO:0090286//cytoskeletal anchoring at nuclear membrane;GO:0042692//muscle cell differentiation;GO:0040023//establishment of nucleus localization
chrZ	74400638	74402332	87	193	-1.14951	1.51138e-46	ENSGALG00000027162	74401912,74402008,97,97	CDS_down	-	-	GO:0005634//nucleus	GO:0003677//DNA binding;GO:0003700//sequence-specific DNA binding transcription factor activity	GO:0006355//regulation of transcription, DNA-templated
chr7	25597981	25599090	55	143	-1.37851	4.57499e-46	ENSGALG00000011645	2.55983e+21	CDS_down	CLASP1	-	GO:0005828//kinetochore microtubule;GO:0005881//cytoplasmic microtubule;GO:0005813//centrosome;GO:0005794//Golgi apparatus;GO:0070062//extracellular vesicular exosome;GO:0016020//membrane;GO:0000776//kinetochore;GO:0005876//spindle microtubule;GO:0031592//centrosomal corona;GO:0030981//cortical microtubule cytoskeleton;GO:0005938//cell cortex	GO:0043515//kinetochore binding;GO:0051010//microtubule plus-end binding;GO:0005515//protein binding;GO:0005488//binding;GO:0008017//microtubule binding	GO:0034453//microtubule anchoring;GO:0007020//microtubule nucleation;GO:0031023//microtubule organizing center organization;GO:0007026//negative regulation of microtubule depolymerization;GO:0000226//microtubule cytoskeleton organization;GO:0051301//cell division;GO:0031111//negative regulation of microtubule polymerization or depolymerization;GO:0051294//establishment of spindle orientation;GO:0…
chr3	53452537	53453303	30	101	-1.75132	5.04134e-46	ENSGALG00000013829	53452913,53452978,66,66	CDS_down	REPS1	-	GO:0005886//plasma membrane;GO:0005905//coated pit	GO:0005509//calcium ion binding;GO:0005515//protein binding;GO:0017124//SH3 domain binding	GO:0006898//receptor-mediated endocytosis
chr8	2584661	2585515	59	149	-1.33653	1.00299e-45	ENSGALG00000002305	2.58481e+19	CDS_down	ZBTB41	-	GO:0005634//nucleus	GO:0003676//nucleic acid binding;GO:0046872//metal ion binding;GO:0005515//protein binding	-
chr9	8799709	8800563	32	104	-1.70044	1.004e-45	ENSGALG00000004946	8.80013e+19	CDS_down	COL4A4	-	GO:0005581//collagen trimer;GO:0005587//collagen type IV trimer;GO:0005605//basal lamina;GO:0005604//basement membrane	GO:0005201//extracellular matrix structural constituent	GO:0032836//glomerular basement membrane development
chr15	8307556	8308372	88	192	-1.12553	7.50863e-45	ENSGALG00000006430	8.30766e+19	CDS_down	MED15	-	GO:0016592//mediator complex;GO:0016020//membrane;GO:0005634//nucleus	GO:0001104//RNA polymerase II transcription cofactor activity;GO:0003779//actin binding;GO:0005515//protein binding	GO:0006357//regulation of transcription from RNA polymerase II promoter;GO:0006366//transcription from RNA polymerase II promoter;GO:0007010//cytoskeleton organization;GO:0019827//stem cell maintenance
chr10	6490513	6491454	36	110	-1.61143	8.15923e-45	ENSGALG00000004230	6.49067e+19	CDS_down	LIPC	ko01100//Metabolic pathways;ko00564//Glycerophospholipid metabolism;ko00561//Glycerolipid metabolism;ko00592//alpha-Linolenic acid metabolism	GO:0005576//extracellular region;GO:0005615//extracellular space	GO:0003824//catalytic activity;GO:0004806//triglyceride lipase activity;GO:0016787//hydrolase activity;GO:0005515//protein binding;GO:0052689//carboxylic ester hydrolase activity;GO:0016298//lipase activity	GO:0006629//lipid metabolic process;GO:0070328//triglyceride homeostasis;GO:0042632//cholesterol homeostasis;GO:0006633//fatty acid biosynthetic process;GO:0034372//very-low-density lipoprotein particle remodeling;GO:0034374//low-density lipoprotein particle remodeling;GO:0034375//high-density lipoprotein particle remodeling;GO:0019433//triglyceride catabolic process;GO:0008203//cholesterol metab…
chrJH375954.1	3777	6404	84	186	-1.14684	1.13191e-44	ENSGALG00000018703	39634097135135	CDS_down	-	-	-	-	-
chr15	8543256	8544400	54	139	-1.36405	3.37949e-44	ENSGALG00000006648	8543759,8543850,92,92	CDS_down	SPECC1L	-	GO:0005737//cytoplasm;GO:0005819//spindle;GO:0005856//cytoskeleton;GO:0005921//gap junction;GO:0030054//cell junction;GO:0005815//microtubule organizing center;GO:0015630//microtubule cytoskeleton;GO:0015629//actin cytoskeleton;GO:0031941//filamentous actin	GO:0005515//protein binding;GO:0046983//protein dimerization activity	GO:0007049//cell cycle;GO:0051301//cell division;GO:0030036//actin cytoskeleton organization;GO:0016477//cell migration;GO:0030835//negative regulation of actin filament depolymerization;GO:0007026//negative regulation of microtubule depolymerization
chr3	31236667	31237684	67	159	-1.24679	6.35353e-44	ENSGALG00000010554	31237603,31237678,76,76	CDS_down	RMDN2	-	GO:0005737//cytoplasm;GO:0005739//mitochondrion	-	-
chr8	5989965	5991641	100	207	-1.04963	4.96194e-43	ENSGALG00000003955	5.99087e+19	CDS_down	CEP350	-	GO:0005813//centrosome;GO:0016020//membrane;GO:0005737//cytoplasm;GO:0005634//nucleus	GO:0008017//microtubule binding	GO:0034453//microtubule anchoring
chr3	80003805	80004741	28	94	-1.74723	8.78193e-43	ENSGALG00000025895	8.00041e+21	CDS_down	-	-	-	-	-
chr3	74531318	74532166	30	96	-1.67807	1.71132e-41	ENSGALG00000015596	7.45316e+21	CDS_down	MAP3K7	ko04010//MAPK signaling pathway;ko04310//Wnt signaling pathway;ko05145//Toxoplasmosis;ko05162//Measles;ko04620//Toll-like receptor signaling pathway;ko04660//T cell receptor signaling pathway;ko04380//Osteoclast differentiation;ko04520//Adherens junction;ko04622//RIG-I-like receptor signaling pathway;ko05140//Leishmaniasis;ko04621//NOD-like receptor signaling pathway	GO:0005737//cytoplasm;GO:0005634//nucleus;GO:0005671//Ada2/Gcn5/Ada3 transcription activator complex;GO:0008385//IkappaB kinase complex	GO:0000287//magnesium ion binding;GO:0004672//protein kinase activity;GO:0004674//protein serine/threonine kinase activity;GO:0004709//MAP kinase kinase kinase activity;GO:0005524//ATP binding;GO:0016772//transferase activity, transferring phosphorus-containing groups;GO:0004713//protein tyrosine kinase activity;GO:0005515//protein binding;GO:0097110//scaffold protein binding;GO:0004708//MAP kina…	GO:0006468//protein phosphorylation;GO:0007165//signal transduction;GO:0007252//I-kappaB phosphorylation;GO:0000186//activation of MAPKK activity;GO:0000187//activation of MAPK activity;GO:0043123//positive regulation of I-kappaB kinase/NF-kappaB signaling;GO:0007250//activation of NF-kappaB-inducing kinase activity;GO:0032743//positive regulation of interleukin-2 production;GO:0002726//positive …
chr5	26856500	26857664	75	167	-1.15489	8.6632e-41	ENSGALG00000020449	2.68573e+21	CDS_down	COX16	-	GO:0031966//mitochondrial membrane;GO:0005739//mitochondrion	-	-
chr4	64383756	64384884	62	147	-1.24548	1.42304e-40	ENSGALG00000013728	6.43842e+21	CDS_down	PPAT	ko01100//Metabolic pathways;ko00230//Purine metabolism;ko00250//Alanine, aspartate and glutamate metabolism	-	GO:0004044//amidophosphoribosyltransferase activity;GO:0016740//transferase activity;GO:0016757//transferase activity, transferring glycosyl groups;GO:0046872//metal ion binding;GO:0051536//iron-sulfur cluster binding	GO:0006164//purine nucleotide biosynthetic process;GO:0006189//'de novo' IMP biosynthetic process;GO:0008152//metabolic process;GO:0009113//purine nucleobase biosynthetic process;GO:0009116//nucleoside metabolic process
chr4	33310084	33310843	44	118	-1.42321	3.98427e-40	ENSGALG00000023355	33310254,33310266,13,13	CDS_down	TMEM154	-	-	-	-
chr7	1101255	1102141	44	118	-1.42321	3.98427e-40	ENSGALG00000002632	1.10175e+19	CDS_down	CALCRL	ko04080//Neuroactive ligand-receptor interaction;ko04270//Vascular smooth muscle contraction	GO:0005886//plasma membrane;GO:0016020//membrane;GO:0016021//integral component of membrane;GO:0005783//endoplasmic reticulum;GO:0005768//endosome;GO:0005764//lysosome	GO:0004871//signal transducer activity;GO:0004888//transmembrane signaling receptor activity;GO:0004930//G-protein coupled receptor activity;GO:0004948//calcitonin receptor activity;GO:0005515//protein binding;GO:0008565//protein transporter activity;GO:0001605//adrenomedullin receptor activity;GO:0001635//calcitonin gene-related polypeptide receptor activity	GO:0007165//signal transduction;GO:0007166//cell surface receptor signaling pathway;GO:0007186//G-protein coupled receptor signaling pathway;GO:0015031//protein transport;GO:0001525//angiogenesis;GO:0006171//cAMP biosynthetic process;GO:0006816//calcium ion transport;GO:0071329//cellular response to sucrose stimulus;GO:0031623//receptor internalization;GO:0030819//positive regulation of cAMP bios…
chrAADN03010982.1	475	1499	37	106	-1.51847	9.56313e-40	ENSGALG00000028379	8041697894696	CDS_down	-	-	-	-	-
chr5	26495915	26497382	55	135	-1.29546	1.0137e-39	ENSGALG00000000296	2.64964e+21	CDS_down	PCNX	-	GO:0016021//integral component of membrane	-	-
chr5	38506810	38507763	34	101	-1.57075	1.11574e-39	ENSGALG00000010459	38506905,38506943,39,39	CDS_down	VIPAS39	-	GO:0005737//cytoplasm;GO:0055037//recycling endosome;GO:0005769//early endosome;GO:0030897//HOPS complex;GO:0005770//late endosome	GO:0005515//protein binding	GO:0006886//intracellular protein transport;GO:0008333//endosome to lysosome transport
chr3	21994824	21995805	30	94	-1.6477	1.1203e-39	ENSGALG00000009881	2.1995e+21	CDS_down	HHAT	-	GO:0016020//membrane;GO:0016021//integral component of membrane	GO:0016409//palmitoyltransferase activity	GO:0018345//protein palmitoylation;GO:0007224//smoothened signaling pathway
chr20	11087223	11088390	60	142	-1.24286	3.54889e-39	ENSGALG00000007246	11088239,11088311,73,73	CDS_down	ELMO2	-	GO:0005856//cytoskeleton;GO:0016020//membrane;GO:0005829//cytosol	GO:0005488//binding;GO:0005515//protein binding;GO:0030971//receptor tyrosine kinase binding	GO:0006909//phagocytosis;GO:0060326//cell chemotaxis
chr7	25972124	25973163	76	166	-1.12711	4.96225e-39	ENSGALG00000011677	2.59724e+21	CDS_down	HSPBAP1	-	-	-	-
chr8	22813226	22814198	40	110	-1.45943	5.9926e-39	ENSGALG00000010536	22813297,22813343,47,47	CDS_down	FAF1	-	GO:0005829//cytosol;GO:0005634//nucleus;GO:0048471//perinuclear region of cytoplasm;GO:0034098//Cdc48p-Npl4p-Ufd1p AAA ATPase complex;GO:0005737//cytoplasm;GO:0005635//nuclear envelope	GO:0005515//protein binding;GO:0031072//heat shock protein binding;GO:0031625//ubiquitin protein ligase binding;GO:0043130//ubiquitin binding;GO:0019901//protein kinase binding;GO:0051059//NF-kappaB binding;GO:0019904//protein domain specific binding	GO:0042176//regulation of protein catabolic process;GO:0008219//cell death;GO:0007253//cytoplasmic sequestering of NF-kappaB;GO:0031334//positive regulation of protein complex assembly;GO:0030155//regulation of cell adhesion;GO:1902043//positive regulation of extrinsic apoptotic signaling pathway via death domain receptors
chr4	73270986	73271687	55	134	-1.28473	7.08751e-39	ENSGALG00000014391	7.32711e+21	CDS_down	CCDC149	-	-	-	-
chr5	11878058	11879148	77	167	-1.11692	1.41713e-38	ENSGALG00000006266	1.18786e+21	CDS_down	HPS5	-	GO:0031084//BLOC-2 complex	GO:0005515//protein binding	GO:0043473//pigmentation;GO:0007596//blood coagulation;GO:0006996//organelle organization
chr3	67029794	67031186	73	161	-1.14109	1.435e-38	ENSGALG00000015308	67030489,67030587,99,99	CDS_down	SEC63	ko04141//Protein processing in endoplasmic reticulum;ko03060//Protein export	GO:0005622//intracellular;GO:0016020//membrane	GO:0008565//protein transporter activity;GO:0005488//binding;GO:0005515//protein binding	GO:0031204//posttranslational protein targeting to membrane, translocation;GO:0006614//SRP-dependent cotranslational protein targeting to membrane;GO:0006620//posttranslational protein targeting to membrane;GO:0001889//liver development;GO:0010259//multicellular organismal aging;GO:0072001//renal system development;GO:0006807//nitrogen compound metabolic process
chrZ	21118911	21120103	91	187	-1.0391	2.35302e-38	ENSGALG00000014784	21119838,21119923,86,86	CDS_down	MAST4	-	-	GO:0000166//nucleotide binding;GO:0000287//magnesium ion binding;GO:0004672//protein kinase activity;GO:0004674//protein serine/threonine kinase activity;GO:0005524//ATP binding;GO:0016301//kinase activity;GO:0016740//transferase activity;GO:0016772//transferase activity, transferring phosphorus-containing groups;GO:0005515//protein binding;GO:0004713//protein tyrosine kinase activity	GO:0006468//protein phosphorylation;GO:0016310//phosphorylation
chr7	9285060	9285987	62	144	-1.21573	2.93793e-38	ENSGALG00000007924	9.28564e+19	CDS_down	STK17B	-	GO:0005634//nucleus;GO:0005634//nucleus	GO:0004672//protein kinase activity;GO:0004674//protein serine/threonine kinase activity;GO:0005524//ATP binding;GO:0016772//transferase activity, transferring phosphorus-containing groups;GO:0004713//protein tyrosine kinase activity	GO:0006468//protein phosphorylation;GO:0035556//intracellular signal transduction;GO:2000271//positive regulation of fibroblast apoptotic process;GO:0035556//intracellular signal transduction;GO:2000271//positive regulation of fibroblast apoptotic process
chr3	78975148	78976320	67	151	-1.17232	5.35539e-38	ENSGALG00000015889	7.89755e+21	CDS_down	PHIP	-	GO:0070062//extracellular vesicular exosome;GO:0005634//nucleus	GO:0005158//insulin receptor binding;GO:0005515//protein binding;GO:0070577//lysine-acetylated histone binding	GO:0008286//insulin receptor signaling pathway;GO:0045944//positive regulation of transcription from RNA polymerase II promoter;GO:0022604//regulation of cell morphogenesis;GO:0007010//cytoskeleton organization;GO:2001237//negative regulation of extrinsic apoptotic signaling pathway;GO:0008284//positive regulation of cell proliferation;GO:0006606//protein import into nucleus;GO:0033138//positive …
chr4	85027293	85028193	45	117	-1.37851	5.41679e-38	ENSGALG00000015765	85027311,85027397,87,87	CDS_down	POLR1A	ko01100//Metabolic pathways;ko00230//Purine metabolism;ko00240//Pyrimidine metabolism;ko03020//RNA polymerase	GO:0005634//nucleus;GO:0005736//DNA-directed RNA polymerase I complex;GO:0005730//nucleolus;GO:0005737//cytoplasm;GO:0005736//DNA-directed RNA polymerase I complex	GO:0003677//DNA binding;GO:0003899//DNA-directed RNA polymerase activity;GO:0008270//zinc ion binding;GO:0016740//transferase activity;GO:0016779//nucleotidyltransferase activity;GO:0001054//RNA polymerase I activity;GO:0005515//protein binding	GO:0006351//transcription, DNA-templated;GO:0006360//transcription from RNA polymerase I promoter
chr19	5149969	5151126	71	157	-1.14487	5.84176e-38	ENSGALG00000002653	5150648,5150721,74,74	CDS_down	C19H17ORF85	-	-	GO:0000166//nucleotide binding	-
chr7	20648922	20649827	34	99	-1.54189	6.22537e-38	ENSGALG00000011110	2.06495e+21	CDS_down	DPP4	-	GO:0016020//membrane;GO:0070062//extracellular vesicular exosome;GO:0005886//plasma membrane;GO:0009986//cell surface;GO:0005925//focal adhesion;GO:0030027//lamellipodium;GO:0005765//lysosomal membrane;GO:0071438//invadopodium membrane;GO:0016324//apical plasma membrane;GO:0030139//endocytic vesicle;GO:0046581//intercellular canaliculus	GO:0004252//serine-type endopeptidase activity;GO:0008236//serine-type peptidase activity;GO:0042802//identical protein binding;GO:0005515//protein binding;GO:0042803//protein homodimerization activity;GO:0005102//receptor binding;GO:0002020//protease binding;GO:0008239//dipeptidyl-peptidase activity	GO:0006508//proteolysis;GO:0001666//response to hypoxia;GO:0008284//positive regulation of cell proliferation;GO:0042110//T cell activation;GO:0010716//negative regulation of extracellular matrix disassembly;GO:0033632//regulation of cell-cell adhesion mediated by integrin;GO:0043542//endothelial cell migration;GO:0031295//T cell costimulation
chrJH375207.1	7458	8800	47	120	-1.3523	7.44772e-38	ENSGALG00000024340	81628437276276	CDS_down	-	-	GO:0016020//membrane;GO:0016021//integral component of membrane;GO:0042612//MHC class I protein complex;GO:0042613//MHC class II protein complex	GO:0042605//peptide antigen binding;GO:0005515//protein binding	GO:0001916//positive regulation of T cell mediated cytotoxicity;GO:0002474//antigen processing and presentation of peptide antigen via MHC class I;GO:0006955//immune response;GO:0019882//antigen processing and presentation
chr6	3753175	3753911	39	107	-1.45606	8.37885e-38	ENSGALG00000002370	3.75368e+19	CDS_down	SH2D4B	-	-	-	-
chr5	33714566	33715829	65	147	-1.1773	3.31067e-37	ENSGALG00000009972	3.37147e+21	CDS_down	HEATR5A	-	-	GO:0005488//binding	-
chr7	34070268	34071148	63	144	-1.19265	4.43794e-37	ENSGALG00000012448	34070788,34070864,77,77	CDS_down	ORC4	ko04110//Cell cycle	GO:0000808//origin recognition complex;GO:0005634//nucleus;GO:0005664//nuclear origin of replication recognition complex	GO:0000166//nucleotide binding;GO:0003677//DNA binding;GO:0005524//ATP binding;GO:0017111//nucleoside-triphosphatase activity;GO:0005515//protein binding;GO:0003688//DNA replication origin binding	GO:0006260//DNA replication;GO:0006270//DNA replication initiation
chr3	75434113	75435063	47	118	-1.32805	2.90157e-36	ENSGALG00000015787	75434982,75435105,124,82	CDS_down	RNGTT	ko03015//mRNA surveillance pathway	GO:0005634//nucleus	GO:0004484//mRNA guanylyltransferase activity;GO:0004651//polynucleotide 5'-phosphatase activity;GO:0004725//protein tyrosine phosphatase activity;GO:0008138//protein tyrosine/serine/threonine phosphatase activity;GO:0016787//hydrolase activity;GO:0016791//phosphatase activity;GO:0003910//DNA ligase (ATP) activity;GO:0005524//ATP binding;GO:0050355//triphosphatase activity;GO:0008192//RNA guanyly…	GO:0006370//7-methylguanosine mRNA capping;GO:0006397//mRNA processing;GO:0006470//protein dephosphorylation;GO:0016311//dephosphorylation;GO:0035335//peptidyl-tyrosine dephosphorylation;GO:0098507//polynucleotide 5' dephosphorylation;GO:0006281//DNA repair;GO:0006310//DNA recombination;GO:0006396//RNA processing
chr4	8987961	8988987	47	118	-1.32805	2.90157e-36	ENSGALG00000007097	8.98818e+19	CDS_down	RPS6KA6	ko04010//MAPK signaling pathway;ko04722//Neurotrophin signaling pathway;ko04114//Oocyte meiosis;ko04914//Progesterone-mediated oocyte maturation;ko04720//Long-term potentiation;ko04150//mTOR signaling pathway	GO:0016020//membrane	GO:0000166//nucleotide binding;GO:0000287//magnesium ion binding;GO:0004672//protein kinase activity;GO:0004674//protein serine/threonine kinase activity;GO:0005524//ATP binding;GO:0016301//kinase activity;GO:0016740//transferase activity;GO:0016772//transferase activity, transferring phosphorus-containing groups;GO:0016773//phosphotransferase activity, alcohol group as acceptor;GO:0004713//prote…	GO:0006468//protein phosphorylation;GO:0016310//phosphorylation;GO:0035556//intracellular signal transduction;GO:0009103//lipopolysaccharide biosynthetic process;GO:0006978//DNA damage response, signal transduction by p53 class mediator resulting in transcription of p21 class mediator
chr9	10108525	10109716	47	118	-1.32805	2.90157e-36	ENSGALG00000002612	1.01094e+21	CDS_down	U2SURP	ko03040//Spliceosome	GO:0005634//nucleus	GO:0000166//nucleotide binding;GO:0003676//nucleic acid binding;GO:0003723//RNA binding;GO:0005515//protein binding	GO:0006396//RNA processing
chr3	58532938	58533723	49	121	-1.30415	4.32357e-36	ENSGALG00000014823	5.85333e+21	CDS_down	C6orf58	-	GO:0070062//extracellular vesicular exosome	-	-
chrZ	60825086	60826340	66	147	-1.15528	4.5726e-36	ENSGALG00000015641	6.08253e+21	CDS_down	CCNH	ko04110//Cell cycle;ko03420//Nucleotide excision repair;ko03022//Basal transcription factors	GO:0016591//DNA-directed RNA polymerase II, holoenzyme;GO:0070985//TFIIK complex;GO:0005634//nucleus;GO:0005675//holo TFIIH complex;GO:0019907//cyclin-dependent protein kinase activating kinase holoenzyme complex	GO:0016538//cyclin-dependent protein serine/threonine kinase regulator activity;GO:0019901//protein kinase binding;GO:0005515//protein binding;GO:0008094//DNA-dependent ATPase activity;GO:0008353//RNA polymerase II carboxy-terminal domain kinase activity;GO:0016301//kinase activity	GO:0000079//regulation of cyclin-dependent protein serine/threonine kinase activity;GO:0006351//transcription, DNA-templated;GO:0006355//regulation of transcription, DNA-templated;GO:0051726//regulation of cell cycle;GO:0006366//transcription from RNA polymerase II promoter;GO:0045944//positive regulation of transcription from RNA polymerase II promoter;GO:0006200//ATP catabolic process;GO:000646…
chr19	6693123	6694075	84	173	-1.04231	1.10644e-35	ENSGALG00000004660	6.69314e+19	CDS_down	TRPV3	-	GO:0016021//integral component of membrane;GO:0043235//receptor complex;GO:0016020//membrane	GO:0005216//ion channel activity;GO:0005515//protein binding;GO:0005261//cation channel activity	GO:0006811//ion transport;GO:0009266//response to temperature stimulus;GO:0034220//ion transmembrane transport;GO:0042636//negative regulation of hair cycle
chrZ	45719742	45720638	91	183	-1.00791	1.25569e-35	ENSGALG00000000208	4.572e+21	CDS_down	MCC	-	GO:0005737//cytoplasm;GO:0005886//plasma membrane;GO:0005634//nucleus	GO:0005509//calcium ion binding;GO:0000166//nucleotide binding;GO:0005515//protein binding	GO:0090090//negative regulation of canonical Wnt signaling pathway;GO:0010633//negative regulation of epithelial cell migration;GO:0050680//negative regulation of epithelial cell proliferation
chr6	24221293	24222399	60	137	-1.19114	1.59948e-35	ENSGALG00000008434	2.42223e+21	CDS_down	SORCS3	-	GO:0016020//membrane;GO:0016021//integral component of membrane;GO:0097481//neuronal postsynaptic density	GO:0005515//protein binding	GO:0007612//learning;GO:0007613//memory;GO:1900452//regulation of long term synaptic depression
chr3	16119858	16121504	65	144	-1.14756	5.53175e-35	ENSGALG00000009130	1.61199e+21	CDS_down	-	-	-	GO:0008081//phosphoric diester hydrolase activity;GO:0008889//glycerophosphodiester phosphodiesterase activity;GO:0030246//carbohydrate binding;GO:2001070//starch binding	GO:0006071//glycerol metabolic process;GO:0006629//lipid metabolic process
chr10	6857338	6858255	63	141	-1.16227	5.71533e-35	ENSGALG00000004294	6.85631e+20	CDS_down	CGNL1	-	GO:0016459//myosin complex;GO:0005923//tight junction;GO:0015629//actin cytoskeleton;GO:0043296//apical junction complex	GO:0003774//motor activity	GO:0008152//metabolic process
chr4	85729281	85730600	54	127	-1.2338	7.48678e-35	ENSGALG00000015961	8.57299e+21	CDS_down	SUCLG1	ko01100//Metabolic pathways;ko00640//Propanoate metabolism;ko00020//Citrate cycle (TCA cycle)	GO:0070062//extracellular vesicular exosome;GO:0005739//mitochondrion;GO:0005743//mitochondrial inner membrane	GO:0003824//catalytic activity;GO:0003878//ATP citrate synthase activity;GO:0004775//succinate-CoA ligase (ADP-forming) activity;GO:0016874//ligase activity;GO:0048037//cofactor binding	GO:0008152//metabolic process
chr7	4362742	4363444	44	111	-1.33498	1.58791e-34	ENSGALG00000003578	4.3631e+19	CDS_down	FN1	ko05200//Pathways in cancer;ko04810//Regulation of actin cytoskeleton;ko04510//Focal adhesion;ko05146//Amoebiasis;ko05222//Small cell lung cancer;ko04512//ECM-receptor interaction;ko05100//Bacterial invasion of epithelial cells	GO:0005576//extracellular region;GO:0031012//extracellular matrix;GO:0005615//extracellular space;GO:0070062//extracellular vesicular exosome;GO:0072562//blood microparticle;GO:0005577//fibrinogen complex;GO:0005793//endoplasmic reticulum-Golgi intermediate compartment;GO:0005604//basement membrane;GO:0016324//apical plasma membrane;GO:0005605//basal lamina;GO:0005576//extracellular region	GO:0005515//protein binding;GO:0002020//protease binding;GO:0005178//integrin binding;GO:0016504//peptidase activator activity;GO:0005515//protein binding	GO:0018149//peptide cross-linking;GO:0035987//endodermal cell differentiation;GO:0034446//substrate adhesion-dependent cell spreading;GO:0033622//integrin activation;GO:0045773//positive regulation of axon extension;GO:0042060//wound healing;GO:0007155//cell adhesion;GO:0007160//cell-matrix adhesion;GO:0007044//cell-substrate junction assembly;GO:0010952//positive regulation of peptidase activity…
chr5	53073467	53074673	77	161	-1.06413	1.82312e-34	ENSGALG00000011811	5.30736e+21	CDS_down	SYNE2	-	GO:0016021//integral component of membrane;GO:0016020//membrane;GO:0005739//mitochondrion;GO:0005737//cytoplasm;GO:0005634//nucleus;GO:0016529//sarcoplasmic reticulum;GO:0005635//nuclear envelope;GO:0031527//filopodium membrane;GO:0005925//focal adhesion;GO:0031965//nuclear membrane;GO:0016235//aggresome;GO:0045111//intermediate filament cytoskeleton;GO:0031981//nuclear lumen;GO:0031258//lamellip…	GO:0003779//actin binding;GO:0005515//protein binding	GO:0016192//vesicle-mediated transport;GO:0007097//nuclear migration;GO:0051642//centrosome localization;GO:0090286//cytoskeletal anchoring at nuclear membrane;GO:0010761//fibroblast migration;GO:0034504//protein localization to nucleus;GO:0007163//establishment or maintenance of cell polarity;GO:0030335//positive regulation of cell migration;GO:0006998//nuclear envelope organization;GO:0031022//…
chr5	8535318	8536481	36	98	-1.44478	1.97586e-34	ENSGALG00000005716	8.53623e+19	CDS_down	SBF2	-	GO:0016020//membrane;GO:0005774//vacuolar membrane	GO:0016791//phosphatase activity;GO:0005515//protein binding;GO:0017112//Rab guanyl-nucleotide exchange factor activity;GO:0042803//protein homodimerization activity;GO:0035091//phosphatidylinositol binding;GO:0019902//phosphatase binding;GO:0019208//phosphatase regulator activity	GO:0016311//dephosphorylation;GO:0032851//positive regulation of Rab GTPase activity;GO:0051262//protein tetramerization
chr10	6472496	6473659	76	159	-1.06496	3.76385e-34	ENSGALG00000004212	6.47313e+19	CDS_down	ADAM10	-	GO:0005794//Golgi apparatus;GO:0070062//extracellular vesicular exosome;GO:0016020//membrane;GO:0009986//cell surface;GO:0097197//tetraspanin-enriched microdomain;GO:0005925//focal adhesion;GO:0097038//perinuclear endoplasmic reticulum;GO:0005798//Golgi-associated vesicle;GO:0005634//nucleus;GO:0005737//cytoplasm;GO:0014069//postsynaptic density	GO:0004222//metalloendopeptidase activity;GO:0008237//metallopeptidase activity;GO:0008270//zinc ion binding;GO:0005515//protein binding;GO:0042803//protein homodimerization activity;GO:0019901//protein kinase binding;GO:0004175//endopeptidase activity;GO:0004222//metalloendopeptidase activity;GO:0008237//metallopeptidase activity;GO:0008270//zinc ion binding	GO:0006508//proteolysis;GO:0006509//membrane protein ectodomain proteolysis;GO:0007219//Notch signaling pathway;GO:0008284//positive regulation of cell proliferation;GO:0034612//response to tumor necrosis factor;GO:0030307//positive regulation of cell growth;GO:0030335//positive regulation of cell migration;GO:0051089//constitutive protein ectodomain proteolysis;GO:0051088//PMA-inducible membrane…
chr3	66246197	66247516	72	153	-1.08746	4.43066e-34	ENSGALG00000015070	6.62465e+21	CDS_down	FIG4	-	GO:0010008//endosome membrane	GO:0042578//phosphoric ester hydrolase activity;GO:0005515//protein binding;GO:0042578//phosphoric ester hydrolase activity	GO:0007626//locomotory behavior;GO:0043473//pigmentation;GO:0046488//phosphatidylinositol metabolic process;GO:0048666//neuron development;GO:0031642//negative regulation of myelination;GO:0032288//myelin assembly;GO:0007033//vacuole organization;GO:0008152//metabolic process
chr3	109671457	109672702	38	101	-1.41028	5.26323e-34	ENSGALG00000016720	109672682,109672718,37,21	CDS_down	CD2AP	-	GO:0070062//extracellular vesicular exosome;GO:0001726//ruffle;GO:0031941//filamentous actin;GO:0005737//cytoplasm;GO:0005886//plasma membrane;GO:0005911//cell-cell junction	GO:0005515//protein binding;GO:0005515//protein binding;GO:0017124//SH3 domain binding	GO:1900182//positive regulation of protein localization to nucleus;GO:2000249//regulation of actin cytoskeleton reorganization;GO:0032911//negative regulation of transforming growth factor beta1 production
chr9	13404662	13405747	47	115	-1.2909	5.51647e-34	ENSGALG00000025821	1.34054e+21	CDS_down	CLDN16	ko05160//Hepatitis C;ko04530//Tight junction;ko04670//Leukocyte transendothelial migration;ko04514//Cell adhesion molecules (CAMs);ko05130//Pathogenic Escherichia coli infection	GO:0005886//plasma membrane;GO:0005923//tight junction;GO:0016020//membrane;GO:0016021//integral component of membrane;GO:0030054//cell junction	GO:0005198//structural molecule activity;GO:0005515//protein binding	-
chr3	74834572	74835339	75	157	-1.0658	7.76778e-34	ENSGALG00000015611	7.48348e+21	CDS_down	CASP8AP2	-	-	GO:0003677//DNA binding;GO:0005515//protein binding;GO:0042802//identical protein binding;GO:0008656//cysteine-type endopeptidase activator activity involved in apoptotic process;GO:0002020//protease binding	GO:0006919//activation of cysteine-type endopeptidase activity involved in apoptotic process;GO:0008625//extrinsic apoptotic signaling pathway via death domain receptors
chr5	8219129	8220232	67	145	-1.11382	9.92051e-34	ENSGALG00000005618	8.2198e+19	CDS_down	CTR9	-	GO:0016593//Cdc73/Paf1 complex;GO:0005634//nucleus;GO:0035327//transcriptionally active chromatin	GO:0005515//protein binding;GO:0042169//SH2 domain binding	GO:0045944//positive regulation of transcription from RNA polymerase II promoter;GO:0032968//positive regulation of transcription elongation from RNA polymerase II promoter;GO:2001162//positive regulation of histone H3-K79 methylation;GO:0033523//histone H2B ubiquitination;GO:0010390//histone monoubiquitination;GO:0019827//stem cell maintenance;GO:0080182//histone H3-K4 trimethylation;GO:0051571/…
chr10	9903714	9904664	44	110	-1.32193	1.15802e-33	ENSGALG00000004984	9.90353e+19	CDS_down	SECISBP2L	-	-	-	-
chr7	14945404	14946430	42	107	-1.34915	1.2438e-33	ENSGALG00000009172	1.49461e+21	CDS_down	OSBPL6	-	GO:0005829//cytosol;GO:0005886//plasma membrane;GO:0031965//nuclear membrane;GO:0097038//perinuclear endoplasmic reticulum	GO:0005515//protein binding	GO:0006810//transport;GO:0006869//lipid transport
chr7	23923683	23924672	59	133	-1.17264	1.42237e-33	ENSGALG00000011577	2.39242e+21	CDS_down	CNTNAP5	-	GO:0016020//membrane;GO:0016021//integral component of membrane	GO:0005515//protein binding	GO:0007155//cell adhesion
chr3	80256012	80257100	74	155	-1.06667	1.60251e-33	ENSGALG00000015908	8.02563e+21	CDS_down	COL12A1	-	GO:0005581//collagen trimer;GO:0031012//extracellular matrix;GO:0005615//extracellular space;GO:0070062//extracellular vesicular exosome;GO:0031982//vesicle	GO:0005515//protein binding	GO:0035987//endodermal cell differentiation
chrLGE64	293511	294430	33	92	-1.47917	1.66751e-33	ENSGALG00000024408	293846,293933,88,88	CDS_down	-	-	-	GO:0005515//protein binding	-
chr8	6349034	6350709	38	100	-1.39593	2.92361e-33	ENSGALG00000004273	6350258,6350341,84,84	CDS_down	RALGPS1	-	GO:0005622//intracellular;GO:0005737//cytoplasm;GO:0005886//plasma membrane;GO:0016020//membrane	GO:0005085//guanyl-nucleotide exchange factor activity	GO:0007264//small GTPase mediated signal transduction;GO:0043547//positive regulation of GTPase activity
chr14	12480305	12481344	71	150	-1.07907	3.80219e-33	ENSGALG00000007686	1.2481e+21	CDS_down	TRAP1	-	GO:0005739//mitochondrion;GO:0070062//extracellular vesicular exosome;GO:0016020//membrane;GO:0005634//nucleus;GO:0005759//mitochondrial matrix;GO:0005743//mitochondrial inner membrane	GO:0005524//ATP binding;GO:0051082//unfolded protein binding;GO:0005515//protein binding;GO:0019901//protein kinase binding	GO:0006457//protein folding;GO:0006950//response to stress;GO:1901856//negative regulation of cellular respiration
chr10	2983126	2984143	47	114	-1.2783	3.84896e-33	ENSGALG00000002952	2.98312e+19	CDS_down	NRG4	-	-	GO:0005515//protein binding	-
chr3	13605488	13606507	47	114	-1.2783	3.84896e-33	ENSGALG00000008875	13605602,13605688,87,87	CDS_down	PLCB1	ko01100//Metabolic pathways;ko04020//Calcium signaling pathway;ko05016//Huntington's disease;ko05010//Alzheimer's disease;ko04310//Wnt signaling pathway;ko04062//Chemokine signaling pathway;ko04270//Vascular smooth muscle contraction;ko04916//Melanogenesis;ko05142//Chagas disease (American trypanosomiasis);ko04912//GnRH signaling pathway;ko05146//Amoebiasis;ko04540//Gap junction;ko04070//Phosphat…	GO:0005634//nucleus;GO:0005737//cytoplasm;GO:0070062//extracellular vesicular exosome;GO:0016607//nuclear speck;GO:0000790//nuclear chromatin	GO:0004435//phosphatidylinositol phospholipase C activity;GO:0004871//signal transducer activity;GO:0005509//calcium ion binding;GO:0008081//phosphoric diester hydrolase activity;GO:0016787//hydrolase activity;GO:0005515//protein binding;GO:0005096//GTPase activator activity;GO:0005516//calmodulin binding;GO:0019899//enzyme binding;GO:0005546//phosphatidylinositol-4,5-bisphosphate binding;GO:0005…	GO:0006629//lipid metabolic process;GO:0007165//signal transduction;GO:0007420//brain development;GO:0016042//lipid catabolic process;GO:0035556//intracellular signal transduction;GO:0051726//regulation of cell cycle;GO:0043547//positive regulation of GTPase activity;GO:0046330//positive regulation of JNK cascade;GO:0070498//interleukin-1-mediated signaling pathway;GO:0035723//interleukin-15-medi…
chrJH375951.1	23092	25507	82	166	-1.01749	3.86974e-33	ENSGALG00000018816	2349423772279270	CDS_down	-	-	-	-	-
chr8	2587502	2589104	77	159	-1.0461	3.95126e-33	ENSGALG00000002305	2.5883e+19	CDS_down	ZBTB41	-	GO:0005634//nucleus	GO:0003676//nucleic acid binding;GO:0046872//metal ion binding;GO:0005515//protein binding	-
chr5	51687055	51688066	45	110	-1.28951	2.25486e-32	ENSGALG00000011639	5.1687e+21	CDS_down	CEP170B	-	-	GO:0005515//protein binding	-
chr4	58244378	58245366	51	119	-1.22239	2.7827e-32	ENSGALG00000012219	5.82449e+21	CDS_down	UNC5C	-	GO:0005886//plasma membrane	GO:0005515//protein binding;GO:0005515//protein binding;GO:0005042//netrin receptor activity	GO:0007165//signal transduction;GO:0007165//signal transduction;GO:0007420//brain development;GO:0007411//axon guidance;GO:0030334//regulation of cell migration;GO:0043065//positive regulation of apoptotic process;GO:0033564//anterior/posterior axon guidance;GO:0038007//netrin-activated signaling pathway
chr5	29580033	29580900	46	111	-1.27085	3.67237e-32	ENSGALG00000009705	29580413,29580491,79,79	CDS_down	RYR3	ko04020//Calcium signaling pathway;ko05010//Alzheimer's disease;ko04970//Salivary secretion	GO:0016020//membrane;GO:0016021//integral component of membrane;GO:0030314//junctional membrane complex;GO:0033017//sarcoplasmic reticulum membrane	GO:0005216//ion channel activity;GO:0005219//ryanodine-sensitive calcium-release channel activity;GO:0005262//calcium channel activity;GO:0005509//calcium ion binding;GO:0005515//protein binding;GO:0015278//calcium-release channel activity	GO:0006810//transport;GO:0006811//ion transport;GO:0006874//cellular calcium ion homeostasis;GO:0055085//transmembrane transport;GO:0070588//calcium ion transmembrane transport;GO:0006816//calcium ion transport;GO:0006941//striated muscle contraction
chr6	24666913	24667721	40	101	-1.33628	1.63985e-31	ENSGALG00000008465	24667050,24667103,54,54	CDS_down	SORCS1	-	GO:0016020//membrane;GO:0016021//integral component of membrane	GO:0005515//protein binding	-
chrZ	63563771	63565663	51	118	-1.21022	1.80373e-31	ENSGALG00000015603	6.3565e+21	CDS_down	ZCCHC9	-	-	GO:0003676//nucleic acid binding;GO:0008270//zinc ion binding;GO:0046872//metal ion binding	GO:0010923//negative regulation of phosphatase activity
chrZ	11338778	11339686	39	99	-1.34395	3.01289e-31	ENSGALG00000003631	11339371,11339401,31,31	CDS_down	C5orf42	-	-	-	-
chr4	33763572	33764518	60	131	-1.12653	3.29893e-31	ENSGALG00000010185	3.37638e+21	CDS_down	HSPA4L	ko04141//Protein processing in endoplasmic reticulum	GO:0005829//cytosol	GO:0000166//nucleotide binding;GO:0005524//ATP binding;GO:0005515//protein binding	GO:0000902//cell morphogenesis
chrZ	78243051	78244262	76	154	-1.01886	6.7138e-31	ENSGALG00000026520	7.82437e+21	CDS_down	-	-	GO:0005634//nucleus	GO:0003677//DNA binding;GO:0003700//sequence-specific DNA binding transcription factor activity	GO:0006355//regulation of transcription, DNA-templated
chr4	82771089	82772458	74	151	-1.02895	7.39595e-31	ENSGALG00000022958	82771478,82771566,89,89	CDS_down	-	-	-	-	-
chr20	12426861	12427677	53	120	-1.17897	8.64522e-31	ENSGALG00000020895	1.2427e+21	CDS_down	-	-	-	-	-
chr5	45711828	45713300	59	129	-1.12858	1.02165e-30	ENSGALG00000011085	4.57131e+21	CDS_down	ATG2B	-	GO:0000407//pre-autophagosomal structure;GO:0019898//extrinsic component of membrane	-	GO:0000045//autophagic vacuole assembly;GO:0000422//mitochondrion degradation;GO:0006914//autophagy;GO:0006995//cellular response to nitrogen starvation;GO:0044804
chrJH376399.1	913	3192	46	109	-1.24462	1.69601e-30	ENSGALG00000013504	21962537342342	CDS_down	CHIR-B2	-	-	-	-
chr8	12946780	12947618	66	139	-1.07455	1.73128e-30	ENSGALG00000005911	1.29469e+21	CDS_down	MTF2	-	GO:0005737//cytoplasm;GO:0005634//nucleus;GO:0035098//ESC/E(Z) complex	GO:0008270//zinc ion binding;GO:0046872//metal ion binding;GO:0005515//protein binding;GO:0035064//methylated histone binding	GO:0048863//stem cell differentiation;GO:0045944//positive regulation of transcription from RNA polymerase II promoter;GO:0000122//negative regulation of transcription from RNA polymerase II promoter;GO:0019827//stem cell maintenance;GO:0007379//segment specification;GO:0061086//negative regulation of histone H3-K27 methylation;GO:0061087//positive regulation of histone H3-K27 methylation
chr3	15987384	15988153	58	127	-1.1307	2.07293e-30	ENSGALG00000013224	1.59874e+21	CDS_down	SOS1	ko05200//Pathways in cancer;ko04010//MAPK signaling pathway;ko04810//Regulation of actin cytoskeleton;ko04510//Focal adhesion;ko04630//Jak-STAT signaling pathway;ko04062//Chemokine signaling pathway;ko04910//Insulin signaling pathway;ko05160//Hepatitis C;ko04722//Neurotrophin signaling pathway;ko05215//Prostate cancer;ko04912//GnRH signaling pathway;ko04012//ErbB signaling pathway;ko04660//T cell…	GO:0005622//intracellular	GO:0003677//DNA binding;GO:0005085//guanyl-nucleotide exchange factor activity;GO:0005089//Rho guanyl-nucleotide exchange factor activity;GO:0046982//protein heterodimerization activity;GO:0005515//protein binding;GO:0005088//Ras guanyl-nucleotide exchange factor activity	GO:0007264//small GTPase mediated signal transduction;GO:0032321//positive regulation of Rho GTPase activity;GO:0035023//regulation of Rho protein signal transduction;GO:0043547//positive regulation of GTPase activity;GO:0051056//regulation of small GTPase mediated signal transduction;GO:0032320//positive regulation of Ras GTPase activity
chr3	60689256	60690222	51	116	-1.18556	5.3448e-30	ENSGALG00000027036	60690165,60690247,83,58	CDS_down	PKIB	-	-	GO:0004862//cAMP-dependent protein kinase inhibitor activity	GO:0006469//negative regulation of protein kinase activity;GO:0071901//negative regulation of protein serine/threonine kinase activity;GO:2000480//negative regulation of cAMP-dependent protein kinase activity
chr17	8782503	8783680	56	123	-1.13516	1.30227e-29	ENSGALG00000001253	8.7835e+19	CDS_down	RC3H2	-	GO:0016020//membrane;GO:0005737//cytoplasm;GO:0005634//nucleus;GO:0009986//cell surface	GO:0008270//zinc ion binding;GO:0046872//metal ion binding;GO:0005515//protein binding;GO:0003677//DNA binding;GO:0004842//ubiquitin-protein ligase activity;GO:0003729//mRNA binding	GO:0000209//protein polyubiquitination;GO:0010468//regulation of gene expression;GO:0035264//multicellular organism growth;GO:0043029//T cell homeostasis;GO:0009791//post-embryonic development;GO:0048286//lung alveolus development;GO:0048536//spleen development;GO:0001782//B cell homeostasis;GO:0010608//posttranscriptional regulation of gene expression;GO:0042098//T cell proliferation;GO:0048535/…
chrJH375951.1	12225	13097	36	92	-1.35364	1.63864e-29	ENSGALG00000028073	1276313040278270	CDS_down	-	-	-	GO:0005515//protein binding	-
chr5	49485784	49486633	41	100	-1.2863	1.67492e-29	ENSGALG00000011368	4.9486e+21	CDS_down	ZNF839	-	-	GO:0046872//metal ion binding	-
chr7	23036842	23038678	65	136	-1.0651	1.95216e-29	ENSGALG00000011492	2.30381e+21	CDS_down	XRCC5	ko03450//Non-homologous end-joining	GO:0005634//nucleus;GO:0043564//Ku70:Ku80 complex;GO:0016020//membrane;GO:0000784//nuclear chromosome, telomeric region;GO:0070419//nonhomologous end joining complex;GO:0005737//cytoplasm	GO:0003677//DNA binding;GO:0003684//damaged DNA binding;GO:0004003//ATP-dependent DNA helicase activity;GO:0016817//hydrolase activity, acting on acid anhydrides;GO:0042162//telomeric DNA binding;GO:0005515//protein binding;GO:0031625//ubiquitin protein ligase binding;GO:0044212//transcription regulatory region DNA binding;GO:0008022//protein C-terminus binding;GO:0003691//double-stranded telomer…	GO:0000723//telomere maintenance;GO:0006303//double-strand break repair via nonhomologous end joining;GO:0006310//DNA recombination;GO:0032508//DNA duplex unwinding;GO:0045892//negative regulation of transcription, DNA-templated;GO:0008283//cell proliferation;GO:0060218//hematopoietic stem cell differentiation;GO:0006302//double-strand break repair;GO:0050769//positive regulation of neurogenesis
chr8	5017394	5018352	43	103	-1.26024	1.95542e-29	ENSGALG00000021047	5.01783e+19	CDS_down	KIFAP3	-	GO:0005871//kinesin complex;GO:0005813//centrosome;GO:0070062//extracellular vesicular exosome;GO:0015630//microtubule cytoskeleton;GO:0005876//spindle microtubule;GO:0000794//condensed nuclear chromosome;GO:0005783//endoplasmic reticulum;GO:0005794//Golgi apparatus;GO:0005930//axoneme;GO:0036064//ciliary basal body;GO:0032391//photoreceptor connecting cilium;GO:1990075//periciliary membrane comp…	GO:0019894//kinesin binding;GO:0005515//protein binding;GO:0005488//binding	GO:0008285//negative regulation of cell proliferation;GO:0043066//negative regulation of apoptotic process;GO:0007017//microtubule-based process;GO:0008104//protein localization;GO:0046587//positive regulation of calcium-dependent cell-cell adhesion
chr8	15491735	15492851	72	146	-1.0199	2.42252e-29	ENSGALG00000008780	1.5492e+21	CDS_down	CTBS	-	GO:0005615//extracellular space;GO:0070062//extracellular vesicular exosome	GO:0004553//hydrolase activity, hydrolyzing O-glycosyl compounds;GO:0004568//chitinase activity	GO:0005975//carbohydrate metabolic process;GO:0006032//chitin catabolic process
chr3	96732498	96733508	73	147	-1.00985	4.5181e-29	ENSGALG00000016449	96732979,96733036,58,58	CDS_down	PQLC3	-	-	-	-
chrZ	80661276	80662703	60	128	-1.09311	4.69032e-29	ENSGALG00000028127	8.06622e+21	CDS_down	-	-	GO:0005634//nucleus	GO:0003677//DNA binding;GO:0003700//sequence-specific DNA binding transcription factor activity	GO:0006355//regulation of transcription, DNA-templated
chr20	7037607	7038612	44	104	-1.24101	4.96215e-29	ENSGALG00000021232	7.03817e+19	CDS_down	TGM6	-	GO:0005737//cytoplasm	GO:0003810//protein-glutamine gamma-glutamyltransferase activity;GO:0046872//metal ion binding	GO:0018149//peptide cross-linking
chr7	21749683	21750820	71	144	-1.02018	5.04705e-29	ENSGALG00000011334	2.17506e+21	CDS_down	FAM134A	-	-	-	-
chr3	59528079	59529834	71	143	-1.01012	1.96694e-28	ENSGALG00000014843	5.95296e+21	CDS_down	TPD52L1	-	GO:0005737//cytoplasm;GO:0048471//perinuclear region of cytoplasm	GO:0042802//identical protein binding;GO:0005515//protein binding;GO:0042803//protein homodimerization activity;GO:0046982//protein heterodimerization activity	GO:0046330//positive regulation of JNK cascade;GO:0000086//G2/M transition of mitotic cell cycle;GO:2001235//positive regulation of apoptotic signaling pathway;GO:0043281//regulation of cysteine-type endopeptidase activity involved in apoptotic process;GO:0043406//positive regulation of MAP kinase activity
chr3	25529586	25531276	46	106	-1.20436	2.55529e-28	ENSGALG00000009990	2.55307e+21	CDS_down	SRBD1	-	-	GO:0003676//nucleic acid binding;GO:0003677//DNA binding;GO:0003723//RNA binding;GO:0016788//hydrolase activity, acting on ester bonds	GO:0006139//nucleobase-containing compound metabolic process;GO:0006281//DNA repair
chr15	7671580	7672658	61	128	-1.06926	5.28229e-28	ENSGALG00000005676	7671855,7671872,18,18	CDS_down	TTC28	-	GO:0005813//centrosome;GO:0030496//midbody	GO:0005515//protein binding	GO:0007346//regulation of mitotic cell cycle
chr20	8717642	8718690	59	125	-1.08314	6.07736e-28	ENSGALG00000005628	8.71812e+19	CDS_down	COL9A3	-	GO:0005594//collagen type IX trimer	-	GO:0008584//male gonad development;GO:0008585//female gonad development
chrZ	51119337	51120189	45	104	-1.20859	7.94218e-28	ENSGALG00000014642	5.11195e+21	CDS_down	CHDZ	-	GO:0005634//nucleus;GO:0005634//nucleus;GO:0005634//nucleus;GO:0005634//nucleus	GO:0003676//nucleic acid binding;GO:0003677//DNA binding;GO:0004386//helicase activity;GO:0005524//ATP binding;GO:0003676//nucleic acid binding;GO:0003677//DNA binding;GO:0004386//helicase activity;GO:0005524//ATP binding;GO:0003676//nucleic acid binding;GO:0003677//DNA binding;GO:0004386//helicase activity;GO:0005524//ATP binding;GO:0003676//nucleic acid binding;GO:0003677//DNA binding;GO:000438…	GO:0008152//metabolic process;GO:0008152//metabolic process;GO:0008152//metabolic process;GO:0008152//metabolic process
chrLGE64	318226	319377	66	135	-1.03242	8.1496e-28	ENSGALG00000024405	3.18221e+17	CDS_down	-	-	-	GO:0005515//protein binding	-
chr3	45547981	45548922	47	107	-1.18688	8.19267e-28	ENSGALG00000012256	4.55486e+21	CDS_down	UTRN	-	GO:0070062//extracellular vesicular exosome;GO:0005737//cytoplasm;GO:0005886//plasma membrane;GO:0005634//nucleus;GO:0031527//filopodium membrane;GO:0030175//filopodium;GO:0043234//protein complex;GO:0070938//contractile ring;GO:0045202//synapse;GO:0016010//dystrophin-associated glycoprotein complex;GO:0031594//neuromuscular junction	GO:0003779//actin binding;GO:0005509//calcium ion binding;GO:0008270//zinc ion binding;GO:0005515//protein binding;GO:0005488//binding;GO:0019901//protein kinase binding;GO:0017166//vinculin binding;GO:0005178//integrin binding	GO:0001954//positive regulation of cell-matrix adhesion
chr14	12526589	12527662	69	139	-1.01042	1.24517e-27	ENSGALG00000007762	1.25271e+21	CDS_down	CREBBP	ko05200//Pathways in cancer;ko05016//Huntington's disease;ko05164//Influenza A;ko04310//Wnt signaling pathway;ko04630//Jak-STAT signaling pathway;ko05152//Tuberculosis;ko04110//Cell cycle;ko04916//Melanogenesis;ko05215//Prostate cancer;ko04520//Adherens junction;ko05211//Renal cell carcinoma;ko04350//TGF-beta signaling pathway;ko04720//Long-term potentiation;ko04330//Notch signaling pathway	GO:0000123//histone acetyltransferase complex;GO:0005634//nucleus;GO:0005737//cytoplasm;GO:0000790//nuclear chromatin;GO:0016604//nuclear body;GO:0005667//transcription factor complex;GO:0000940//condensed chromosome outer kinetochore	GO:0003712//transcription cofactor activity;GO:0003713//transcription coactivator activity;GO:0004402//histone acetyltransferase activity;GO:0008270//zinc ion binding;GO:0005515//protein binding;GO:0001078//RNA polymerase II core promoter proximal region sequence-specific DNA binding transcription factor activity involved in negative regulation of transcription;GO:0001085//RNA polymerase II trans…	GO:0006355//regulation of transcription, DNA-templated;GO:0016573//histone acetylation;GO:0000122//negative regulation of transcription from RNA polymerase II promoter;GO:0018076//N-terminal peptidyl-lysine acetylation;GO:0045944//positive regulation of transcription from RNA polymerase II promoter;GO:0045893//positive regulation of transcription, DNA-templated;GO:0030718//germ-line stem cell mai…
chr8	6338751	6339831	54	117	-1.11548	1.37197e-27	ENSGALG00000004273	6338861,6338953,93,93	CDS_down	RALGPS1	-	GO:0005622//intracellular;GO:0005737//cytoplasm;GO:0005886//plasma membrane;GO:0016020//membrane	GO:0005085//guanyl-nucleotide exchange factor activity	GO:0007264//small GTPase mediated signal transduction;GO:0043547//positive regulation of GTPase activity
chr20	3986392	3986808	48	108	-1.16993	1.88229e-27	ENSGALG00000003537	3986585,3986680,96,96	CDS_down	SGK2	-	-	GO:0000166//nucleotide binding;GO:0004672//protein kinase activity;GO:0004674//protein serine/threonine kinase activity;GO:0005524//ATP binding;GO:0016301//kinase activity;GO:0016740//transferase activity;GO:0016772//transferase activity, transferring phosphorus-containing groups;GO:0004713//protein tyrosine kinase activity;GO:0015459//potassium channel regulator activity	GO:0006468//protein phosphorylation;GO:0016310//phosphorylation
chr4	76057284	76057992	53	115	-1.11757	2.79512e-27	ENSGALG00000014486	7.60576e+21	CDS_down	TAPT1	-	GO:0016020//membrane;GO:0016021//integral component of membrane	-	GO:0007275//multicellular organismal development;GO:0009791//post-embryonic development;GO:0048706//embryonic skeletal system development
chr4	59624453	59626318	43	100	-1.21759	3.07126e-27	ENSGALG00000012264	5.96253e+21	CDS_down	TRMT10A	-	GO:0070062//extracellular vesicular exosome	GO:0008168//methyltransferase activity	GO:0032259//methylation;GO:0010960//magnesium ion homeostasis
chr6	16451175	16452000	47	106	-1.17333	3.7657e-27	ENSGALG00000005637	1.64516e+21	CDS_down	GBF1	-	GO:0005794//Golgi apparatus;GO:0016020//membrane	GO:0005086//ARF guanyl-nucleotide exchange factor activity;GO:0005488//binding;GO:0005515//protein binding	GO:0032012//regulation of ARF protein signal transduction;GO:0043547//positive regulation of GTPase activity
chr6	18283099	18284093	66	134	-1.0217	4.22434e-27	ENSGALG00000006254	18283606,18283700,95,95	CDS_down	ERCC6	ko03420//Nucleotide excision repair	GO:0005730//nucleolus;GO:0005634//nucleus;GO:0005654//nucleoplasm;GO:0008023//transcription elongation factor complex	GO:0003676//nucleic acid binding;GO:0003677//DNA binding;GO:0004386//helicase activity;GO:0005524//ATP binding;GO:0005515//protein binding;GO:0003682//chromatin binding;GO:0047485//protein N-terminus binding;GO:0030296//protein tyrosine kinase activator activity;GO:0032403//protein complex binding;GO:0008094//DNA-dependent ATPase activity;GO:0008022//protein C-terminus binding	GO:0006200//ATP catabolic process;GO:0009411//response to UV;GO:0032786//positive regulation of DNA-templated transcription, elongation;GO:0032784//regulation of DNA-templated transcription, elongation;GO:0061098//positive regulation of protein tyrosine kinase activity;GO:0006284//base-excision repair;GO:0006979//response to oxidative stress;GO:0006283//transcription-coupled nucleotide-excision r…
chr5	45679560	45680537	50	110	-1.1375	8.16254e-27	ENSGALG00000011085	45679954,45680023,70,70	CDS_down	ATG2B	-	GO:0000407//pre-autophagosomal structure;GO:0019898//extrinsic component of membrane	-	GO:0000045//autophagic vacuole assembly;GO:0000422//mitochondrion degradation;GO:0006914//autophagy;GO:0006995//cellular response to nitrogen starvation;GO:0044804
chrZ	20263306	20265017	44	101	-1.19878	1.00329e-26	ENSGALG00000014751	2.02649e+21	CDS_down	ADAMTS6	-	GO:0005578//proteinaceous extracellular matrix;GO:0031012//extracellular matrix	GO:0004222//metalloendopeptidase activity;GO:0008233//peptidase activity;GO:0008237//metallopeptidase activity;GO:0008270//zinc ion binding	GO:0006508//proteolysis
chr5	14054874	14056515	63	129	-1.03395	1.076e-26	ENSGALG00000006697	1.40561e+21	CDS_down	TOLLIP	ko04620//Toll-like receptor signaling pathway	GO:0070062//extracellular vesicular exosome	GO:0005515//protein binding;GO:0019900//kinase binding;GO:0035325//Toll-like receptor binding	GO:0007165//signal transduction;GO:0016310//phosphorylation;GO:0030855//epithelial cell differentiation;GO:0036010//protein localization to endosome
chr5	11340655	11341603	55	117	-1.08901	1.62985e-26	ENSGALG00000006192	11340732,11340794,63,63	CDS_down	USH1C	-	GO:0005737//cytoplasm;GO:0045177//apical part of cell;GO:0005886//plasma membrane;GO:0045202//synapse;GO:0001750//photoreceptor outer segment;GO:0001917//photoreceptor inner segment;GO:0032420//stereocilium	GO:0005515//protein binding;GO:0030507//spectrin binding	GO:0045494//photoreceptor cell maintenance;GO:0007605//sensory perception of sound;GO:0000086//G2/M transition of mitotic cell cycle;GO:0050957//equilibrioception;GO:0050953//sensory perception of light stimulus;GO:0051017//actin filament bundle assembly;GO:0042472//inner ear morphogenesis;GO:0042491//auditory receptor cell differentiation;GO:0050885//neuromuscular process controlling balance;GO:…
chr6	32043927	32044874	55	117	-1.08901	1.62985e-26	ENSGALG00000013688	32044216,32044299,84,84	CDS_down	UROS	ko01100//Metabolic pathways;ko00860//Porphyrin and chlorophyll metabolism	GO:0005739//mitochondrion	GO:0004852//uroporphyrinogen-III synthase activity	GO:0033014//tetrapyrrole biosynthetic process;GO:0006780//uroporphyrinogen III biosynthetic process;GO:0006779//porphyrin-containing compound biosynthetic process
chr10	7373328	7374192	43	99	-1.20309	1.98418e-26	ENSGALG00000004361	7.37338e+19	CDS_down	PRTG	-	GO:0005615//extracellular space	GO:0005515//protein binding;GO:0005515//protein binding	-
chr4	39206773	39207722	46	103	-1.16294	4.64619e-26	ENSGALG00000010654	3.92072e+21	CDS_down	C4H4ORF41	-	-	-	-
chr3	47519498	47520442	50	109	-1.12433	4.81548e-26	ENSGALG00000012388	4.75197e+21	CDS_down	PCMT1	-	GO:0005737//cytoplasm	GO:0004719//protein-L-isoaspartate (D-aspartate) O-methyltransferase activity;GO:0008168//methyltransferase activity;GO:0016740//transferase activity;GO:0008276//protein methyltransferase activity	GO:0006464//cellular protein modification process;GO:0032259//methylation;GO:0006479//protein methylation;GO:0008152//metabolic process
chr6	20173496	20174352	53	113	-1.09226	6.87265e-26	ENSGALG00000006763	2.01736e+21	CDS_down	EXOC6	-	GO:0000145//exocyst	-	GO:0006904//vesicle docking involved in exocytosis;GO:0030218//erythrocyte differentiation
chr9	9727710	9729004	41	95	-1.2123	1.21743e-25	ENSGALG00000002850	9728913,9729019,107,92	CDS_down	RASA2	ko04010//MAPK signaling pathway	GO:0005622//intracellular;GO:0005737//cytoplasm;GO:0031235//intrinsic component of the cytoplasmic side of the plasma membrane	GO:0005096//GTPase activator activity;GO:0005099//Ras GTPase activator activity;GO:0005515//protein binding	GO:0007165//signal transduction;GO:0032320//positive regulation of Ras GTPase activity;GO:0035556//intracellular signal transduction;GO:0046580//negative regulation of Ras protein signal transduction;GO:0051056//regulation of small GTPase mediated signal transduction
chr3	54328242	54329215	56	117	-1.06301	1.80976e-25	ENSGALG00000013892	5.43287e+21	CDS_down	MAP3K5	ko04010//MAPK signaling pathway;ko04141//Protein processing in endoplasmic reticulum;ko04722//Neurotrophin signaling pathway;ko05014//Amyotrophic lateral sclerosis (ALS)	-	GO:0000166//nucleotide binding;GO:0004672//protein kinase activity;GO:0004674//protein serine/threonine kinase activity;GO:0005524//ATP binding;GO:0016301//kinase activity;GO:0016740//transferase activity;GO:0016772//transferase activity, transferring phosphorus-containing groups;GO:0004713//protein tyrosine kinase activity;GO:0005515//protein binding;GO:0000287//magnesium ion binding;GO:0042803/…	GO:0006468//protein phosphorylation;GO:0016310//phosphorylation;GO:0000165//MAPK cascade;GO:0043065//positive regulation of apoptotic process;GO:0000186//activation of MAPKK activity;GO:0006919//activation of cysteine-type endopeptidase activity involved in apoptotic process;GO:0070301//cellular response to hydrogen peroxide;GO:1901216//positive regulation of neuron death;GO:0008631//intrinsic ap…
chr3	24631050	24632271	50	108	-1.11103	2.0868e-25	ENSGALG00000009967	2.4632e+21	CDS_down	LRPPRC	-	GO:0005856//cytoskeleton;GO:0005739//mitochondrion;GO:0016020//membrane;GO:0005634//nucleus;GO:0005874//microtubule;GO:0048471//perinuclear region of cytoplasm;GO:0042645//mitochondrial nucleoid;GO:0000794//condensed nuclear chromosome;GO:0005737//cytoplasm;GO:0030529//ribonucleoprotein complex	GO:0005515//protein binding;GO:0048487//beta-tubulin binding;GO:0003723//RNA binding;GO:0003697//single-stranded DNA binding	GO:0000961//negative regulation of mitochondrial RNA catabolic process;GO:0070129//regulation of mitochondrial translation
chr8	23266741	23267729	52	111	-1.09398	2.12363e-25	ENSGALG00000010619	2.32672e+21	CDS_down	CC2D1B	-	-	GO:0005515//protein binding;GO:0000978//RNA polymerase II core promoter proximal region sequence-specific DNA binding;GO:0001078//RNA polymerase II core promoter proximal region sequence-specific DNA binding transcription factor activity involved in negative regulation of transcription	GO:0000122//negative regulation of transcription from RNA polymerase II promoter
chr4	21448548	21449264	54	113	-1.06529	7.74022e-25	ENSGALG00000020251	2.14476e+22	CDS_down	FNIP2	-	GO:0005737//cytoplasm;GO:0005886//plasma membrane;GO:0005634//nucleus;GO:0005815//microtubule organizing center	GO:0005515//protein binding	GO:0000122//negative regulation of transcription from RNA polymerase II promoter;GO:0006468//protein phosphorylation;GO:0033138//positive regulation of peptidyl-serine phosphorylation;GO:0001932//regulation of protein phosphorylation;GO:0008630//intrinsic apoptotic signaling pathway in response to DNA damage
chr3	3145327	3146960	46	101	-1.13465	1.25238e-24	ENSGALG00000008257	3.14552e+19	CDS_down	MERTK	-	GO:0016020//membrane;GO:0016021//integral component of membrane;GO:0005615//extracellular space;GO:0005737//cytoplasm;GO:0016028//rhabdomere	GO:0000166//nucleotide binding;GO:0004672//protein kinase activity;GO:0004713//protein tyrosine kinase activity;GO:0005524//ATP binding;GO:0016301//kinase activity;GO:0016740//transferase activity;GO:0016772//transferase activity, transferring phosphorus-containing groups;GO:0005515//protein binding	GO:0006468//protein phosphorylation;GO:0016310//phosphorylation;GO:0018108//peptidyl-tyrosine phosphorylation;GO:0050766//positive regulation of phagocytosis;GO:0006909//phagocytosis;GO:0007283//spermatogenesis;GO:0060041//retina development in camera-type eye;GO:0060068//vagina development;GO:0001779//natural killer cell differentiation;GO:0043491//protein kinase B signaling;GO:0043277//apoptoti…
chr4	50277633	50278692	46	101	-1.13465	1.25238e-24	ENSGALG00000011658	50277990,50278074,85,85	CDS_down	-	-	GO:0005615//extracellular space	-	GO:0006810//transport
chr3	66256157	66256965	39	90	-1.20645	2.23669e-24	ENSGALG00000015070	6.62566e+21	CDS_down	FIG4	-	GO:0010008//endosome membrane	GO:0042578//phosphoric ester hydrolase activity;GO:0005515//protein binding;GO:0042578//phosphoric ester hydrolase activity	GO:0007626//locomotory behavior;GO:0043473//pigmentation;GO:0046488//phosphatidylinositol metabolic process;GO:0048666//neuron development;GO:0031642//negative regulation of myelination;GO:0032288//myelin assembly;GO:0007033//vacuole organization;GO:0008152//metabolic process
chr6	10373580	10374344	43	96	-1.1587	2.63759e-24	ENSGALG00000004144	1.03739e+21	CDS_down	-	-	GO:0005634//nucleus	GO:0003676//nucleic acid binding;GO:0003723//RNA binding;GO:0004386//helicase activity;GO:0005524//ATP binding;GO:0016787//hydrolase activity;GO:0003677//DNA binding	GO:0008152//metabolic process
chr3	79822700	79823600	47	102	-1.11784	2.69356e-24	ENSGALG00000015897	79823204,79823295,92,92	CDS_down	IMPG1	-	GO:0005576//extracellular region	-	-
chr10	5529213	5530447	59	119	-1.01217	6.02725e-24	ENSGALG00000003970	5.52941e+19	CDS_down	TJP1	-	GO:0005923//tight junction;GO:0030054//cell junction;GO:0005737//cytoplasm;GO:0005886//plasma membrane;GO:0043296//apical junction complex;GO:0016323//basolateral plasma membrane;GO:0045177//apical part of cell;GO:0005634//nucleus;GO:0016020//membrane;GO:0005911//cell-cell junction;GO:0016324//apical plasma membrane;GO:0005913//cell-cell adherens junction;GO:0014704//intercalated disc;GO:0005912/…	GO:0005515//protein binding;GO:0019904//protein domain specific binding	GO:0007605//sensory perception of sound;GO:0001825//blastocyst formation
chr3	51135199	51136370	52	109	-1.06774	6.53497e-24	ENSGALG00000013732	5.11352e+21	CDS_down	SERAC1	-	GO:0005739//mitochondrion;GO:0005737//cytoplasm;GO:0005634//nucleus;GO:0031012//extracellular matrix	GO:0016788//hydrolase activity, acting on ester bonds;GO:0005488//binding	GO:0006505//GPI anchor metabolic process;GO:0006886//intracellular protein transport;GO:0030198//extracellular matrix organization
chr4	13881361	13882255	54	111	-1.03953	1.692e-23	ENSGALG00000008141	1.38819e+21	CDS_down	COL4A5	ko05200//Pathways in cancer;ko04510//Focal adhesion;ko05146//Amoebiasis;ko05222//Small cell lung cancer;ko04512//ECM-receptor interaction;ko04974//Protein digestion and absorption	GO:0005581//collagen trimer;GO:0005604//basement membrane;GO:0031594//neuromuscular junction;GO:0005605//basal lamina;GO:0005587//collagen type IV trimer	GO:0005201//extracellular matrix structural constituent	GO:0007528//neuromuscular junction development
chr8	17876910	17877883	52	108	-1.05445	2.66997e-23	ENSGALG00000008951	1.78771e+21	CDS_down	FAM73A	-	-	-	-
chr14	13717389	13718256	46	99	-1.10579	3.18019e-23	ENSGALG00000009341	13717857,13717942,86,86	CDS_down	-	-	GO:0005634//nucleus	GO:0003682//chromatin binding;GO:0003677//DNA binding	-
chr15	9685858	9686693	55	112	-1.026	4.26072e-23	ENSGALG00000007376	9.686e+19	CDS_down	CCDC60	-	-	-	-
chr3	109509263	109510496	55	112	-1.026	4.26072e-23	ENSGALG00000016718	1.0951e+23	CDS_down	GPR116	-	GO:0005886//plasma membrane;GO:0016020//membrane;GO:0016021//integral component of membrane;GO:0031410//cytoplasmic vesicle;GO:0009986//cell surface	GO:0004888//transmembrane signaling receptor activity;GO:0004930//G-protein coupled receptor activity;GO:0005515//protein binding	GO:0007166//cell surface receptor signaling pathway;GO:0007186//G-protein coupled receptor signaling pathway;GO:0007218//neuropeptide signaling pathway;GO:0042593//glucose homeostasis;GO:0006112//energy reserve metabolic process;GO:0045444//fat cell differentiation;GO:0019216//regulation of lipid metabolic process;GO:0043129//surfactant homeostasis
chrAADN03016058.1	1438	2296	38	87	-1.19502	4.45568e-23	ENSGALG00000027656	20052167163163	CDS_down	-	-	-	GO:0003676//nucleic acid binding;GO:0004386//helicase activity;GO:0005524//ATP binding;GO:0008270//zinc ion binding;GO:0016787//hydrolase activity	GO:0008152//metabolic process
chr5	52128819	52129776	53	109	-1.04026	4.64458e-23	ENSGALG00000028940	5.21292e+21	CDS_down	NUDT14	-	GO:0070062//extracellular vesicular exosome	GO:0016787//hydrolase activity;GO:0016818//hydrolase activity, acting on acid anhydrides, in phosphorus-containing anhydrides;GO:0046872//metal ion binding;GO:0005515//protein binding;GO:0047631//ADP-ribose diphosphatase activity;GO:0008768//UDP-sugar diphosphatase activity	GO:0008152//metabolic process
chr3	68458647	68459547	43	94	-1.12832	7.05643e-23	ENSGALG00000015415	6.84588e+21	CDS_down	HACE1	-	GO:0000139//Golgi membrane;GO:0005737//cytoplasm;GO:0005783//endoplasmic reticulum;GO:0005794//Golgi apparatus;GO:0016020//membrane;GO:0032580//Golgi cisterna membrane;GO:0000139//Golgi membrane;GO:0000139//Golgi membrane;GO:0005737//cytoplasm;GO:0005783//endoplasmic reticulum;GO:0005794//Golgi apparatus;GO:0016020//membrane;GO:0032580//Golgi cisterna membrane	GO:0004842//ubiquitin-protein ligase activity;GO:0016874//ligase activity;GO:0017137//Rab GTPase binding;GO:0005515//protein binding;GO:0017137//Rab GTPase binding;GO:0048365//Rac GTPase binding;GO:0004842//ubiquitin-protein ligase activity;GO:0016874//ligase activity;GO:0017137//Rab GTPase binding;GO:0005515//protein binding	GO:0007030//Golgi organization;GO:0007049//cell cycle;GO:0016567//protein ubiquitination;GO:0030334//regulation of cell migration;GO:0042787//protein ubiquitination involved in ubiquitin-dependent protein catabolic process;GO:0061025//membrane fusion;GO:0070936//protein K48-linked ubiquitination;GO:0016567//protein ubiquitination;GO:0061025//membrane fusion;GO:0030334//regulation of cell migratio…
chr4	51043301	51044462	43	94	-1.12832	7.05643e-23	ENSGALG00000011762	51043616,51043679,64,64	CDS_down	UBA6	ko04120//Ubiquitin mediated proteolysis	GO:0005829//cytosol;GO:0005737//cytoplasm	GO:0003824//catalytic activity;GO:0005524//ATP binding;GO:0008641//small protein activating enzyme activity;GO:0019780//FAT10 activating enzyme activity;GO:0019780//FAT10 activating enzyme activity;GO:0005515//protein binding	GO:0006464//cellular protein modification process;GO:0006511//ubiquitin-dependent protein catabolic process;GO:0032446//protein modification by small protein conjugation;GO:0006511//ubiquitin-dependent protein catabolic process
chr7	21400582	21401813	54	110	-1.02647	8.88304e-23	ENSGALG00000011153	2.14017e+21	CDS_down	LY75	-	GO:0009897//external side of plasma membrane	GO:0030246//carbohydrate binding	-
chr3	86468107	86469023	46	98	-1.09115	1.35554e-22	ENSGALG00000016289	8.64686e+22	CDS_down	DST	-	GO:0005856//cytoskeleton	GO:0003779//actin binding;GO:0005509//calcium ion binding;GO:0005515//protein binding	GO:0007050//cell cycle arrest
chr19	9053356	9054408	55	111	-1.01306	1.67076e-22	ENSGALG00000005660	9.05379e+19	CDS_down	NF1	ko04010//MAPK signaling pathway	GO:0005622//intracellular;GO:0016020//membrane;GO:0030425//dendrite;GO:0030424//axon;GO:0005737//cytoplasm	GO:0005096//GTPase activator activity;GO:0005099//Ras GTPase activator activity;GO:0005488//binding;GO:0031210//phosphatidylcholine binding;GO:0008429//phosphatidylethanolamine binding;GO:0005515//protein binding	GO:0007165//signal transduction;GO:0032320//positive regulation of Ras GTPase activity;GO:0051056//regulation of small GTPase mediated signal transduction;GO:0043535//regulation of blood vessel endothelial cell migration;GO:0045765//regulation of angiogenesis;GO:0030336//negative regulation of cell migration;GO:0050890//cognition;GO:0001937//negative regulation of endothelial cell proliferation;G…
chr8	4656518	4657425	48	101	-1.07325	1.77913e-22	ENSGALG00000003164	4.65671e+19	CDS_down	DNM3	ko04144//Endocytosis;ko04666//Fc gamma R-mediated phagocytosis;ko05100//Bacterial invasion of epithelial cells;ko04961//Endocrine and other factor-regulated calcium reabsorption	GO:0070062//extracellular vesicular exosome;GO:0005739//mitochondrion	GO:0000166//nucleotide binding;GO:0003924//GTPase activity;GO:0005525//GTP binding;GO:0005515//protein binding	GO:0006184//GTP catabolic process
chr3	33244407	33245026	53	108	-1.02697	1.85164e-22	ENSGALG00000010649	33244633,33244719,87,87	CDS_down	CNST	-	GO:0016020//membrane;GO:0005886//plasma membrane;GO:0005802//trans-Golgi network;GO:0030133//transport vesicle;GO:0043234//protein complex	GO:0005515//protein binding;GO:0019902//phosphatase binding;GO:0071253//connexin binding	GO:0010923//negative regulation of phosphatase activity;GO:0042998//positive regulation of Golgi to plasma membrane protein transport
chr10	3813937	3814747	45	96	-1.09311	4.1939e-22	ENSGALG00000003628	3814677,3814790,114,71	CDS_down	TLN2	ko04510//Focal adhesion	GO:0001726//ruffle;GO:0005856//cytoskeleton;GO:0005925//focal adhesion;GO:0015629//actin cytoskeleton;GO:0005916//fascia adherens;GO:0045202//synapse	GO:0003779//actin binding;GO:0005158//insulin receptor binding;GO:0005198//structural molecule activity;GO:0005200//structural constituent of cytoskeleton;GO:0051015//actin filament binding;GO:0005515//protein binding	GO:0007016//cytoskeletal anchoring at plasma membrane;GO:0007155//cell adhesion
chr9	10118777	10119596	54	109	-1.0133	4.58234e-22	ENSGALG00000002612	1.01192e+21	CDS_down	U2SURP	ko03040//Spliceosome	GO:0005634//nucleus	GO:0000166//nucleotide binding;GO:0003676//nucleic acid binding;GO:0003723//RNA binding;GO:0005515//protein binding	GO:0006396//RNA processing
chr19	6819501	6820131	52	106	-1.02748	5.65573e-22	ENSGALG00000004727	6.81971e+19	CDS_down	ULK2	ko04150//mTOR signaling pathway;ko04140//Regulation of autophagy	GO:0000407//pre-autophagosomal structure;GO:0005829//cytosol;GO:0016020//membrane;GO:0016020//membrane;GO:0034273//Atg1p signaling complex;GO:0034045//pre-autophagosomal structure membrane	GO:0000166//nucleotide binding;GO:0004672//protein kinase activity;GO:0004674//protein serine/threonine kinase activity;GO:0005524//ATP binding;GO:0016772//transferase activity, transferring phosphorus-containing groups;GO:0016773//phosphotransferase activity, alcohol group as acceptor;GO:0003824//catalytic activity;GO:0004713//protein tyrosine kinase activity;GO:0005515//protein binding	GO:0000045//autophagic vacuole assembly;GO:0006468//protein phosphorylation;GO:0010506//regulation of autophagy;GO:0046777//protein autophosphorylation;GO:0048675//axon extension;GO:0009103//lipopolysaccharide biosynthetic process;GO:0010506//regulation of autophagy;GO:0046777//protein autophosphorylation;GO:0048675//axon extension;GO:0042594//response to starvation;GO:0048671//negative regulatio…
chr14	12994506	12995184	50	103	-1.04264	6.15455e-22	ENSGALG00000002715	1.29947e+21	CDS_down	XPO6	-	GO:0005634//nucleus;GO:0005730//nucleolus;GO:0005737//cytoplasm;GO:0005886//plasma membrane	GO:0008536//Ran GTPase binding;GO:0005488//binding;GO:0005515//protein binding;GO:0008565//protein transporter activity	GO:0006810//transport;GO:0006886//intracellular protein transport;GO:0006611//protein export from nucleus
chrZ	37571948	37572884	48	100	-1.05889	7.31813e-22	ENSGALG00000015176	3.75723e+21	CDS_down	GNA14	ko04020//Calcium signaling pathway;ko05142//Chagas disease (American trypanosomiasis);ko05146//Amoebiasis	GO:0005834//heterotrimeric G-protein complex;GO:0070062//extracellular vesicular exosome	GO:0000166//nucleotide binding;GO:0001664//G-protein coupled receptor binding;GO:0003924//GTPase activity;GO:0004871//signal transducer activity;GO:0005525//GTP binding;GO:0019001//guanyl nucleotide binding;GO:0031683//G-protein beta/gamma-subunit complex binding	GO:0006184//GTP catabolic process;GO:0007165//signal transduction;GO:0007186//G-protein coupled receptor signaling pathway;GO:0007188//adenylate cyclase-modulating G-protein coupled receptor signaling pathway;GO:0060158//phospholipase C-activating dopamine receptor signaling pathway
chrZ	27450683	27451693	53	107	-1.01355	9.57551e-22	ENSGALG00000015027	2.74508e+21	CDS_down	JAK2	ko05164//Influenza A;ko04630//Jak-STAT signaling pathway;ko04062//Chemokine signaling pathway;ko05152//Tuberculosis;ko05145//Toxoplasmosis;ko05162//Measles;ko04725//Cholinergic synapse;ko04920//Adipocytokine signaling pathway;ko05140//Leishmaniasis	GO:0005856//cytoskeleton;GO:0016020//membrane;GO:0005856//cytoskeleton;GO:0016020//membrane;GO:0005737//cytoplasm;GO:0005634//nucleus;GO:0045121//membrane raft;GO:0005901//caveola	GO:0000166//nucleotide binding;GO:0004672//protein kinase activity;GO:0004713//protein tyrosine kinase activity;GO:0004715//non-membrane spanning protein tyrosine kinase activity;GO:0005524//ATP binding;GO:0016301//kinase activity;GO:0016740//transferase activity;GO:0016772//transferase activity, transferring phosphorus-containing groups;GO:0042393//histone binding;GO:0000166//nucleotide binding;…	GO:0006468//protein phosphorylation;GO:0016310//phosphorylation;GO:0018108//peptidyl-tyrosine phosphorylation;GO:0035556//intracellular signal transduction;GO:0006468//protein phosphorylation;GO:0016310//phosphorylation;GO:0035556//intracellular signal transduction;GO:0033209//tumor necrosis factor-mediated signaling pathway;GO:0034612//response to tumor necrosis factor;GO:0070671//response to in…
chrZ	80472824	80473667	47	98	-1.06012	1.51679e-21	ENSGALG00000022133	80472972,80473038,67,67	CDS_down	-	-	GO:0005634//nucleus	GO:0003677//DNA binding;GO:0003700//sequence-specific DNA binding transcription factor activity	GO:0006355//regulation of transcription, DNA-templated
chr4	80077093	80077849	43	92	-1.0973	1.7704e-21	ENSGALG00000015554	8.00773e+21	CDS_down	-	-	GO:0016020//membrane;GO:0016021//integral component of membrane	-	-
chr6	15663850	15664609	52	105	-1.01381	2.91466e-21	ENSGALG00000005232	15663814,15663919,106,70	CDS_down	USP54	-	-	GO:0036459//ubiquitinyl hydrolase activity;GO:0005515//protein binding	GO:0006511//ubiquitin-dependent protein catabolic process
chrZ	7466448	7467200	47	97	-1.04532	8.16502e-21	ENSGALG00000005806	7.4665e+19	CDS_down	KIF24	-	GO:0005871//kinesin complex;GO:0005874//microtubule;GO:0005814//centriole;GO:0043234//protein complex;GO:0005871//kinesin complex;GO:0005874//microtubule	GO:0000166//nucleotide binding;GO:0003777//microtubule motor activity;GO:0005524//ATP binding;GO:0008017//microtubule binding;GO:0005515//protein binding;GO:0000166//nucleotide binding;GO:0003777//microtubule motor activity;GO:0005524//ATP binding;GO:0008017//microtubule binding;GO:0005515//protein binding	GO:0007018//microtubule-based movement;GO:0008152//metabolic process;GO:0042384//cilium assembly;GO:0007019//microtubule depolymerization;GO:0007018//microtubule-based movement;GO:0008152//metabolic process
chr4	88599184	88600091	50	101	-1.01436	1.27395e-20	ENSGALG00000016026	8.85993e+21	CDS_down	C20orf194	-	-	-	-
chr3	75137624	75138464	48	98	-1.02975	1.56825e-20	ENSGALG00000015776	7.51379e+21	CDS_down	GABRR2	ko04080//Neuroactive ligand-receptor interaction	GO:0005886//plasma membrane;GO:0016020//membrane;GO:0016021//integral component of membrane;GO:0030054//cell junction;GO:0045202//synapse	GO:0004890//GABA-A receptor activity;GO:0005230//extracellular ligand-gated ion channel activity	GO:0006810//transport;GO:0006811//ion transport;GO:0034220//ion transmembrane transport;GO:0007601//visual perception;GO:0007214//gamma-aminobutyric acid signaling pathway
chr20	7132386	7133325	46	95	-1.04629	1.69771e-20	ENSGALG00000004873	7.13268e+19	CDS_down	PHACTR3	-	GO:0005634//nucleus	GO:0003779//actin binding	-
chr7	19506001	19507326	46	95	-1.04629	1.69771e-20	ENSGALG00000011052	19505935,19506069,135,69	CDS_down	SLC38A11	-	GO:0016020//membrane;GO:0016021//integral component of membrane	-	GO:0003333//amino acid transmembrane transport
chr9	9461209	9462130	45	93	-1.04731	5.21423e-20	ENSGALG00000002958	9.46161e+19	CDS_down	DNER	-	GO:0005886//plasma membrane;GO:0005769//early endosome;GO:0030425//dendrite;GO:0043025//neuronal cell body	GO:0005509//calcium ion binding;GO:0005515//protein binding;GO:0005112//Notch binding	GO:0007417//central nervous system development;GO:0010001//glial cell differentiation;GO:0048741//skeletal muscle fiber development;GO:0007220//Notch receptor processing
chr8	17820313	17821147	47	95	-1.01527	1.69771e-19	ENSGALG00000008945	1.78206e+21	CDS_down	NEXN	-	GO:0030018//Z disc;GO:0005925//focal adhesion	GO:0004683//calmodulin-dependent protein kinase activity;GO:0051015//actin filament binding;GO:0005515//protein binding;GO:0051015//actin filament binding;GO:0008307//structural constituent of muscle	GO:0006468//protein phosphorylation;GO:0030334//regulation of cell migration;GO:0048739//cardiac muscle fiber development;GO:0051493//regulation of cytoskeleton organization;GO:0051493//regulation of cytoskeleton organization;GO:0030334//regulation of cell migration
chrZ	7262336	7262964	122	0	#DIV/0!	1.51902e-210	ENSGALG00000027479	7.26086e+20	downstream2k_up	IFNA	ko04060//Cytokine-cytokine receptor interaction;ko05164//Influenza A;ko04630//Jak-STAT signaling pathway;ko05152//Tuberculosis;ko05160//Hepatitis C;ko05162//Measles;ko04620//Toll-like receptor signaling pathway;ko04650//Natural killer cell mediated cytotoxicity;ko04622//RIG-I-like receptor signaling pathway;ko04623//Cytosolic DNA-sensing pathway;ko05320//Autoimmune thyroid disease;ko04140//Regula…	GO:0005576//extracellular region;GO:0005615//extracellular space;GO:0005615//extracellular space;GO:0005576//extracellular region;GO:0005615//extracellular space;GO:0005615//extracellular space;GO:0005576//extracellular region;GO:0005615//extracellular space;GO:0005615//extracellular space;GO:0005576//extracellular region;GO:0005615//extracellular space;GO:0005615//extracellular space;GO:0005576/…	GO:0005125//cytokine activity;GO:0005125//cytokine activity;GO:0005126//cytokine receptor binding;GO:0005132//type I interferon receptor binding;GO:0005125//cytokine activity;GO:0005125//cytokine activity;GO:0005126//cytokine receptor binding;GO:0005132//type I interferon receptor binding;GO:0005125//cytokine activity;GO:0005125//cytokine activity;GO:0005126//cytokine receptor binding;GO:0005132/…	GO:0006952//defense response;GO:0051607//defense response to virus;GO:0002250//adaptive immune response;GO:0002286//T cell activation involved in immune response;GO:0002323//natural killer cell activation involved in immune response;GO:0006959//humoral immune response;GO:0019221//cytokine-mediated signaling pathway;GO:0030183//B cell differentiation;GO:0033141//positive regulation of peptidyl-ser…
chrZ	65156568	65156878	200	22	3.18442	2.27683e-181	ENSGALG00000028441	6.51556e+22	downstream2k_up	-	-	-	-	-
chrZ	7251826	7252634	142	6	4.56478	1.39297e-157	ENSGALG00000029013	7.25083e+20	downstream2k_up	-	-	GO:0005576//extracellular region;GO:0005615//extracellular space	GO:0005125//cytokine activity;GO:0005126//cytokine receptor binding	GO:0006952//defense response;GO:0051607//defense response to virus
chrAADN03017457.1	1	655	123	10	3.62059	4.06505e-122	ENSGALG00000028674	1,20,20,20	downstream2k_up	-	-	-	GO:0005515//protein binding	-
chr16	238716	239323	126	21	2.58496	5.09989e-97	ENSGALG00000024420	2.38314e+18	downstream2k_up	-	-	-	-	-
chrAADN03025979.1	2536	6125	172	61	1.49553	8.85512e-71	ENSGALG00000022210	4287628620001830	downstream2k_up	-	-	-	-	-
chrJH375961.1	3	1001	116	28	2.05063	1.15006e-70	ENSGALG00000027939	1,56,56,54	downstream2k_up	-	-	-	GO:0005515//protein binding;GO:0005515//protein binding;GO:0005515//protein binding	-
chrAADN03021853.1	1	1205	205	83	1.30444	6.99923e-70	ENSGALG00000011146	1,20,20,20	downstream2k_up	RECQL4	-	-	GO:0003676//nucleic acid binding;GO:0004386//helicase activity;GO:0005524//ATP binding	GO:0008152//metabolic process;GO:0008284//positive regulation of cell proliferation;GO:0001501//skeletal system development;GO:0043473//pigmentation;GO:0048705//skeletal system morphogenesis;GO:0045875//negative regulation of sister chromatid cohesion
chrJH376129.1	2840	3753	255	121	1.07549	1.05397e-65	ENSGALG00000027317	222742262000914	downstream2k_up	-	-	-	-	-
chrAADN03019000.1	2659	5321	238	112	1.08746	1.60412e-62	ENSGALG00000027266	3465546420001850	downstream2k_up	-	-	-	GO:0005515//protein binding	-
chrZ	71661777	71662653	101	26	1.95777	1.40223e-58	ENSGALG00000002250	7.16611e+22	downstream2k_up	DTWD2	-	-	-	-
chrAADN03014174.1	334	1834	203	98	1.05063	6.03377e-51	ENSGALG00000028613	93929382000896	downstream2k_up	-	-	-	GO:0005515//protein binding	-
chrZ	18879833	18881238	118	41	1.52509	3.29414e-50	ENSGALG00000027564	1.88796e+23	downstream2k_up	NDUFAF2	-	GO:0005739//mitochondrion	GO:0008137//NADH dehydrogenase (ubiquinone) activity	GO:0072593//reactive oxygen species metabolic process;GO:0045333//cellular respiration;GO:0022904//respiratory electron transport chain;GO:0061179//negative regulation of insulin secretion involved in cellular response to glucose stimulus
chr27	380246	381940	119	46	1.37126	3.2975e-44	ENSGALG00000026169	3.80504e+19	downstream2k_up	-	-	-	GO:0005515//protein binding	-
chr14	6927170	6927996	105	37	1.50479	4.1285e-44	ENSGALG00000006140	6.92575e+20	downstream2k_up	GGA2	ko04142//Lysosome	GO:0005622//intracellular;GO:0030131//clathrin adaptor complex;GO:0005794//Golgi apparatus;GO:0005802//trans-Golgi network;GO:0030136//clathrin-coated vesicle	GO:0005515//protein binding;GO:0030306//ADP-ribosylation factor binding	GO:0006886//intracellular protein transport;GO:0016192//vesicle-mediated transport
chr15	4931526	4932416	138	59	1.22588	1.30308e-43	ENSGALG00000023682	4.931e+20	downstream2k_up	GTF2H3	ko03420//Nucleotide excision repair;ko03022//Basal transcription factors	GO:0000439//core TFIIH complex;GO:0005675//holo TFIIH complex	GO:0047485//protein N-terminus binding;GO:0008094//DNA-dependent ATPase activity;GO:0004672//protein kinase activity;GO:0008353//RNA polymerase II carboxy-terminal domain kinase activity	GO:0006289//nucleotide-excision repair;GO:0006355//regulation of transcription, DNA-templated;GO:0006366//transcription from RNA polymerase II promoter;GO:0006200//ATP catabolic process;GO:0006468//protein phosphorylation
chrJH376134.1	162	1186	161	79	1.02714	1.73516e-39	ENSGALG00000027488	1135313531025	downstream2k_up	-	-	-	-	-
chrZ	21768274	21769772	125	56	1.15843	8.82082e-37	ENSGALG00000014787	2.17685e+23	downstream2k_up	SLC30A5	-	GO:0005794//Golgi apparatus;GO:0016020//membrane;GO:0016021//integral component of membrane;GO:0005730//nucleolus;GO:0005634//nucleus;GO:0030141//secretory granule;GO:0016324//apical plasma membrane	GO:0008324//cation transmembrane transporter activity;GO:0005385//zinc ion transmembrane transporter activity	GO:0006810//transport;GO:0006811//ion transport;GO:0006812//cation transport;GO:0006829//zinc ion transport;GO:0055085//transmembrane transport;GO:0010043//response to zinc ion;GO:0006824//cobalt ion transport;GO:0006882//cellular zinc ion homeostasis;GO:0071577//zinc ion transmembrane transport
chrJH375199.1	12896	13908	92	34	1.4361	1.44956e-36	ENSGALG00000026145	1.19171e+17	downstream2k_up	-	-	GO:0016020//membrane	-	GO:0006955//immune response;GO:0019882//antigen processing and presentation
chrZ	56014701	56015620	125	57	1.13289	1.49819e-35	ENSGALG00000014691	5.60142e+22	downstream2k_up	PHAX	ko03013//RNA transport	GO:0005730//nucleolus;GO:0043231//intracellular membrane-bounded organelle;GO:0005634//nucleus;GO:0005737//cytoplasm	-	GO:0006408//snRNA export from nucleus
chrAADN03013081.1	1300	2199	106	44	1.26849	1.61521e-35	ENSGALG00000002939	46324622000900	downstream2k_up	-	-	GO:0016020//membrane	GO:0005044//scavenger receptor activity	GO:0006898//receptor-mediated endocytosis
chrJH376338.1	10222	11299	133	64	1.05528	2.9176e-34	ENSGALG00000028669	9.93312e+16	downstream2k_up	-	-	-	GO:0005515//protein binding	-
chr8	10772925	10773784	97	41	1.24236	1.153e-31	ENSGALG00000005248	1.07722e+22	downstream2k_up	CDC14A	ko04110//Cell cycle	GO:0005813//centrosome;GO:0005737//cytoplasm;GO:0005634//nucleus	GO:0004725//protein tyrosine phosphatase activity;GO:0008138//protein tyrosine/serine/threonine phosphatase activity;GO:0016787//hydrolase activity;GO:0016791//phosphatase activity;GO:0005515//protein binding	GO:0006470//protein dephosphorylation;GO:0016311//dephosphorylation;GO:0035335//peptidyl-tyrosine dephosphorylation
chr9	13514968	13515830	98	45	1.12286	7.34152e-28	ENSGALG00000007303	1.35135e+22	downstream2k_up	LEPREL1	-	GO:0005794//Golgi apparatus;GO:0005783//endoplasmic reticulum;GO:0005604//basement membrane	GO:0005506//iron ion binding;GO:0016491//oxidoreductase activity;GO:0016705//oxidoreductase activity, acting on paired donors, with incorporation or reduction of molecular oxygen;GO:0016706//oxidoreductase activity, acting on paired donors, with incorporation or reduction of molecular oxygen, 2-oxoglutarate as one donor, and incorporation of one atom each of oxygen into both donors;GO:0031418//L-…	GO:0055114//oxidation-reduction process;GO:0008285//negative regulation of cell proliferation;GO:0019511//peptidyl-proline hydroxylation;GO:0032963//collagen metabolic process
chrJH376216.1	86	1312	89	39	1.19033	1.79501e-27	ENSGALG00000029078	64426432000669	downstream2k_up	-	-	-	GO:0005515//protein binding	-
chr3	32855541	32856435	107	53	1.01355	3.59621e-26	ENSGALG00000010603	3.2856e+22	downstream2k_up	CEBPZ	-	-	GO:0005488//binding;GO:0000978//RNA polymerase II core promoter proximal region sequence-specific DNA binding;GO:0001077//RNA polymerase II core promoter proximal region sequence-specific DNA binding transcription factor activity involved in positive regulation of transcription	GO:0045944//positive regulation of transcription from RNA polymerase II promoter
chrJH375227.1	1676	2726	1	861	-9.74987	0	ENSGALG00000022674	1037303620001050	downstream2k_down	HINTW	-	GO:0005634//nucleus	GO:0046983//protein dimerization activity	GO:0046660//female sex differentiation
chrJH375228.1	27	1588	0	211	#NUM!	0	ENSGALG00000022685	1179217921562	downstream2k_down	-	-	-	-	-
chr16	400776	401773	12	110	-3.1964	4.77681e-95	ENSGALG00000001131	4.00631e+18	downstream2k_down	-	-	-	GO:0030246//carbohydrate binding	-
chrZ	56002660	56004199	38	163	-2.1008	3.45711e-92	ENSGALG00000028954	5.60027e+23	downstream2k_down	-	-	-	GO:0008270//zinc ion binding;GO:0046872//metal ion binding;GO:0005515//protein binding;GO:0008270//zinc ion binding;GO:0046872//metal ion binding;GO:0005515//protein binding	-
chrAADN03023867.1	882	2516	34	146	-2.10236	8.28215e-83	ENSGALG00000026943	431243020001549	downstream2k_down	-	-	-	-	GO:0016032//viral process
chrJH375196.1	3566	5621	73	203	-1.47551	1.50398e-71	ENSGALG00000029093	3803580220001810	downstream2k_down	-	ko04144//Endocytosis;ko04145//Phagosome;ko04514//Cell adhesion molecules (CAMs);ko04650//Natural killer cell mediated cytotoxicity;ko05416//Viral myocarditis;ko05320//Autoimmune thyroid disease;ko04612//Antigen processing and presentation;ko04940//Type I diabetes mellitus;ko05330//Allograft rejection;ko05332//Graft-versus-host disease	GO:0016020//membrane;GO:0016021//integral component of membrane;GO:0042612//MHC class I protein complex;GO:0042613//MHC class II protein complex;GO:0016020//membrane;GO:0016021//integral component of membrane;GO:0042612//MHC class I protein complex;GO:0042613//MHC class II protein complex	GO:0042605//peptide antigen binding;GO:0005515//protein binding;GO:0042605//peptide antigen binding;GO:0005515//protein binding	GO:0001916//positive regulation of T cell mediated cytotoxicity;GO:0002474//antigen processing and presentation of peptide antigen via MHC class I;GO:0006955//immune response;GO:0019882//antigen processing and presentation;GO:0001916//positive regulation of T cell mediated cytotoxicity;GO:0002474//antigen processing and presentation of peptide antigen via MHC class I;GO:0006955//immune response;G…
chrJH375207.1	18909	20069	37	133	-1.84583	1.70425e-64	ENSGALG00000027445	1.75952e+16	downstream2k_down	-	-	GO:0016020//membrane;GO:0016021//integral component of membrane;GO:0042612//MHC class I protein complex	GO:0042605//peptide antigen binding;GO:0005515//protein binding	GO:0001916//positive regulation of T cell mediated cytotoxicity;GO:0002474//antigen processing and presentation of peptide antigen via MHC class I;GO:0006955//immune response;GO:0019882//antigen processing and presentation
chr15	8821022	8821971	28	115	-2.03814	3.0807e-63	ENSGALG00000006743	8.82095e+20	downstream2k_down	YWHAH	-	GO:0070062//extracellular vesicular exosome;GO:0005886//plasma membrane;GO:0005737//cytoplasm	GO:0019904//protein domain specific binding;GO:0005515//protein binding;GO:0019899//enzyme binding;GO:0044325//ion channel binding;GO:0046982//protein heterodimerization activity;GO:0017080//sodium channel regulator activity;GO:0035259//glucocorticoid receptor binding;GO:0003779//actin binding	GO:0045893//positive regulation of transcription, DNA-templated;GO:2000649//regulation of sodium ion transmembrane transporter activity;GO:0021762//substantia nigra development;GO:0006713//glucocorticoid catabolic process;GO:0002028//regulation of sodium ion transport;GO:0042921//glucocorticoid receptor signaling pathway;GO:0086010//membrane depolarization during action potential;GO:0006886//intr…
chrJH376386.1	2246	3038	35	117	-1.74108	1.13794e-52	ENSGALG00000028646	116131602000793	downstream2k_down	-	-	-	GO:0005515//protein binding	-
chrJH376272.1	2656	5392	88	201	-1.19162	2.25959e-51	ENSGALG00000026855	4297629620001090	downstream2k_down	-	-	-	-	-
chrJH375954.1	3777	6404	84	186	-1.14684	1.13191e-44	ENSGALG00000018703	4101610020002000	downstream2k_down	-	-	-	-	-
chr3	109742579	109743440	52	134	-1.36565	1.3976e-42	ENSGALG00000016725	1.09742e+24	downstream2k_down	OPN5	-	GO:0016020//membrane;GO:0016021//integral component of membrane	GO:0004871//signal transducer activity;GO:0004930//G-protein coupled receptor activity;GO:0009881//photoreceptor activity;GO:0005502//11-cis retinal binding	GO:0007165//signal transduction;GO:0007186//G-protein coupled receptor signaling pathway;GO:0007601//visual perception;GO:0018298//protein-chromophore linkage;GO:0050896//response to stimulus
chrAADN03015454.1	5775	9546	77	169	-1.13409	5.61139e-40	ENSGALG00000026312	8.3071e+16	downstream2k_down	-	-	-	GO:0005515//protein binding	-
chr17	5472726	5473651	54	132	-1.28951	1.34183e-38	ENSGALG00000004490	5.47222e+20	downstream2k_down	FAM73B	-	-	-	GO:0060348//bone development
chr4	39502480	39503599	59	138	-1.22588	3.48986e-37	ENSGALG00000010706	3.95017e+23	downstream2k_down	ODZ3	-	GO:0016021//integral component of membrane;GO:0016021//integral component of membrane;GO:0016021//integral component of membrane	GO:0005515//protein binding;GO:0005515//protein binding;GO:0005515//protein binding	GO:0007165//signal transduction;GO:0097264//self proteolysis;GO:0007165//signal transduction;GO:0097264//self proteolysis;GO:0007165//signal transduction;GO:0097264//self proteolysis;GO:0048593//camera-type eye morphogenesis
chr10	320062	321140	37	101	-1.44876	2.00671e-35	ENSGALG00000013975	3.19595e+19	downstream2k_down	-	-	GO:0005886//plasma membrane;GO:0016020//membrane;GO:0016021//integral component of membrane	GO:0004871//signal transducer activity;GO:0004930//G-protein coupled receptor activity;GO:0004984//olfactory receptor activity	GO:0007165//signal transduction;GO:0007186//G-protein coupled receptor signaling pathway;GO:0007608//sensory perception of smell;GO:0050896//response to stimulus;GO:0050911//detection of chemical stimulus involved in sensory perception of smell
chr5	49536107	49536963	50	120	-1.26303	3.41513e-34	ENSGALG00000011373	4.95365e+22	downstream2k_down	TECPR2	-	-	GO:0005515//protein binding	-
chr4	45685941	45686963	52	123	-1.24207	4.50353e-34	ENSGALG00000011130	4.56855e+23	downstream2k_down	COPS4	-	GO:0030054//cell junction;GO:0070062//extracellular vesicular exosome;GO:0005634//nucleus;GO:0008021//synaptic vesicle;GO:0008180//COP9 signalosome	GO:0005515//protein binding	GO:0010388//cullin deneddylation;GO:0000338//protein deneddylation
chr5	8219129	8220232	67	145	-1.11382	9.92051e-34	ENSGALG00000005618	8.21779e+20	downstream2k_down	CTR9	-	GO:0016593//Cdc73/Paf1 complex;GO:0005634//nucleus;GO:0035327//transcriptionally active chromatin	GO:0005515//protein binding;GO:0042169//SH2 domain binding	GO:0045944//positive regulation of transcription from RNA polymerase II promoter;GO:0032968//positive regulation of transcription elongation from RNA polymerase II promoter;GO:2001162//positive regulation of histone H3-K79 methylation;GO:0033523//histone H2B ubiquitination;GO:0010390//histone monoubiquitination;GO:0019827//stem cell maintenance;GO:0080182//histone H3-K4 trimethylation;GO:0051571/…
chr3	62441052	62442050	69	148	-1.10093	1.01901e-33	ENSGALG00000014892	6.24412e+22	downstream2k_down	-	-	GO:0016020//membrane	-	GO:0016192//vesicle-mediated transport
chr8	19077517	19078869	67	144	-1.10384	5.68972e-33	ENSGALG00000010074	1.90772e+23	downstream2k_down	KDM4A	-	GO:0005634//nucleus;GO:0005730//nucleolus;GO:0005737//cytoplasm	GO:0008270//zinc ion binding;GO:0046872//metal ion binding;GO:0005515//protein binding;GO:0031625//ubiquitin protein ligase binding;GO:0035064//methylated histone binding;GO:0051864//histone demethylase activity (H3-K36 specific)	GO:0045892//negative regulation of transcription, DNA-templated;GO:0070544//histone H3-K36 demethylation;GO:0016577//histone demethylation;GO:0014898//cardiac muscle hypertrophy in response to stress
chr3	91472329	91473269	47	112	-1.25277	1.30619e-31	ENSGALG00000016362	9.14714e+22	downstream2k_down	SH3YL1	-	GO:0032587//ruffle membrane	GO:0005515//protein binding;GO:0035091//phosphatidylinositol binding;GO:0019902//phosphatase binding	GO:1900027//regulation of ruffle assembly;GO:0006661//phosphatidylinositol biosynthetic process
chr3	7789123	7790002	53	120	-1.17897	8.64522e-31	ENSGALG00000020084	7.78781e+20	downstream2k_down	CAPN13	-	GO:0005622//intracellular;GO:0005737//cytoplasm	GO:0004198//calcium-dependent cysteine-type endopeptidase activity;GO:0005509//calcium ion binding;GO:0008233//peptidase activity;GO:0008234//cysteine-type peptidase activity;GO:0016787//hydrolase activity	GO:0006508//proteolysis
chr10	9042918	9043716	45	107	-1.24961	5.25765e-30	ENSGALG00000021295	9.04214e+20	downstream2k_down	-	-	-	-	-
chr4	78872	79538	45	105	-1.22239	1.67593e-28	ENSGALG00000004713	7.88248e+16	downstream2k_down	LAS1L	-	GO:0016020//membrane;GO:0005737//cytoplasm;GO:0005634//nucleus;GO:0005815//microtubule organizing center;GO:0071339//MLL1 complex	-	-
chrZ	24060697	24061647	49	110	-1.16665	9.39194e-28	ENSGALG00000014942	2.40595e+22	downstream2k_down	NSA2	-	-	-	-
chr4	57630618	57631687	67	136	-1.02137	1.38823e-27	ENSGALG00000012155	5.76298e+23	downstream2k_down	EGF	ko05200//Pathways in cancer;ko04010//MAPK signaling pathway;ko04810//Regulation of actin cytoskeleton;ko04510//Focal adhesion;ko04144//Endocytosis;ko04060//Cytokine-cytokine receptor interaction;ko05160//Hepatitis C;ko05215//Prostate cancer;ko04012//ErbB signaling pathway;ko04540//Gap junction;ko05218//Melanoma;ko05212//Pancreatic cancer;ko05214//Glioma;ko05213//Endometrial cancer;ko05223//Non-sm…	GO:0016020//membrane;GO:0016021//integral component of membrane;GO:0005615//extracellular space;GO:0070062//extracellular vesicular exosome;GO:0005765//lysosomal membrane;GO:0005886//plasma membrane	GO:0005509//calcium ion binding;GO:0005515//protein binding;GO:0008083//growth factor activity;GO:0005154//epidermal growth factor receptor binding	GO:0045893//positive regulation of transcription, DNA-templated;GO:0008284//positive regulation of cell proliferation;GO:0001525//angiogenesis;GO:0090279//regulation of calcium ion import;GO:0051048//negative regulation of secretion;GO:1900127//positive regulation of hyaluronan biosynthetic process;GO:0035413//positive regulation of catenin import into nucleus;GO:0070371//ERK1 and ERK2 cascade;GO…
chr5	43381561	43382484	49	109	-1.15347	5.70476e-27	ENSGALG00000010698	4.33819e+22	downstream2k_down	RPS6KA5	ko04010//MAPK signaling pathway;ko04722//Neurotrophin signaling pathway;ko05219//Bladder cancer	GO:0016020//membrane;GO:0005737//cytoplasm;GO:0005634//nucleus	GO:0000166//nucleotide binding;GO:0000287//magnesium ion binding;GO:0004672//protein kinase activity;GO:0004674//protein serine/threonine kinase activity;GO:0005524//ATP binding;GO:0016301//kinase activity;GO:0016740//transferase activity;GO:0016772//transferase activity, transferring phosphorus-containing groups;GO:0016773//phosphotransferase activity, alcohol group as acceptor;GO:0004713//prote…	GO:0006468//protein phosphorylation;GO:0016310//phosphorylation;GO:0035556//intracellular signal transduction;GO:0009103//lipopolysaccharide biosynthetic process;GO:0006355//regulation of transcription, DNA-templated;GO:0045944//positive regulation of transcription from RNA polymerase II promoter;GO:0045892//negative regulation of transcription, DNA-templated;GO:0043988//histone H3-S28 phosphoryl…
chr8	3484533	3485674	57	120	-1.074	1.42762e-26	ENSGALG00000002504	3.48426e+21	downstream2k_down	TROVE2	-	GO:0030529//ribonucleoprotein complex;GO:0005737//cytoplasm;GO:0005634//nucleus	GO:0003723//RNA binding;GO:0030620//U2 snRNA binding	GO:0007224//smoothened signaling pathway;GO:0060271//cilium morphogenesis;GO:0009411//response to UV;GO:0002520//immune system development
chr4	31379322	31380231	45	101	-1.16636	1.44473e-25	ENSGALG00000010013	3.13787e+22	downstream2k_down	EDNRA	ko04080//Neuroactive ligand-receptor interaction;ko04020//Calcium signaling pathway;ko04270//Vascular smooth muscle contraction	GO:0016021//integral component of membrane	GO:0004871//signal transducer activity;GO:0004930//G-protein coupled receptor activity;GO:0004962//endothelin receptor activity;GO:0005515//protein binding	GO:0007165//signal transduction;GO:0007186//G-protein coupled receptor signaling pathway;GO:0008217//regulation of blood pressure;GO:0042310//vasoconstriction;GO:0048484//enteric nervous system development;GO:0014824//artery smooth muscle contraction;GO:0001569//patterning of blood vessels;GO:0007585//respiratory gaseous exchange;GO:0007507//heart development;GO:0015758//glucose transport;GO:0001…
chrZ	76687377	76688312	57	115	-1.0126	2.62887e-23	ENSGALG00000022253	7.66863e+22	downstream2k_down	-	-	GO:0005634//nucleus	GO:0003677//DNA binding;GO:0003700//sequence-specific DNA binding transcription factor activity	GO:0006355//regulation of transcription, DNA-templated
chr7	14933982	14934867	55	111	-1.01306	1.67076e-22	ENSGALG00000009172	1.49338e+22	downstream2k_down	OSBPL6	-	GO:0005829//cytosol;GO:0005886//plasma membrane;GO:0031965//nuclear membrane;GO:0097038//perinuclear endoplasmic reticulum	GO:0005515//protein binding	GO:0006810//transport;GO:0006869//lipid transport
chr8	25572344	25573839	55	111	-1.01306	1.67076e-22	ENSGALG00000020625	2.55719e+23	downstream2k_down	-	-	-	GO:0005506//iron ion binding;GO:0016705//oxidoreductase activity, acting on paired donors, with incorporation or reduction of molecular oxygen;GO:0020037//heme binding	GO:0055114//oxidation-reduction process
chrZ	62611530	62612162	52	106	-1.02748	5.65573e-22	ENSGALG00000015620	6.26111e+22	downstream2k_down	XRCC4	ko03450//Non-homologous end-joining	GO:0005634//nucleus;GO:0005813//centrosome;GO:0030054//cell junction;GO:0005829//cytosol;GO:0032807//DNA ligase IV complex;GO:0005958//DNA-dependent protein kinase-DNA ligase 4 complex;GO:0070419//nonhomologous end joining complex	GO:0003677//DNA binding;GO:0005515//protein binding;GO:0008022//protein C-terminus binding	GO:0006302//double-strand break repair;GO:0006310//DNA recombination;GO:0051103//DNA ligation involved in DNA repair;GO:0006303//double-strand break repair via nonhomologous end joining;GO:0051351//positive regulation of ligase activity;GO:0010165//response to X-ray;GO:0033077//T cell differentiation in thymus;GO:0007417//central nervous system development;GO:0043524//negative regulation of neuro…
chr20	5835004	5839088	5405	2157	1.32527	0	ENSGALG00000004321	5837979,5838027,49,49	five-UTR_up	C20H20ORF111	-	-	-	-
chrJH376238.1	3677	5530	467	195	1.25995	2.00714e-149	ENSGALG00000022247	40204265246246	five-UTR_up	-	-	-	-	-
chrAADN03025979.1	2536	6125	172	61	1.49553	8.85512e-71	ENSGALG00000018582	3055,3137,83,83	five-UTR_up	-	-	-	-	-
chrJH375961.1	3	1001	116	28	2.05063	1.15006e-70	ENSGALG00000027939	972,985,14,14	five-UTR_up	-	-	-	GO:0005515//protein binding;GO:0005515//protein binding;GO:0005515//protein binding	-
chrAADN03024745.1	1	816	131	40	1.71149	2.34165e-64	ENSGALG00000013973	21,71,51,51	five-UTR_up	-	-	-	-	-
chrAADN03012208.1	1	1360	189	89	1.08651	5.55507e-50	ENSGALG00000026765	21179159159	five-UTR_up	CPNE5	-	GO:0070062//extracellular vesicular exosome;GO:0043025//neuronal cell body;GO:0043005//neuron projection	-	-
chr10	3120606	3122118	152	68	1.16046	1.81886e-44	ENSGALG00000003014	3.12189e+19	five-UTR_up	CHRNA3	ko04080//Neuroactive ligand-receptor interaction;ko04725//Cholinergic synapse	GO:0005886//plasma membrane;GO:0016020//membrane;GO:0016021//integral component of membrane;GO:0030054//cell junction;GO:0045202//synapse;GO:0045211//postsynaptic membrane;GO:0005892//acetylcholine-gated channel complex;GO:0005886//plasma membrane;GO:0016020//membrane;GO:0016021//integral component of membrane;GO:0030054//cell junction;GO:0045202//synapse;GO:0045211//postsynaptic membrane	GO:0004889//acetylcholine-activated cation-selective channel activity;GO:0005216//ion channel activity;GO:0005230//extracellular ligand-gated ion channel activity;GO:0015464//acetylcholine receptor activity;GO:0005515//protein binding;GO:0004889//acetylcholine-activated cation-selective channel activity;GO:0005216//ion channel activity;GO:0005230//extracellular ligand-gated ion channel activity	GO:0006810//transport;GO:0006811//ion transport;GO:0006812//cation transport;GO:0034220//ion transmembrane transport;GO:0007165//signal transduction;GO:0007399//nervous system development;GO:0060084//synaptic transmission involved in micturition;GO:0035095//behavioral response to nicotine;GO:0007626//locomotory behavior;GO:0042391//regulation of membrane potential;GO:0048814//regulation of dendri…
chrZ	10653467	10654579	166	81	1.03519	4.70391e-41	ENSGALG00000023552	10653658,10653696,39,39	five-UTR_up	SPEF2	-	GO:0005737//cytoplasm;GO:0005794//Golgi apparatus;GO:0097225//sperm midpiece;GO:0002177//manchette	GO:0005515//protein binding	GO:0007283//spermatogenesis;GO:0048854//brain morphogenesis;GO:0060271//cilium morphogenesis;GO:0035082//axoneme assembly;GO:0009566//fertilization;GO:0048705//skeletal system morphogenesis;GO:0010259//multicellular organismal aging;GO:0002520//immune system development;GO:0060541//respiratory system development;GO:0048702//embryonic neurocranium morphogenesis
chr5	35397940	35398836	126	59	1.09464	3.59314e-34	ENSGALG00000010054	3.53983e+21	five-UTR_up	-	-	-	-	-
chr4	81889561	81891046	120	57	1.074	1.18316e-31	ENSGALG00000015664	81889923,81889940,18,18	five-UTR_up	ADD1	-	GO:0005856//cytoskeleton;GO:0005886//plasma membrane;GO:0005634//nucleus;GO:0005925//focal adhesion;GO:0008290//F-actin capping protein complex;GO:0045111//intermediate filament cytoskeleton;GO:0016020//membrane	GO:0042803//protein homodimerization activity;GO:0046982//protein heterodimerization activity;GO:0008134//transcription factor binding;GO:0051015//actin filament binding;GO:0030507//spectrin binding;GO:0005198//structural molecule activity	GO:0032092//positive regulation of protein binding;GO:0051017//actin filament bundle assembly;GO:0051016//barbed-end actin filament capping;GO:0035264//multicellular organism growth;GO:0000902//cell morphogenesis;GO:0030218//erythrocyte differentiation;GO:0020027//hemoglobin metabolic process;GO:0048873//homeostasis of number of cells within a tissue;GO:0006884//cell volume homeostasis
chrJH376137.1	169	610	102	45	1.18057	4.8326e-31	ENSGALG00000026398	412,413,2,2	five-UTR_up	-	-	-	-	-
chr5	26185247	26186231	123	60	1.03562	5.56378e-31	ENSGALG00000009368	26185797,26185817,21,21	five-UTR_up	RGS6	-	GO:0005834//heterotrimeric G-protein complex;GO:0005834//heterotrimeric G-protein complex	GO:0004871//signal transducer activity;GO:0004871//signal transducer activity;GO:0005515//protein binding	GO:0007186//G-protein coupled receptor signaling pathway;GO:0035556//intracellular signal transduction;GO:0038032//termination of G-protein coupled receptor signaling pathway;GO:0008277//regulation of G-protein coupled receptor protein signaling pathway;GO:0007186//G-protein coupled receptor signaling pathway;GO:0035556//intracellular signal transduction;GO:0038032//termination of G-protein coupl…
chrJH376323.1	23044	24361	476	1070	-1.16858	8.02692e-257	ENSGALG00000014317	23070,23108,39,39	five-UTR_down	-	-	-	GO:0030246//carbohydrate binding	-
chrJH375229.1	3104	4616	0	138	#NUM!	1.64655e-229	ENSGALG00000022690	37693909141141	five-UTR_down	-	-	-	GO:0003824//catalytic activity	GO:0008152//metabolic process
chrJH375335.1	7108	9594	230	501	-1.12318	9.9231e-114	ENSGALG00000025880	92629525264264	five-UTR_down	-	-	-	GO:0008270//zinc ion binding;GO:0046872//metal ion binding	-
chrAADN03026614.1	403	1543	6	110	-4.1964	8.39275e-113	ENSGALG00000027239	9001023124124	five-UTR_down	-	-	-	GO:0003779//actin binding;GO:0008017//microtubule binding;GO:0016887//ATPase activity;GO:0005515//protein binding	GO:0006200//ATP catabolic process;GO:0016055//Wnt signaling pathway
chrJH376031.1	942	2184	47	197	-2.06746	3.20352e-109	ENSGALG00000026905	10101835826826	five-UTR_down	-	-	-	GO:0005515//protein binding	-
chrAADN03013519.1	12	748	73	213	-1.54489	4.13505e-80	ENSGALG00000026540	315,356,42,42	five-UTR_down	-	-	-	GO:0004497//monooxygenase activity;GO:0005506//iron ion binding;GO:0016491//oxidoreductase activity;GO:0016705//oxidoreductase activity, acting on paired donors, with incorporation or reduction of molecular oxygen;GO:0020037//heme binding;GO:0046872//metal ion binding	GO:0055114//oxidation-reduction process
chrJH376326.1	16	1680	48	158	-1.71882	1.94191e-69	ENSGALG00000028179	15351781247146	five-UTR_down	-	-	-	GO:0005515//protein binding	-
chrAADN03023939.1	875	2675	50	157	-1.65076	2.32448e-65	ENSGALG00000018583	2590,2592,3,3	five-UTR_down	-	-	-	-	-
chrAADN03019574.1	11	1063	34	128	-1.91254	6.98424e-65	ENSGALG00000010880	21,70,50,50	five-UTR_down	-	-	-	GO:0003676//nucleic acid binding;GO:0003700//sequence-specific DNA binding transcription factor activity;GO:0046872//metal ion binding	GO:0006355//regulation of transcription, DNA-templated
chrJH376400.1	5164	6577	38	132	-1.79647	1.21549e-61	ENSGALG00000028353	6371,6440,70,70	five-UTR_down	-	-	-	GO:0005515//protein binding	-
chr4	58050842	58051893	54	152	-1.49304	4.79696e-55	ENSGALG00000012216	58051553,58051610,58,58	five-UTR_down	BMPR1B	ko04060//Cytokine-cytokine receptor interaction;ko04350//TGF-beta signaling pathway	GO:0016020//membrane;GO:0016021//integral component of membrane;GO:0044214//fully spanning plasma membrane;GO:0016020//membrane;GO:0016021//integral component of membrane;GO:0044214//fully spanning plasma membrane	GO:0000166//nucleotide binding;GO:0004672//protein kinase activity;GO:0004674//protein serine/threonine kinase activity;GO:0004702//receptor signaling protein serine/threonine kinase activity;GO:0005524//ATP binding;GO:0016301//kinase activity;GO:0016740//transferase activity;GO:0016772//transferase activity, transferring phosphorus-containing groups;GO:0004675//transmembrane receptor protein ser…	GO:0006468//protein phosphorylation;GO:0007178//transmembrane receptor protein serine/threonine kinase signaling pathway;GO:0016310//phosphorylation;GO:0023014//signal transduction by phosphorylation;GO:0002063//chondrocyte development;GO:0006468//protein phosphorylation;GO:0007178//transmembrane receptor protein serine/threonine kinase signaling pathway;GO:0016310//phosphorylation;GO:0023014//si…
chr4	48552198	48553153	42	127	-1.59637	1.13661e-50	ENSGALG00000011336	48552953,48552999,47,47	five-UTR_down	TECRL	-	GO:0005737//cytoplasm;GO:0016020//membrane;GO:0016021//integral component of membrane	GO:0016627//oxidoreductase activity, acting on the CH-CH group of donors	GO:0006629//lipid metabolic process;GO:0055114//oxidation-reduction process
chr8	18792389	18794353	64	157	-1.29462	6.1256e-46	ENSGALG00000010053	18794148,18794228,81,81	five-UTR_down	PTPRF	ko04910//Insulin signaling pathway;ko04514//Cell adhesion molecules (CAMs);ko04520//Adherens junction	GO:0070062//extracellular vesicular exosome	GO:0004721//phosphoprotein phosphatase activity;GO:0004725//protein tyrosine phosphatase activity;GO:0016787//hydrolase activity;GO:0016791//phosphatase activity;GO:0005515//protein binding;GO:0032403//protein complex binding	GO:0006470//protein dephosphorylation;GO:0016311//dephosphorylation;GO:0035335//peptidyl-tyrosine dephosphorylation;GO:0016477//cell migration;GO:1900121//negative regulation of receptor binding
chr5	36476734	36478099	26	93	-1.83872	2.48924e-45	ENSGALG00000010137	3.64775e+21	five-UTR_down	TTC6	-	-	GO:0005515//protein binding	-
chr28	1678515	1679560	103	209	-1.02086	1.62984e-41	ENSGALG00000001596	1678507,1678571,65,57	five-UTR_down	MLLT1	-	GO:0005634//nucleus;GO:0005730//nucleolus;GO:0005737//cytoplasm;GO:0008023//transcription elongation factor complex	GO:0005515//protein binding	GO:0006355//regulation of transcription, DNA-templated;GO:0006469//negative regulation of protein kinase activity
chr10	6857338	6858255	63	141	-1.16227	5.71533e-35	ENSGALG00000004294	6857889,6857906,18,18	five-UTR_down	CGNL1	-	GO:0016459//myosin complex;GO:0005923//tight junction;GO:0015629//actin cytoskeleton;GO:0043296//apical junction complex	GO:0003774//motor activity	GO:0008152//metabolic process
chr7	23056593	23057480	64	136	-1.08746	1.75925e-30	ENSGALG00000011493	23057055,23057098,44,44	five-UTR_down	TMEM169	-	-	-	-
chr4	33823033	33824011	52	116	-1.15754	7.4932e-29	ENSGALG00000010201	3.38236e+21	five-UTR_down	C4H4ORF29	-	-	-	-
chr5	1232250	1233748	57	118	-1.04975	3.17758e-25	ENSGALG00000004414	1.23217e+19	five-UTR_down	LUZP2	-	-	-	-
chr4	31217709	31218885	56	115	-1.03814	3.91253e-24	ENSGALG00000010009	3.12181e+21	five-UTR_down	TTC29	-	-	GO:0005515//protein binding	-
chr4	13881361	13882255	54	111	-1.03953	1.692e-23	ENSGALG00000008141	13881915,13882013,99,99	five-UTR_down	COL4A5	ko05200//Pathways in cancer;ko04510//Focal adhesion;ko05146//Amoebiasis;ko05222//Small cell lung cancer;ko04512//ECM-receptor interaction;ko04974//Protein digestion and absorption	GO:0005581//collagen trimer;GO:0005604//basement membrane;GO:0031594//neuromuscular junction;GO:0005605//basal lamina;GO:0005587//collagen type IV trimer	GO:0005201//extracellular matrix structural constituent	GO:0007528//neuromuscular junction development
chrZ	7466448	7467200	47	97	-1.04532	8.16502e-21	ENSGALG00000005806	7467112,7467125,14,14	five-UTR_down	KIF24	-	GO:0005871//kinesin complex;GO:0005874//microtubule;GO:0005814//centriole;GO:0043234//protein complex;GO:0005871//kinesin complex;GO:0005874//microtubule	GO:0000166//nucleotide binding;GO:0003777//microtubule motor activity;GO:0005524//ATP binding;GO:0008017//microtubule binding;GO:0005515//protein binding;GO:0000166//nucleotide binding;GO:0003777//microtubule motor activity;GO:0005524//ATP binding;GO:0008017//microtubule binding;GO:0005515//protein binding	GO:0007018//microtubule-based movement;GO:0008152//metabolic process;GO:0042384//cilium assembly;GO:0007019//microtubule depolymerization;GO:0007018//microtubule-based movement;GO:0008152//metabolic process
chrZ	78313457	78316695	689	179	1.94454	0	ENSGALG00000028413	7.83156e+21	Intron_up	-	-	-	GO:0016849//phosphorus-oxygen lyase activity	GO:0009190//cyclic nucleotide biosynthetic process;GO:0035556//intracellular signal transduction
chrZ	78319697	78323589	476	118	2.01217	3.25482e-278	ENSGALG00000028413	7.83215e+21	Intron_up	-	-	-	GO:0016849//phosphorus-oxygen lyase activity	GO:0009190//cyclic nucleotide biosynthetic process;GO:0035556//intracellular signal transduction
chrZ	80040855	80042780	352	70	2.33015	1.14866e-241	ENSGALG00000018621	8.00083e+24	Intron_up	-	-	GO:0005622//intracellular	-	GO:0007165//signal transduction
chrZ	78317279	78319418	546	194	1.49284	3.54156e-220	ENSGALG00000028413	7.83184e+21	Intron_up	-	-	-	GO:0016849//phosphorus-oxygen lyase activity	GO:0009190//cyclic nucleotide biosynthetic process;GO:0035556//intracellular signal transduction
chrJH376238.1	3677	5530	467	195	1.25995	2.00714e-149	ENSGALG00000022247	47304993264264	Intron_up	-	-	-	-	-
chrZ	73284057	73284588	224	47	2.25277	4.88173e-149	ENSGALG00000028445	7.32843e+21	Intron_up	-	-	-	GO:0016849//phosphorus-oxygen lyase activity;GO:0016849//phosphorus-oxygen lyase activity	GO:0009190//cyclic nucleotide biosynthetic process;GO:0035556//intracellular signal transduction;GO:0009190//cyclic nucleotide biosynthetic process;GO:0035556//intracellular signal transduction
chrZ	78309101	78312928	494	218	1.18018	4.9601e-144	ENSGALG00000028413	7.8311e+21	Intron_up	-	-	-	GO:0016849//phosphorus-oxygen lyase activity	GO:0009190//cyclic nucleotide biosynthetic process;GO:0035556//intracellular signal transduction
chrAADN03021099.1	4806	5756	340	122	1.47865	3.72097e-136	ENSGALG00000027780	5101,5188,88,88	Intron_up	-	-	-	-	-
chr10	10950996	10951773	99	7	3.822	8.623e-102	ENSGALG00000006045	1.09468e+22	Intron_up	SH3GL3	ko04144//Endocytosis	GO:0005737//cytoplasm;GO:0070062//extracellular vesicular exosome	GO:0005515//protein binding;GO:0042802//identical protein binding	GO:0006897//endocytosis
chrZ	80312129	80313527	167	42	1.99139	1.13549e-97	ENSGALG00000018621	8.02212e+25	Intron_up	-	-	GO:0005622//intracellular	-	GO:0007165//signal transduction
chr9	4020464	4021286	119	23	2.37126	1.66669e-84	ENSGALG00000006488	4.01573e+21	Intron_up	RYK	-	GO:0005634//nucleus;GO:0005737//cytoplasm;GO:0005886//plasma membrane;GO:0016020//membrane	GO:0004672//protein kinase activity;GO:0004713//protein tyrosine kinase activity;GO:0005524//ATP binding;GO:0016772//transferase activity, transferring phosphorus-containing groups;GO:0005515//protein binding;GO:0017147//Wnt-protein binding;GO:0005109//frizzled binding;GO:0042813//Wnt-activated receptor activity	GO:0006468//protein phosphorylation;GO:0018108//peptidyl-tyrosine phosphorylation;GO:0031175//neuron projection development;GO:0007409//axonogenesis;GO:0007411//axon guidance;GO:0030182//neuron differentiation;GO:0048705//skeletal system morphogenesis;GO:0016055//Wnt signaling pathway;GO:0050919//negative chemotaxis;GO:0022038//corpus callosum development;GO:0048843//negative regulation of axon e…
chrJH375914.1	1119	1907	115	25	2.20163	9.30839e-76	ENSGALG00000028229	14912245755417	Intron_up	-	-	-	GO:0005515//protein binding	-
chr3	89285684	89286583	119	28	2.08746	7.52871e-74	ENSGALG00000016341	8.92717e+23	Intron_up	CSMD1	-	-	-	GO:0042593//glucose homeostasis;GO:0001964//startle response
chrZ	68029899	68031745	248	109	1.18601	9.02607e-74	ENSGALG00000026659	6.80303e+21	Intron_up	-	-	-	GO:0005488//binding	-
chr4	57750041	57750990	133	38	1.80735	7.32059e-70	ENSGALG00000012185	5.77495e+22	Intron_up	PLA2G12A	ko01100//Metabolic pathways;ko04010//MAPK signaling pathway;ko05145//Toxoplasmosis;ko04270//Vascular smooth muscle contraction;ko04912//GnRH signaling pathway;ko04666//Fc gamma R-mediated phagocytosis;ko04972//Pancreatic secretion;ko00564//Glycerophospholipid metabolism;ko04724//Glutamatergic synapse;ko04664//Fc epsilon RI signaling pathway;ko04370//VEGF signaling pathway;ko04730//Long-term depre…	GO:0005576//extracellular region;GO:0005622//intracellular;GO:0005783//endoplasmic reticulum;GO:0005794//Golgi apparatus	GO:0004623//phospholipase A2 activity;GO:0005509//calcium ion binding	GO:0006644//phospholipid metabolic process;GO:0016042//lipid catabolic process
chrZ	80664940	80665475	196	78	1.32931	1.41556e-68	ENSGALG00000028127	8.0665e+22	Intron_up	-	-	GO:0005634//nucleus	GO:0003677//DNA binding;GO:0003700//sequence-specific DNA binding transcription factor activity	GO:0006355//regulation of transcription, DNA-templated
chr7	4354711	4355517	156	53	1.55748	1.0457e-67	ENSGALG00000003578	4.3335e+21	Intron_up	FN1	ko05200//Pathways in cancer;ko04810//Regulation of actin cytoskeleton;ko04510//Focal adhesion;ko05146//Amoebiasis;ko05222//Small cell lung cancer;ko04512//ECM-receptor interaction;ko05100//Bacterial invasion of epithelial cells	GO:0005576//extracellular region;GO:0031012//extracellular matrix;GO:0005615//extracellular space;GO:0070062//extracellular vesicular exosome;GO:0072562//blood microparticle;GO:0005577//fibrinogen complex;GO:0005793//endoplasmic reticulum-Golgi intermediate compartment;GO:0005604//basement membrane;GO:0016324//apical plasma membrane;GO:0005605//basal lamina;GO:0005576//extracellular region	GO:0005515//protein binding;GO:0002020//protease binding;GO:0005178//integrin binding;GO:0016504//peptidase activator activity;GO:0005515//protein binding	GO:0018149//peptide cross-linking;GO:0035987//endodermal cell differentiation;GO:0034446//substrate adhesion-dependent cell spreading;GO:0033622//integrin activation;GO:0045773//positive regulation of axon extension;GO:0042060//wound healing;GO:0007155//cell adhesion;GO:0007160//cell-matrix adhesion;GO:0007044//cell-substrate junction assembly;GO:0010952//positive regulation of peptidase activity…
chrAADN03024745.1	1	816	131	40	1.71149	2.34165e-64	ENSGALG00000013973	700,796,97,97	Intron_up	-	-	-	-	-
chrZ	8757459	8758612	169	66	1.35649	4.17919e-61	ENSGALG00000002326	8.75481e+21	Intron_up	-	-	GO:0016020//membrane;GO:0016021//integral component of membrane;GO:0001669//acrosomal vesicle	GO:0000166//nucleotide binding;GO:0000287//magnesium ion binding;GO:0004012//phospholipid-translocating ATPase activity;GO:0005524//ATP binding;GO:0016787//hydrolase activity;GO:0019829//cation-transporting ATPase activity;GO:0046872//metal ion binding;GO:0005548//phospholipid transporter activity	GO:0006812//cation transport;GO:0008152//metabolic process;GO:0015914//phospholipid transport;GO:0045332//phospholipid translocation;GO:0007030//Golgi organization
chrAADN03010432.1	11124	11954	220	104	1.08092	2.20347e-57	ENSGALG00000021087	1.10321e+16	Intron_up	-	-	-	GO:0016787//hydrolase activity	GO:0008152//metabolic process
chr17	6082487	6083365	128	43	1.57374	1.50635e-56	ENSGALG00000028635	6.07948e+20	Intron_up	AIF1L	-	GO:0070062//extracellular vesicular exosome;GO:0005925//focal adhesion;GO:0015629//actin cytoskeleton;GO:0005884//actin filament	GO:0005509//calcium ion binding;GO:0051015//actin filament binding	-
chr8	1315255	1316033	128	43	1.57374	1.50635e-56	ENSGALG00000002090	1.31056e+20	Intron_up	GPSM2	-	GO:0005737//cytoplasm;GO:0005634//nucleus;GO:0045177//apical part of cell	GO:0030695//GTPase regulator activity;GO:0005515//protein binding;GO:0042802//identical protein binding	GO:0050790//regulation of catalytic activity;GO:0000132//establishment of mitotic spindle orientation;GO:0060487//lung epithelial cell differentiation
chr3	30152765	30153575	102	28	1.86507	5.36504e-56	ENSGALG00000010296	3.01505e+22	Intron_up	MRPS18A	-	GO:0005622//intracellular;GO:0005840//ribosome;GO:0005763//mitochondrial small ribosomal subunit;GO:0005739//mitochondrion	GO:0003735//structural constituent of ribosome	GO:0006412//translation
chr5	5343086	5344758	166	68	1.28758	5.91702e-56	ENSGALG00000012121	5.34288e+21	Intron_up	RCN1	-	GO:0005783//endoplasmic reticulum	GO:0005509//calcium ion binding;GO:0005515//protein binding	GO:0043010//camera-type eye development
chr4	56159172	56160022	94	24	1.96963	5.35669e-55	ENSGALG00000012036	5.6145e+23	Intron_up	CAMK2D	ko04020//Calcium signaling pathway;ko04310//Wnt signaling pathway;ko05152//Tuberculosis;ko04722//Neurotrophin signaling pathway;ko04114//Oocyte meiosis;ko04916//Melanogenesis;ko04912//GnRH signaling pathway;ko04012//ErbB signaling pathway;ko04725//Cholinergic synapse;ko04971//Gastric acid secretion;ko04720//Long-term potentiation;ko05214//Glioma;ko04740//Olfactory transduction;ko04745//Phototrans…	GO:0016020//membrane	GO:0004672//protein kinase activity;GO:0004674//protein serine/threonine kinase activity;GO:0004683//calmodulin-dependent protein kinase activity;GO:0005516//calmodulin binding;GO:0005524//ATP binding;GO:0016772//transferase activity, transferring phosphorus-containing groups;GO:0004713//protein tyrosine kinase activity;GO:0005515//protein binding;GO:0042803//protein homodimerization activity;GO:…	GO:0006468//protein phosphorylation;GO:0051259//protein oligomerization;GO:0046777//protein autophosphorylation;GO:1902306//negative regulation of sodium ion transmembrane transport;GO:0060341//regulation of cellular localization;GO:0003254//regulation of membrane depolarization;GO:1901897//regulation of relaxation of cardiac muscle;GO:2000650//negative regulation of sodium ion transmembrane tran…
chr10	16920787	16921595	121	40	1.59694	1.13124e-54	ENSGALG00000021874	1.692e+22	Intron_up	-	-	-	-	-
chr5	50499749	50500626	95	25	1.926	3.25327e-54	ENSGALG00000011565	5.04995e+21	Intron_up	TDRD9	-	GO:0005634//nucleus;GO:0071547//piP-body	GO:0000166//nucleotide binding;GO:0003676//nucleic acid binding;GO:0004386//helicase activity;GO:0005524//ATP binding;GO:0016787//hydrolase activity;GO:0005515//protein binding	GO:0007283//spermatogenesis;GO:0009566//fertilization;GO:0007140//male meiosis;GO:0043046//DNA methylation involved in gamete generation;GO:0034587//piRNA metabolic process
chr18	3277418	3278406	133	48	1.47032	5.63568e-54	ENSGALG00000001503	3.20788e+22	Intron_up	TBCD	-	-	GO:0005488//binding;GO:0005096//GTPase activator activity;GO:0005515//protein binding;GO:0048487//beta-tubulin binding;GO:0005488//binding	GO:0006457//protein folding;GO:0031115//negative regulation of microtubule polymerization;GO:0007023//post-chaperonin tubulin folding pathway
chr28	324571	325276	96	26	1.88452	2.6458e-53	ENSGALG00000000327	3.07256e+19	Intron_up	FBN3	-	GO:0005576//extracellular region;GO:0005578//proteinaceous extracellular matrix	GO:0005201//extracellular matrix structural constituent;GO:0005509//calcium ion binding;GO:0005515//protein binding	-
chrLGE64	174925	175615	118	39	1.59724	2.99569e-53	ENSGALG00000027503	1.74897e+18	Intron_up	-	-	-	GO:0005515//protein binding	-
chr3	3680880	3681683	104	31	1.74624	7.23062e-53	ENSGALG00000008410	3.68023e+20	Intron_up	RALGAPA2	-	GO:0005737//cytoplasm;GO:0005615//extracellular space;GO:0005737//cytoplasm;GO:0005886//plasma membrane	GO:0005096//GTPase activator activity;GO:0017123//Ral GTPase activator activity;GO:0005488//binding	GO:0032859//activation of Ral GTPase activity;GO:0051056//regulation of small GTPase mediated signal transduction
chr3	47936041	47937083	141	54	1.38466	1.16099e-52	ENSGALG00000012412	4.79344e+23	Intron_up	MTHFD1L	ko01100//Metabolic pathways;ko00670//One carbon pool by folate	-	GO:0003824//catalytic activity;GO:0004329//formate-tetrahydrofolate ligase activity;GO:0004488//methylenetetrahydrofolate dehydrogenase (NADP+) activity;GO:0005524//ATP binding	GO:0009396//folic acid-containing compound biosynthetic process;GO:0055114//oxidation-reduction process
chr4	62392106	62392904	95	26	1.86942	3.18629e-52	ENSGALG00000026364	6.2392e+21	Intron_up	ASAH1	ko01100//Metabolic pathways;ko04142//Lysosome;ko00600//Sphingolipid metabolism	GO:0005764//lysosome;GO:0070062//extracellular vesicular exosome	GO:0017040//ceramidase activity	GO:0006629//lipid metabolic process
chr6	19341289	19342229	118	40	1.56071	7.50549e-52	ENSGALG00000001789	1.934e+22	Intron_up	HECTD2	-	-	GO:0004842//ubiquitin-protein ligase activity;GO:0016874//ligase activity	GO:0008152//metabolic process;GO:0016567//protein ubiquitination
chrZ	8588410	8589220	146	58	1.33184	9.18471e-52	ENSGALG00000002165	8.58777e+21	Intron_up	UNC13B	-	GO:0005794//Golgi apparatus;GO:0005829//cytosol;GO:0031594//neuromuscular junction	GO:0019992//diacylglycerol binding;GO:0046872//metal ion binding;GO:0005515//protein binding	GO:0007268//synaptic transmission;GO:0035556//intracellular signal transduction;GO:0035249//synaptic transmission, glutamatergic;GO:0007528//neuromuscular junction development;GO:0016082//synaptic vesicle priming;GO:0048172//regulation of short-term neuronal synaptic plasticity;GO:0016081//synaptic vesicle docking involved in exocytosis;GO:0060384//innervation
chr5	3302465	3303275	130	48	1.43741	2.83206e-51	ENSGALG00000013311	3.27881e+21	Intron_up	ANO3	-	GO:0016020//membrane;GO:0016021//integral component of membrane;GO:0016020//membrane;GO:0016021//integral component of membrane	GO:0017128//phospholipid scramblase activity	-
chr6	27479373	27480278	97	28	1.79256	7.87289e-51	ENSGALG00000009048	2.73595e+24	Intron_up	ABLIM1	-	GO:0030027//lamellipodium;GO:0001725//stress fiber;GO:0015629//actin cytoskeleton	GO:0003779//actin binding;GO:0008270//zinc ion binding;GO:0046872//metal ion binding;GO:0008270//zinc ion binding;GO:0046872//metal ion binding;GO:0005515//protein binding;GO:0003779//actin binding	GO:0007010//cytoskeleton organization;GO:0042384//cilium assembly;GO:0030032//lamellipodium assembly;GO:0045944//positive regulation of transcription from RNA polymerase II promoter;GO:0007411//axon guidance
chrAADN03012208.1	1	1360	189	89	1.08651	5.55507e-50	ENSGALG00000026765	6161325710710	Intron_up	CPNE5	-	GO:0070062//extracellular vesicular exosome;GO:0043025//neuronal cell body;GO:0043005//neuron projection	-	-
chr6	30813769	30814873	151	63	1.26112	1.35475e-49	ENSGALG00000009546	3.08121e+24	Intron_up	HTRA1	-	GO:0031012//extracellular matrix;GO:0070062//extracellular vesicular exosome	GO:0004252//serine-type endopeptidase activity;GO:0005515//protein binding;GO:0003824//catalytic activity;GO:0008236//serine-type peptidase activity	GO:0006508//proteolysis;GO:0030512//negative regulation of transforming growth factor beta receptor signaling pathway;GO:0030514//negative regulation of BMP signaling pathway
chrZ	47579273	47580225	128	48	1.41504	2.1801e-49	ENSGALG00000000276	4.75264e+23	Intron_up	FBXL17	-	-	GO:0005515//protein binding	-
chrZ	34355403	34356246	102	32	1.67243	3.73573e-49	ENSGALG00000015107	3.43334e+23	Intron_up	PIP5K1B	ko01100//Metabolic pathways;ko04810//Regulation of actin cytoskeleton;ko04510//Focal adhesion;ko04144//Endocytosis;ko04666//Fc gamma R-mediated phagocytosis;ko04070//Phosphatidylinositol signaling system;ko00562//Inositol phosphate metabolism	GO:0001931//uropod	GO:0016307//phosphatidylinositol phosphate kinase activity;GO:0005515//protein binding;GO:0016308//1-phosphatidylinositol-4-phosphate 5-kinase activity	GO:0046488//phosphatidylinositol metabolic process;GO:0046854//phosphatidylinositol phosphorylation
chr15	485393	486205	115	40	1.52356	4.60843e-49	ENSGALG00000001496	4.71118e+19	Intron_up	-	-	-	-	-
chr5	22876692	22877431	100	31	1.68966	7.00217e-49	ENSGALG00000008358	2.28589e+23	Intron_up	AMBRA1	-	GO:0005737//cytoplasm;GO:0005930//axoneme;GO:0045335//phagocytic vesicle	GO:0005515//protein binding	GO:0006914//autophagy;GO:0008285//negative regulation of cell proliferation;GO:0021915//neural tube development;GO:0043524//negative regulation of neuron apoptotic process
chr6	34340863	34341989	153	65	1.23502	9.67586e-49	ENSGALG00000010486	3.43378e+24	Intron_up	JAKMIP3	-	-	GO:0008017//microtubule binding;GO:0019900//kinase binding	-
chr15	3086633	3087410	132	51	1.37197	9.82278e-49	ENSGALG00000002536	2.9787e+22	Intron_up	STX2	ko04130//SNARE interactions in vesicular transport	GO:0016020//membrane;GO:0016021//integral component of membrane;GO:0070062//extracellular vesicular exosome;GO:0016323//basolateral plasma membrane;GO:0031410//cytoplasmic vesicle;GO:0009986//cell surface;GO:0005911//cell-cell junction;GO:0045121//membrane raft	GO:0005515//protein binding	GO:0007340//acrosome reaction;GO:0016192//vesicle-mediated transport;GO:0030154//cell differentiation;GO:0010468//regulation of gene expression;GO:0030193//regulation of blood coagulation
chr18	3164316	3165075	164	73	1.16773	3.10006e-48	ENSGALG00000001433	3.12934e+21	Intron_up	B3GNTL1	-	-	GO:0016740//transferase activity;GO:0016757//transferase activity, transferring glycosyl groups	GO:0008152//metabolic process
chr18	1120002	1120863	191	92	1.05387	3.54171e-48	ENSGALG00000001111	1.11527e+20	Intron_up	DNAH9	-	GO:0030286//dynein complex;GO:0005930//axoneme	GO:0000166//nucleotide binding;GO:0003777//microtubule motor activity;GO:0005524//ATP binding;GO:0016887//ATPase activity;GO:0017111//nucleoside-triphosphatase activity	GO:0006200//ATP catabolic process;GO:0007018//microtubule-based movement;GO:0008152//metabolic process
chr5	28688172	28689291	158	69	1.19526	4.15198e-48	ENSGALG00000014537	2.86775e+24	Intron_up	BMF	-	GO:0005737//cytoplasm;GO:0015629//actin cytoskeleton;GO:0016459//myosin complex	GO:0005515//protein binding	GO:0006915//apoptotic process;GO:0006915//apoptotic process;GO:0043276//anoikis;GO:2001234//negative regulation of apoptotic signaling pathway;GO:2001235//positive regulation of apoptotic signaling pathway;GO:0090200//positive regulation of release of cytochrome c from mitochondria;GO:0032464//positive regulation of protein homooligomerization
chr3	108482427	108483274	103	34	1.59904	8.16356e-47	ENSGALG00000016704	1.08483e+23	Intron_up	CDC5L	ko03040//Spliceosome	GO:0005730//nucleolus;GO:0016020//membrane;GO:0005634//nucleus;GO:0000974//Prp19 complex;GO:0005662//DNA replication factor A complex;GO:0071013//catalytic step 2 spliceosome;GO:0016607//nuclear speck	GO:0003677//DNA binding;GO:0003682//chromatin binding;GO:0005515//protein binding;GO:0071987//WD40-repeat domain binding	GO:0072422//signal transduction involved in DNA damage checkpoint
chrZ	81453343	81454337	131	52	1.33298	1.29503e-46	ENSGALG00000005354	8.14523e+22	Intron_up	ZBTB5	-	GO:0005634//nucleus	GO:0003676//nucleic acid binding;GO:0046872//metal ion binding;GO:0005515//protein binding	-
chr6	25340532	25341383	123	47	1.38793	2.79604e-46	ENSGALG00000008542	2.53401e+22	Intron_up	ADD3	-	GO:0005856//cytoskeleton;GO:0005856//cytoskeleton;GO:0005856//cytoskeleton;GO:0005737//cytoplasm;GO:0016020//membrane;GO:0005911//cell-cell junction;GO:0005938//cell cortex;GO:0000794//condensed nuclear chromosome	GO:0005198//structural molecule activity	-
chr3	109629075	109629899	177	84	1.07529	4.64287e-46	ENSGALG00000016720	1.0962e+25	Intron_up	CD2AP	-	GO:0070062//extracellular vesicular exosome;GO:0001726//ruffle;GO:0031941//filamentous actin;GO:0005737//cytoplasm;GO:0005886//plasma membrane;GO:0005911//cell-cell junction	GO:0005515//protein binding;GO:0005515//protein binding;GO:0017124//SH3 domain binding	GO:1900182//positive regulation of protein localization to nucleus;GO:2000249//regulation of actin cytoskeleton reorganization;GO:0032911//negative regulation of transforming growth factor beta1 production
chr5	18612321	18612897	121	46	1.3953	6.58013e-46	ENSGALG00000007895	1.85966e+23	Intron_up	LDLRAD3	-	GO:0030054//cell junction;GO:0005886//plasma membrane;GO:0016020//membrane	GO:0005515//protein binding;GO:0001540//beta-amyloid binding	GO:0006898//receptor-mediated endocytosis;GO:0070613//regulation of protein processing
chrZ	51544772	51545739	148	64	1.20945	6.82202e-46	ENSGALG00000026811	5.15285e+23	Intron_up	-	-	-	GO:0001948//glycoprotein binding	GO:0045931//positive regulation of mitotic cell cycle;GO:0030097//hemopoiesis;GO:0001568//blood vessel development;GO:0006469//negative regulation of protein kinase activity;GO:0042100//B cell proliferation;GO:0048514//blood vessel morphogenesis;GO:0071425//hematopoietic stem cell proliferation;GO:1900194//negative regulation of oocyte maturation
chrZ	47730622	47731187	100	33	1.59946	1.12825e-45	ENSGALG00000000276	4.77022e+23	Intron_up	FBXL17	-	-	GO:0005515//protein binding	-
chr6	21844692	21845951	172	81	1.08641	1.2333e-45	ENSGALG00000007531	2.18418e+23	Intron_up	ZFYVE27	-	GO:0005783//endoplasmic reticulum;GO:0005737//cytoplasm;GO:0030425//dendrite;GO:0030424//axon;GO:0032584//growth cone membrane	GO:0046872//metal ion binding;GO:0005515//protein binding;GO:0046872//metal ion binding	GO:0031175//neuron projection development
chr5	15346164	15346906	137	57	1.26514	2.47965e-45	ENSGALG00000006879	1.52976e+23	Intron_up	LRRC56	-	-	GO:0005515//protein binding	-
chr3	37782479	37783442	125	49	1.35107	2.76576e-45	ENSGALG00000011000	3.77824e+22	Intron_up	TARBP1	-	-	GO:0003723//RNA binding;GO:0008173//RNA methyltransferase activity;GO:0005488//binding	GO:0001510//RNA methylation;GO:0006396//RNA processing
chr13	13714046	13715168	117	44	1.41093	4.46039e-45	ENSGALG00000006086	1.37128e+23	Intron_up	FAM13B	-	GO:0005622//intracellular	-	GO:0007165//signal transduction
chrZ	54577026	54577803	141	60	1.23266	5.84017e-45	ENSGALG00000015433	5.45502e+23	Intron_up	ABCA1	ko04975//Fat digestion and absorption;ko02010//ABC transporters	GO:0005887//integral component of plasma membrane;GO:0005886//plasma membrane;GO:0048471//perinuclear region of cytoplasm;GO:0045121//membrane raft;GO:0045335//phagocytic vesicle;GO:0030139//endocytic vesicle;GO:0009897//external side of plasma membrane;GO:0005794//Golgi apparatus;GO:0043231//intracellular membrane-bounded organelle	GO:0000166//nucleotide binding;GO:0005524//ATP binding;GO:0016887//ATPase activity;GO:0017111//nucleoside-triphosphatase activity;GO:0000166//nucleotide binding;GO:0005524//ATP binding;GO:0016887//ATPase activity;GO:0017111//nucleoside-triphosphatase activity;GO:0005515//protein binding;GO:0005102//receptor binding;GO:0017127//cholesterol transporter activity;GO:0019905//syntaxin binding;GO:00341…	GO:0006200//ATP catabolic process;GO:0008152//metabolic process;GO:0006200//ATP catabolic process;GO:0007186//G-protein coupled receptor signaling pathway;GO:0016197//endosomal transport;GO:0043691//reverse cholesterol transport;GO:0008203//cholesterol metabolic process;GO:0042632//cholesterol homeostasis;GO:0007040//lysosome organization;GO:0060155//platelet dense granule organization;GO:0055098…
chr3	6481775	6482546	112	41	1.4498	9.60845e-45	ENSGALG00000009107	6.45201e+21	Intron_up	NRXN1	ko04514//Cell adhesion molecules (CAMs)	GO:0016020//membrane;GO:0016021//integral component of membrane;GO:0009986//cell surface;GO:0042734//presynaptic membrane	GO:0005515//protein binding;GO:0033130//acetylcholine receptor binding;GO:0005246//calcium channel regulator activity;GO:0050839//cell adhesion molecule binding;GO:0097109//neuroligin family protein binding	GO:0042297//vocal learning;GO:0071625//vocalization behavior;GO:0030534//adult behavior;GO:0007612//learning;GO:0035176//social behavior;GO:0007268//synaptic transmission;GO:0050885//neuromuscular process controlling balance;GO:0007416//synapse assembly;GO:0060134//prepulse inhibition;GO:0007269//neurotransmitter secretion;GO:0051965//positive regulation of synapse assembly;GO:0061178//regulation…
chr5	35413622	35414456	189	94	1.00765	9.67806e-45	ENSGALG00000010054	3.54018e+23	Intron_up	-	-	-	-	-
chr3	87657229	87658012	102	35	1.54314	1.3686e-44	ENSGALG00000016314	8.76549e+23	Intron_up	ELOVL5	ko00062//Fatty acid elongation in mitochondria;ko01040//Biosynthesis of unsaturated fatty acids	GO:0016020//membrane;GO:0016021//integral component of membrane;GO:0005783//endoplasmic reticulum	GO:0016740//transferase activity;GO:0005515//protein binding;GO:0009922//fatty acid elongase activity	GO:0006629//lipid metabolic process;GO:0006631//fatty acid metabolic process;GO:0006633//fatty acid biosynthetic process;GO:0042761//very long-chain fatty acid biosynthetic process;GO:0034626//fatty acid elongation, polyunsaturated fatty acid;GO:0034625//fatty acid elongation, monounsaturated fatty acid
chr3	96482967	96483879	142	61	1.21901	1.65347e-44	ENSGALG00000016446	9.64821e+22	Intron_up	ATP6V1C2	ko01100//Metabolic pathways;ko04145//Phagosome;ko00190//Oxidative phosphorylation;ko05120//Epithelial cell signaling in Helicobacter pylori infection;ko05323//Rheumatoid arthritis;ko05110//Vibrio cholerae infection;ko04966//Collecting duct acid secretion	GO:0033180//proton-transporting V-type ATPase, V1 domain;GO:0070062//extracellular vesicular exosome;GO:0005765//lysosomal membrane	GO:0015078//hydrogen ion transmembrane transporter activity;GO:0046983//protein dimerization activity;GO:0008553//hydrogen-exporting ATPase activity, phosphorylative mechanism	GO:0015991//ATP hydrolysis coupled proton transport;GO:0030177//positive regulation of Wnt signaling pathway
chr14	6927170	6927996	105	37	1.50479	4.1285e-44	ENSGALG00000006156	6.92766e+19	Intron_up	COG7	-	GO:0017119//Golgi transport complex;GO:0005794//Golgi apparatus	GO:0005515//protein binding	GO:0006886//intracellular protein transport;GO:0050821//protein stabilization;GO:0006486//protein glycosylation;GO:0006890//retrograde vesicle-mediated transport, Golgi to ER;GO:0033365//protein localization to organelle;GO:0034067//protein localization to Golgi apparatus
chr3	33637327	33638290	112	42	1.41504	1.8116e-43	ENSGALG00000010653	3.36077e+23	Intron_up	SMYD3	-	GO:0005634//nucleus	GO:0005515//protein binding;GO:0000979//RNA polymerase II core promoter sequence-specific DNA binding;GO:0018024//histone-lysine N-methyltransferase activity;GO:0000993//RNA polymerase II core binding;GO:0001162//RNA polymerase II intronic transcription regulatory region sequence-specific DNA binding	GO:0045944//positive regulation of transcription from RNA polymerase II promoter;GO:0071549//cellular response to dexamethasone stimulus;GO:0014904//myotube cell development;GO:0006469//negative regulation of protein kinase activity;GO:0033138//positive regulation of peptidyl-serine phosphorylation;GO:0006334//nucleosome assembly;GO:0045184//establishment of protein localization
chr6	23259019	23260051	115	44	1.38606	2.29015e-43	ENSGALG00000008281	2.32022e+24	Intron_up	NEURL	-	GO:0005886//plasma membrane;GO:0005737//cytoplasm;GO:0043204//perikaryon;GO:0043197//dendritic spine;GO:0014069//postsynaptic density;GO:0097440//apical dendrite	GO:0008270//zinc ion binding;GO:0046872//metal ion binding;GO:0005515//protein binding;GO:0004842//ubiquitin-protein ligase activity;GO:0045183//translation factor activity, non-nucleic acid binding;GO:0008270//zinc ion binding;GO:0046872//metal ion binding;GO:0005515//protein binding	GO:0043065//positive regulation of apoptotic process;GO:0008285//negative regulation of cell proliferation;GO:0045746//negative regulation of Notch signaling pathway;GO:0030317//sperm motility;GO:0071230//cellular response to amino acid stimulus;GO:0051491//positive regulation of filopodium assembly;GO:0048170//positive regulation of long-term neuronal synaptic plasticity;GO:0006513//protein mono…
chrJH375458.1	47022	47952	127	52	1.28824	3.59115e-43	ENSGALG00000017781	4.67455e+16	Intron_up	-	-	-	GO:0005515//protein binding;GO:0005515//protein binding	-
chrZ	12185090	12185809	137	59	1.21539	6.7811e-43	ENSGALG00000003792	1.21316e+23	Intron_up	FYB	-	-	GO:0005515//protein binding;GO:0005515//protein binding	-
chrLGE22C19W28_E50C23	900397	901149	106	39	1.44252	4.9492e-42	ENSGALG00000006665	9.00546e+18	Intron_up	GALNT6	ko01100//Metabolic pathways;ko00512//Mucin type O-Glycan biosynthesis	GO:0005794//Golgi apparatus;GO:0016020//membrane;GO:0016021//integral component of membrane;GO:0048471//perinuclear region of cytoplasm	GO:0004653//polypeptide N-acetylgalactosaminyltransferase activity;GO:0016740//transferase activity;GO:0016757//transferase activity, transferring glycosyl groups;GO:0046872//metal ion binding;GO:0004653//polypeptide N-acetylgalactosaminyltransferase activity	GO:0006486//protein glycosylation
chr4	44337705	44338236	118	47	1.32805	7.52497e-42	ENSGALG00000010885	4.43367e+23	Intron_up	BMP2K	-	GO:0005634//nucleus	GO:0004672//protein kinase activity;GO:0004674//protein serine/threonine kinase activity;GO:0005524//ATP binding;GO:0016772//transferase activity, transferring phosphorus-containing groups;GO:0004713//protein tyrosine kinase activity;GO:0019208//phosphatase regulator activity	GO:0006468//protein phosphorylation;GO:0050790//regulation of catalytic activity;GO:0030500//regulation of bone mineralization
chrZ	10653467	10654579	166	81	1.03519	4.70391e-41	ENSGALG00000023552	1.06538e+21	Intron_up	SPEF2	-	GO:0005737//cytoplasm;GO:0005794//Golgi apparatus;GO:0097225//sperm midpiece;GO:0002177//manchette	GO:0005515//protein binding	GO:0007283//spermatogenesis;GO:0048854//brain morphogenesis;GO:0060271//cilium morphogenesis;GO:0035082//axoneme assembly;GO:0009566//fertilization;GO:0048705//skeletal system morphogenesis;GO:0010259//multicellular organismal aging;GO:0002520//immune system development;GO:0060541//respiratory system development;GO:0048702//embryonic neurocranium morphogenesis
chr16	273524	274313	98	35	1.48543	7.58749e-41	ENSGALG00000028157	2.68931e+19	Intron_up	-	-	GO:0016020//membrane;GO:0016021//integral component of membrane;GO:0016020//membrane;GO:0016021//integral component of membrane	GO:0005515//protein binding;GO:0005515//protein binding	-
chr6	23222225	23223064	112	44	1.34792	9.33654e-41	ENSGALG00000008281	2.32022e+23	Intron_up	NEURL	-	GO:0005886//plasma membrane;GO:0005737//cytoplasm;GO:0043204//perikaryon;GO:0043197//dendritic spine;GO:0014069//postsynaptic density;GO:0097440//apical dendrite	GO:0008270//zinc ion binding;GO:0046872//metal ion binding;GO:0005515//protein binding;GO:0004842//ubiquitin-protein ligase activity;GO:0045183//translation factor activity, non-nucleic acid binding;GO:0008270//zinc ion binding;GO:0046872//metal ion binding;GO:0005515//protein binding	GO:0043065//positive regulation of apoptotic process;GO:0008285//negative regulation of cell proliferation;GO:0045746//negative regulation of Notch signaling pathway;GO:0030317//sperm motility;GO:0071230//cellular response to amino acid stimulus;GO:0051491//positive regulation of filopodium assembly;GO:0048170//positive regulation of long-term neuronal synaptic plasticity;GO:0006513//protein mono…
chr6	27615194	27615918	124	52	1.25376	1.13251e-40	ENSGALG00000009091	2.76121e+22	Intron_up	TRUB1	-	-	GO:0003723//RNA binding;GO:0009982//pseudouridine synthase activity	GO:0001522//pseudouridine synthesis;GO:0006396//RNA processing;GO:0009451//RNA modification
chrJH375960.1	3923	5241	169	84	1.00856	4.06038e-40	ENSGALG00000028509	41034472370370	Intron_up	-	-	-	-	-
chr3	47440384	47441322	101	38	1.41028	3.73231e-39	ENSGALG00000012370	4.74399e+22	Intron_up	C3H6ORF72	-	GO:0070062//extracellular vesicular exosome	-	-
chr26	4697908	4699099	132	59	1.16175	8.29396e-39	ENSGALG00000023780	4.69349e+21	Intron_up	TREML2	-	-	GO:0005515//protein binding;GO:0005515//protein binding;GO:0005515//protein binding	-
chr4	89302589	89303318	123	53	1.21459	1.25739e-38	ENSGALG00000016094	8.92985e+22	Intron_up	SFXN5	-	GO:0016020//membrane;GO:0005743//mitochondrial inner membrane	GO:0008324//cation transmembrane transporter activity;GO:0015075//ion transmembrane transporter activity	GO:0006812//cation transport;GO:0055085//transmembrane transport;GO:0006811//ion transport
chrZ	47738146	47738885	102	39	1.38702	1.36391e-38	ENSGALG00000000276	4.77022e+23	Intron_up	FBXL17	-	-	GO:0005515//protein binding	-
chr10	6519481	6520164	147	70	1.07039	1.77595e-38	ENSGALG00000004212	6.4742e+22	Intron_up	ADAM10	-	GO:0005794//Golgi apparatus;GO:0070062//extracellular vesicular exosome;GO:0016020//membrane;GO:0009986//cell surface;GO:0097197//tetraspanin-enriched microdomain;GO:0005925//focal adhesion;GO:0097038//perinuclear endoplasmic reticulum;GO:0005798//Golgi-associated vesicle;GO:0005634//nucleus;GO:0005737//cytoplasm;GO:0014069//postsynaptic density	GO:0004222//metalloendopeptidase activity;GO:0008237//metallopeptidase activity;GO:0008270//zinc ion binding;GO:0005515//protein binding;GO:0042803//protein homodimerization activity;GO:0019901//protein kinase binding;GO:0004175//endopeptidase activity;GO:0004222//metalloendopeptidase activity;GO:0008237//metallopeptidase activity;GO:0008270//zinc ion binding	GO:0006508//proteolysis;GO:0006509//membrane protein ectodomain proteolysis;GO:0007219//Notch signaling pathway;GO:0008284//positive regulation of cell proliferation;GO:0034612//response to tumor necrosis factor;GO:0030307//positive regulation of cell growth;GO:0030335//positive regulation of cell migration;GO:0051089//constitutive protein ectodomain proteolysis;GO:0051088//PMA-inducible membrane…
chr15	5920683	5921525	100	38	1.39593	3.21518e-38	ENSGALG00000004515	5.92052e+19	Intron_up	KNTC1	-	GO:0005737//cytoplasm;GO:0005886//plasma membrane;GO:0015629//actin cytoskeleton;GO:0005828//kinetochore microtubule;GO:0000922//spindle pole	GO:0005515//protein binding	GO:0007093//mitotic cell cycle checkpoint
chr15	5929441	5930239	106	42	1.3356	4.47176e-38	ENSGALG00000004515	5.92934e+19	Intron_up	KNTC1	-	GO:0005737//cytoplasm;GO:0005886//plasma membrane;GO:0015629//actin cytoskeleton;GO:0005828//kinetochore microtubule;GO:0000922//spindle pole	GO:0005515//protein binding	GO:0007093//mitotic cell cycle checkpoint
chr3	19158049	19158906	106	42	1.3356	4.47176e-38	ENSGALG00000009627	1.91503e+23	Intron_up	GPATCH2	-	-	GO:0003676//nucleic acid binding	GO:0010923//negative regulation of phosphatase activity
chr8	20193650	20194296	156	77	1.01862	8.5311e-38	ENSGALG00000010313	2.01797e+23	Intron_up	MAST2	-	GO:0005737//cytoplasm;GO:0015630//microtubule cytoskeleton	GO:0000166//nucleotide binding;GO:0000287//magnesium ion binding;GO:0004672//protein kinase activity;GO:0004674//protein serine/threonine kinase activity;GO:0005524//ATP binding;GO:0016301//kinase activity;GO:0016740//transferase activity;GO:0016772//transferase activity, transferring phosphorus-containing groups;GO:0005515//protein binding;GO:0004713//protein tyrosine kinase activity;GO:0019902/…	GO:0006468//protein phosphorylation;GO:0016310//phosphorylation;GO:0045075//regulation of interleukin-12 biosynthetic process
chr10	10362472	10363393	116	49	1.24327	1.06398e-37	ENSGALG00000023440	1.0363e+21	Intron_up	GABPB1	-	GO:0005634//nucleus	GO:0005515//protein binding;GO:0046982//protein heterodimerization activity;GO:0044212//transcription regulatory region DNA binding	GO:0045944//positive regulation of transcription from RNA polymerase II promoter
chrZ	6649203	6649930	101	39	1.37281	1.14865e-37	ENSGALG00000002413	6.63724e+21	Intron_up	CELF4	-	-	GO:0000166//nucleotide binding;GO:0003676//nucleic acid binding;GO:0003729//mRNA binding	GO:0048026//positive regulation of mRNA splicing, via spliceosome;GO:0000380//alternative mRNA splicing, via spliceosome;GO:0000381//regulation of alternative mRNA splicing, via spliceosome;GO:0006376//mRNA splice site selection;GO:0090394//negative regulation of excitatory postsynaptic membrane potential;GO:0048025//negative regulation of mRNA splicing, via spliceosome
chrZ	7670291	7671125	107	43	1.3152	1.46193e-37	ENSGALG00000005831	7.66681e+21	Intron_up	DNAI1	-	-	GO:0005515//protein binding	GO:0003351//epithelial cilium movement
chr4	47572078	47572917	108	44	1.29546	2.71599e-37	ENSGALG00000011319	4.75345e+23	Intron_up	LPHN3	-	GO:0005886//plasma membrane;GO:0016020//membrane;GO:0016021//integral component of membrane	GO:0004871//signal transducer activity;GO:0004888//transmembrane signaling receptor activity;GO:0004930//G-protein coupled receptor activity;GO:0030246//carbohydrate binding;GO:0005515//protein binding	GO:0007165//signal transduction;GO:0007166//cell surface receptor signaling pathway;GO:0007186//G-protein coupled receptor signaling pathway;GO:0007218//neuropeptide signaling pathway
chrZ	33375000	33375948	108	44	1.29546	2.71599e-37	ENSGALG00000020554	3.33735e+22	Intron_up	ADAMTSL1	-	GO:0005578//proteinaceous extracellular matrix;GO:0031012//extracellular matrix	GO:0004222//metalloendopeptidase activity;GO:0008233//peptidase activity;GO:0008237//metallopeptidase activity;GO:0008270//zinc ion binding;GO:0005515//protein binding	GO:0006508//proteolysis
chr15	8434966	8435851	136	64	1.08746	1.66211e-36	ENSGALG00000006607	8.43458e+20	Intron_up	GUCD1	-	-	-	-
chr3	67661546	67662320	118	52	1.1822	8.42278e-36	ENSGALG00000015387	6.7657e+22	Intron_up	ATG5	ko05131//Shigellosis;ko04622//RIG-I-like receptor signaling pathway;ko04140//Regulation of autophagy	GO:0005737//cytoplasm;GO:0005737//cytoplasm;GO:0016020//membrane;GO:0005776//autophagic vacuole;GO:0005930//axoneme;GO:0034045//pre-autophagosomal structure membrane;GO:0044233	GO:0005515//protein binding	GO:0002218//activation of innate immune response;GO:0006914//autophagy;GO:0045087//innate immune response;GO:0006914//autophagy;GO:0043066//negative regulation of apoptotic process;GO:0042493//response to drug;GO:0001974//blood vessel remodeling;GO:0009620//response to fungus;GO:2000377//regulation of reactive oxygen species metabolic process;GO:0051279//regulation of release of sequestered calci…
chrZ	72421972	72422820	135	64	1.07682	1.04176e-35	ENSGALG00000002294	7.23851e+23	Intron_up	SEMA6A	-	GO:0016020//membrane;GO:0016021//integral component of membrane;GO:0005887//integral component of plasma membrane	GO:0004872//receptor activity;GO:0005515//protein binding;GO:0004888//transmembrane signaling receptor activity;GO:0030215//semaphorin receptor binding	GO:0007275//multicellular organismal development;GO:0007166//cell surface receptor signaling pathway;GO:0001764//neuron migration;GO:0051642//centrosome localization;GO:0071526//semaphorin-plexin signaling pathway;GO:2001224//positive regulation of neuron migration
chr26	2381558	2382876	139	67	1.05285	1.72935e-35	ENSGALG00000000816	2.38197e+19	Intron_up	-	-	GO:0005622//intracellular;GO:0005886//plasma membrane;GO:0005743//mitochondrial inner membrane;GO:0005829//cytosol;GO:0014069//postsynaptic density;GO:0045211//postsynaptic membrane;GO:0045335//phagocytic vesicle	GO:0005515//protein binding;GO:0042803//protein homodimerization activity;GO:0030675//Rac GTPase activator activity;GO:0048365//Rac GTPase binding	GO:0007165//signal transduction;GO:0048812//neuron projection morphogenesis;GO:0060996//dendritic spine development;GO:0046847//filopodium assembly;GO:0032855//positive regulation of Rac GTPase activity;GO:0021816//extension of a leading process involved in cell motility in cerebral cortex radial glia guided migration
chrAADN03010432.1	5303	6033	113	49	1.20547	4.08831e-35	ENSGALG00000021087	57326068337302	Intron_up	-	-	-	GO:0016787//hydrolase activity	GO:0008152//metabolic process
chr7	14772379	14772932	124	57	1.12131	9.84145e-35	ENSGALG00000026366	1.47726e+22	Intron_up	-	-	-	GO:0004672//protein kinase activity;GO:0004674//protein serine/threonine kinase activity;GO:0005524//ATP binding;GO:0016772//transferase activity, transferring phosphorus-containing groups;GO:0005089//Rho guanyl-nucleotide exchange factor activity;GO:0005515//protein binding;GO:0003676//nucleic acid binding;GO:0004713//protein tyrosine kinase activity	GO:0006468//protein phosphorylation;GO:0035023//regulation of Rho protein signal transduction
chr3	74508324	74509185	96	38	1.33703	1.09258e-34	ENSGALG00000015596	7.45062e+22	Intron_up	MAP3K7	ko04010//MAPK signaling pathway;ko04310//Wnt signaling pathway;ko05145//Toxoplasmosis;ko05162//Measles;ko04620//Toll-like receptor signaling pathway;ko04660//T cell receptor signaling pathway;ko04380//Osteoclast differentiation;ko04520//Adherens junction;ko04622//RIG-I-like receptor signaling pathway;ko05140//Leishmaniasis;ko04621//NOD-like receptor signaling pathway	GO:0005737//cytoplasm;GO:0005634//nucleus;GO:0005671//Ada2/Gcn5/Ada3 transcription activator complex;GO:0008385//IkappaB kinase complex	GO:0000287//magnesium ion binding;GO:0004672//protein kinase activity;GO:0004674//protein serine/threonine kinase activity;GO:0004709//MAP kinase kinase kinase activity;GO:0005524//ATP binding;GO:0016772//transferase activity, transferring phosphorus-containing groups;GO:0004713//protein tyrosine kinase activity;GO:0005515//protein binding;GO:0097110//scaffold protein binding;GO:0004708//MAP kina…	GO:0006468//protein phosphorylation;GO:0007165//signal transduction;GO:0007252//I-kappaB phosphorylation;GO:0000186//activation of MAPKK activity;GO:0000187//activation of MAPK activity;GO:0043123//positive regulation of I-kappaB kinase/NF-kappaB signaling;GO:0007250//activation of NF-kappaB-inducing kinase activity;GO:0032743//positive regulation of interleukin-2 production;GO:0002726//positive …
chr8	1209735	1210769	129	61	1.08049	2.70588e-34	ENSGALG00000001951	1.20911e+21	Intron_up	-	-	-	-	-
chr6	22094825	22095706	103	43	1.26024	3.71546e-34	ENSGALG00000007658	2.20946e+21	Intron_up	C10orf76	-	-	GO:0005488//binding	-
chr5	48456718	48457664	101	42	1.26589	6.71791e-34	ENSGALG00000011225	4.84569e+22	Intron_up	SLC25A47	-	GO:0016020//membrane;GO:0016021//integral component of membrane;GO:0005739//mitochondrion	-	GO:0006810//transport;GO:0055085//transmembrane transport
chrZ	60430280	60430973	118	54	1.12776	1.58852e-33	ENSGALG00000010896	6.0428e+22	Intron_up	TMEM161B	-	-	-	-
chrZ	22952404	22953288	115	52	1.14505	1.96588e-33	ENSGALG00000004353	2.29455e+23	Intron_up	TBCA	-	GO:0005874//microtubule;GO:0005730//nucleolus;GO:0070062//extracellular vesicular exosome;GO:0015630//microtubule cytoskeleton	GO:0051082//unfolded protein binding	GO:0007021//tubulin complex assembly
chr5	12828789	12829615	96	39	1.29956	2.81583e-33	ENSGALG00000006472	1.26121e+24	Intron_up	KCNQ1	ko04725//Cholinergic synapse;ko04972//Pancreatic secretion;ko04971//Gastric acid secretion;ko05110//Vibrio cholerae infection;ko04974//Protein digestion and absorption	GO:0008076//voltage-gated potassium channel complex;GO:0016020//membrane;GO:0016021//integral component of membrane;GO:0008076//voltage-gated potassium channel complex;GO:0016020//membrane;GO:0016021//integral component of membrane;GO:0005764//lysosome;GO:0005769//early endosome;GO:0016323//basolateral plasma membrane;GO:0005770//late endosome	GO:0005216//ion channel activity;GO:0005249//voltage-gated potassium channel activity;GO:0005251//delayed rectifier potassium channel activity;GO:0005267//potassium channel activity;GO:0005216//ion channel activity;GO:0005249//voltage-gated potassium channel activity;GO:0005267//potassium channel activity;GO:0005515//protein binding;GO:0005516//calmodulin binding;GO:0044325//ion channel binding;G…	GO:0006810//transport;GO:0006811//ion transport;GO:0006813//potassium ion transport;GO:0055085//transmembrane transport;GO:0071805//potassium ion transmembrane transport;GO:0006810//transport;GO:0006811//ion transport;GO:0006813//potassium ion transport;GO:0055085//transmembrane transport;GO:0071805//potassium ion transmembrane transport;GO:0035690//cellular response to drug;GO:0060372//regulatio…
chr7	7322991	7323828	117	54	1.11548	1.04037e-32	ENSGALG00000007527	7.32235e+20	Intron_up	ADARB1	-	GO:0005730//nucleolus;GO:0005634//nucleus	GO:0003723//RNA binding;GO:0004000//adenosine deaminase activity;GO:0005515//protein binding;GO:0003726//double-stranded RNA adenosine deaminase activity;GO:0003725//double-stranded RNA binding	GO:0006396//RNA processing;GO:0008285//negative regulation of cell proliferation;GO:0051726//regulation of cell cycle;GO:0006382//adenosine to inosine editing;GO:0044387//negative regulation of protein kinase activity by regulation of protein phosphorylation;GO:0030336//negative regulation of cell migration;GO:0045070//positive regulation of viral genome replication
chr7	34324126	34324967	131	64	1.03342	1.05317e-32	ENSGALG00000012462	3.43245e+22	Intron_up	KIF5C	-	GO:0005871//kinesin complex;GO:0005874//microtubule	GO:0000166//nucleotide binding;GO:0003777//microtubule motor activity;GO:0005524//ATP binding;GO:0008017//microtubule binding;GO:0005515//protein binding	GO:0007018//microtubule-based movement;GO:0008152//metabolic process;GO:0051028//mRNA transport
chrZ	47515553	47516443	101	43	1.23195	1.46868e-32	ENSGALG00000000276	4.75109e+23	Intron_up	FBXL17	-	-	GO:0005515//protein binding	-
chr9	13485099	13487013	135	67	1.01073	1.56555e-32	ENSGALG00000007303	1.34596e+24	Intron_up	LEPREL1	-	GO:0005794//Golgi apparatus;GO:0005783//endoplasmic reticulum;GO:0005604//basement membrane	GO:0005506//iron ion binding;GO:0016491//oxidoreductase activity;GO:0016705//oxidoreductase activity, acting on paired donors, with incorporation or reduction of molecular oxygen;GO:0016706//oxidoreductase activity, acting on paired donors, with incorporation or reduction of molecular oxygen, 2-oxoglutarate as one donor, and incorporation of one atom each of oxygen into both donors;GO:0031418//L-…	GO:0055114//oxidation-reduction process;GO:0008285//negative regulation of cell proliferation;GO:0019511//peptidyl-proline hydroxylation;GO:0032963//collagen metabolic process
chr3	104488392	104489385	115	53	1.11757	3.22809e-32	ENSGALG00000016531	1.04401e+26	Intron_up	ASXL2	-	GO:0005737//cytoplasm;GO:0045202//synapse;GO:0005737//cytoplasm;GO:0045202//synapse;GO:0005634//nucleus;GO:0000790//nuclear chromatin;GO:0005634//nucleus;GO:0000790//nuclear chromatin	GO:0005509//calcium ion binding;GO:0005509//calcium ion binding;GO:0042975//peroxisome proliferator activated receptor binding;GO:0042975//peroxisome proliferator activated receptor binding;GO:0003677//DNA binding;GO:0003677//DNA binding	GO:0006351//transcription, DNA-templated;GO:0006355//regulation of transcription, DNA-templated;GO:0045944//positive regulation of transcription from RNA polymerase II promoter;GO:0035360//positive regulation of peroxisome proliferator activated receptor signaling pathway;GO:0045600//positive regulation of fat cell differentiation;GO:0000122//negative regulation of transcription from RNA polymera…
chr4	79398968	79399885	119	56	1.08746	3.76141e-32	ENSGALG00000015538	7.93879e+23	Intron_up	KIAA0232	-	-	-	-
chr6	8638554	8639443	119	56	1.08746	3.76141e-32	ENSGALG00000003176	8.63603e+20	Intron_up	-	-	GO:0005622//intracellular	-	GO:0007165//signal transduction
chr3	38270482	38271087	115	54	1.0906	3.1458e-31	ENSGALG00000011013	3.82589e+23	Intron_up	PCNXL2	-	GO:0016021//integral component of membrane	GO:0003824//catalytic activity	-
chr26	3479834	3480663	108	49	1.14018	3.35549e-31	ENSGALG00000001547	3.47976e+19	Intron_up	CAPZA1	-	GO:0008290//F-actin capping protein complex;GO:0071203//WASH complex;GO:0005737//cytoplasm;GO:0005829//cytosol;GO:0030018//Z disc;GO:0070062//extracellular vesicular exosome	GO:0003779//actin binding;GO:0005515//protein binding	GO:0030036//actin cytoskeleton organization;GO:0051693//actin filament capping;GO:0051016//barbed-end actin filament capping
chr5	26185247	26186231	123	60	1.03562	5.56378e-31	ENSGALG00000009368	2.59736e+24	Intron_up	RGS6	-	GO:0005834//heterotrimeric G-protein complex;GO:0005834//heterotrimeric G-protein complex	GO:0004871//signal transducer activity;GO:0004871//signal transducer activity;GO:0005515//protein binding	GO:0007186//G-protein coupled receptor signaling pathway;GO:0035556//intracellular signal transduction;GO:0038032//termination of G-protein coupled receptor signaling pathway;GO:0008277//regulation of G-protein coupled receptor protein signaling pathway;GO:0007186//G-protein coupled receptor signaling pathway;GO:0035556//intracellular signal transduction;GO:0038032//termination of G-protein coupl…
chrZ	80319775	80320630	99	43	1.20309	7.66253e-31	ENSGALG00000018621	8.02212e+24	Intron_up	-	-	GO:0005622//intracellular	-	GO:0007165//signal transduction
chr8	26504298	26505171	96	41	1.22741	8.47485e-31	ENSGALG00000010985	2.65027e+22	Intron_up	ATG4C	ko04140//Regulation of autophagy	GO:0005737//cytoplasm;GO:0005576//extracellular region	GO:0008233//peptidase activity;GO:0008234//cysteine-type peptidase activity;GO:0016787//hydrolase activity;GO:0004197//cysteine-type endopeptidase activity	GO:0006508//proteolysis;GO:0006810//transport;GO:0006914//autophagy;GO:0015031//protein transport;GO:0000045//autophagic vacuole assembly
chrZ	34789485	34790473	124	61	1.02346	1.62118e-30	ENSGALG00000015115	3.47893e+23	Intron_up	MAMDC2	-	GO:0016020//membrane;GO:0005783//endoplasmic reticulum;GO:0031012//extracellular matrix;GO:0005614//interstitial matrix	GO:0005539//glycosaminoglycan binding	GO:0019800//peptide cross-linking via chondroitin 4-sulfate glycosaminoglycan
chr5	38889211	38890110	114	54	1.078	1.9791e-30	ENSGALG00000010518	3.88835e+24	Intron_up	NRXN3	ko04514//Cell adhesion molecules (CAMs)	-	GO:0005515//protein binding;GO:0005246//calcium channel regulator activity	GO:0007268//synaptic transmission;GO:0007269//neurotransmitter secretion;GO:0007416//synapse assembly;GO:0051965//positive regulation of synapse assembly;GO:0090129//positive regulation of synapse maturation;GO:0071625//vocalization behavior;GO:0030534//adult behavior;GO:0007612//learning;GO:0035176//social behavior
chrZ	51750790	51751590	111	52	1.09398	2.63043e-30	ENSGALG00000015311	5.17294e+23	Intron_up	RNF38	-	GO:0005634//nucleus	GO:0008270//zinc ion binding;GO:0046872//metal ion binding;GO:0005515//protein binding;GO:0004842//ubiquitin-protein ligase activity	-
chr7	27695621	27696488	98	43	1.18845	3.90949e-30	ENSGALG00000012061	2.76928e+22	Intron_up	-	ko00564//Glycerophospholipid metabolism	GO:0005737//cytoplasm;GO:0009331//glycerol-3-phosphate dehydrogenase complex	GO:0004367//glycerol-3-phosphate dehydrogenase [NAD+] activity;GO:0016491//oxidoreductase activity;GO:0016616//oxidoreductase activity, acting on the CH-OH group of donors, NAD or NADP as acceptor;GO:0042803//protein homodimerization activity;GO:0050662//coenzyme binding;GO:0051287//NAD binding	GO:0005975//carbohydrate metabolic process;GO:0006072//glycerol-3-phosphate metabolic process;GO:0046168//glycerol-3-phosphate catabolic process;GO:0055114//oxidation-reduction process
chr7	13567343	13568142	112	53	1.07943	6.14784e-30	ENSGALG00000008885	1.35661e+22	Intron_up	PDE1A	ko04020//Calcium signaling pathway;ko00230//Purine metabolism;ko04740//Olfactory transduction;ko04742//Taste transduction	-	GO:0003824//catalytic activity;GO:0004114//3',5'-cyclic-nucleotide phosphodiesterase activity;GO:0008081//phosphoric diester hydrolase activity;GO:0016787//hydrolase activity;GO:0046872//metal ion binding	GO:0007165//signal transduction;GO:0008152//metabolic process
chr9	7569124	7570097	116	56	1.05063	6.58212e-30	ENSGALG00000005206	7.56448e+20	Intron_up	ACSL3	ko01100//Metabolic pathways;ko04146//Peroxisome;ko03320//PPAR signaling pathway;ko04920//Adipocytokine signaling pathway;ko00071//Fatty acid metabolism	GO:0005794//Golgi apparatus;GO:0016020//membrane;GO:0005783//endoplasmic reticulum;GO:0048471//perinuclear region of cytoplasm;GO:0005811//lipid particle	GO:0003824//catalytic activity;GO:0019904//protein domain specific binding;GO:0019901//protein kinase binding;GO:0004467//long-chain fatty acid-CoA ligase activity	GO:0008152//metabolic process;GO:2001247//positive regulation of phosphatidylcholine biosynthetic process;GO:0051047//positive regulation of secretion;GO:0042998//positive regulation of Golgi to plasma membrane protein transport;GO:0034379//very-low-density lipoprotein particle assembly;GO:0044539//long-chain fatty acid import
chr9	15746630	15747447	89	37	1.26628	6.96999e-30	ENSGALG00000008744	1.57441e+22	Intron_up	MCF2L2	-	-	GO:0005085//guanyl-nucleotide exchange factor activity;GO:0005089//Rho guanyl-nucleotide exchange factor activity;GO:0005515//protein binding	GO:0032321//positive regulation of Rho GTPase activity;GO:0035023//regulation of Rho protein signal transduction;GO:0035556//intracellular signal transduction;GO:0043547//positive regulation of GTPase activity
chr3	55512121	55513153	113	54	1.06529	1.22693e-29	ENSGALG00000013980	5.55023e+24	Intron_up	SLC2A12	-	GO:0016020//membrane;GO:0016021//integral component of membrane	GO:0005215//transporter activity;GO:0022857//transmembrane transporter activity;GO:0022891//substrate-specific transmembrane transporter activity	GO:0006810//transport;GO:0055085//transmembrane transport;GO:0015758//glucose transport
chr5	8453761	8454697	113	54	1.06529	1.22693e-29	ENSGALG00000005716	8.43156e+21	Intron_up	SBF2	-	GO:0016020//membrane;GO:0005774//vacuolar membrane	GO:0016791//phosphatase activity;GO:0005515//protein binding;GO:0017112//Rab guanyl-nucleotide exchange factor activity;GO:0042803//protein homodimerization activity;GO:0035091//phosphatidylinositol binding;GO:0019902//phosphatase binding;GO:0019208//phosphatase regulator activity	GO:0016311//dephosphorylation;GO:0032851//positive regulation of Rab GTPase activity;GO:0051262//protein tetramerization
chr14	6678077	6679070	106	49	1.11321	1.44902e-29	ENSGALG00000006014	6.67688e+20	Intron_up	PRKCB	ko05200//Pathways in cancer;ko04010//MAPK signaling pathway;ko04510//Focal adhesion;ko04020//Calcium signaling pathway;ko05164//Influenza A;ko04310//Wnt signaling pathway;ko04062//Chemokine signaling pathway;ko04530//Tight junction;ko04270//Vascular smooth muscle contraction;ko04670//Leukocyte transendothelial migration;ko04916//Melanogenesis;ko04912//GnRH signaling pathway;ko05146//Amoebiasis;ko…	GO:0070062//extracellular vesicular exosome;GO:0005737//cytoplasm;GO:0005886//plasma membrane;GO:0005634//nucleus	GO:0000166//nucleotide binding;GO:0004672//protein kinase activity;GO:0004674//protein serine/threonine kinase activity;GO:0004697//protein kinase C activity;GO:0005524//ATP binding;GO:0008270//zinc ion binding;GO:0016301//kinase activity;GO:0016740//transferase activity;GO:0016772//transferase activity, transferring phosphorus-containing groups;GO:0046872//metal ion binding;GO:0005515//protein b…	GO:0006468//protein phosphorylation;GO:0016310//phosphorylation;GO:0035556//intracellular signal transduction;GO:0006357//regulation of transcription from RNA polymerase II promoter;GO:0035408//histone H3-T6 phosphorylation;GO:0006816//calcium ion transport;GO:0042113//B cell activation;GO:0006874//cellular calcium ion homeostasis;GO:0051092//positive regulation of NF-kappaB transcription factor …
chrZ	63475572	63476478	101	46	1.13465	3.58005e-29	ENSGALG00000023089	6.34759e+22	Intron_up	SSBP2	-	-	GO:0003697//single-stranded DNA binding;GO:0005515//protein binding	-
chrZ	7423941	7424367	115	56	1.03814	3.96193e-29	ENSGALG00000021378	7.42371e+20	Intron_up	UBAP1	-	GO:0005829//cytosol;GO:0005737//cytoplasm;GO:0000813//ESCRT I complex	GO:0005515//protein binding;GO:0043130//ubiquitin binding	GO:0043162//ubiquitin-dependent protein catabolic process via the multivesicular body sorting pathway
chr14	7629036	7630649	98	44	1.15528	4.37867e-29	ENSGALG00000006646	7.62854e+22	Intron_up	ABCC1	ko02010//ABC transporters;ko04977//Vitamin digestion and absorption	GO:0016021//integral component of membrane;GO:0070062//extracellular vesicular exosome;GO:0016020//membrane;GO:0005886//plasma membrane;GO:0005887//integral component of plasma membrane	GO:0000166//nucleotide binding;GO:0005215//transporter activity;GO:0005524//ATP binding;GO:0016887//ATPase activity;GO:0017111//nucleoside-triphosphatase activity;GO:0042626//ATPase activity, coupled to transmembrane movement of substances	GO:0006810//transport;GO:0055085//transmembrane transport
chr4	34134024	34134480	109	52	1.06774	7.62207e-29	ENSGALG00000010281	3.41342e+21	Intron_up	WRN	-	GO:0005622//intracellular;GO:0005813//centrosome;GO:0005730//nucleolus;GO:0005654//nucleoplasm;GO:0032389//MutLalpha complex;GO:0005634//nucleus	GO:0000166//nucleotide binding;GO:0003676//nucleic acid binding;GO:0003824//catalytic activity;GO:0004386//helicase activity;GO:0005524//ATP binding;GO:0008026//ATP-dependent helicase activity;GO:0008408//3'-5' exonuclease activity;GO:0016787//hydrolase activity;GO:0043140//ATP-dependent 3'-5' DNA helicase activity;GO:0003677//DNA binding;GO:0005515//protein binding;GO:0000287//magnesium ion bind…	GO:0006139//nucleobase-containing compound metabolic process;GO:0006260//DNA replication;GO:0006281//DNA repair;GO:0006310//DNA recombination;GO:0044237//cellular metabolic process;GO:0090305//nucleic acid phosphodiester bond hydrolysis;GO:0006974//cellular response to DNA damage stimulus;GO:0042981//regulation of apoptotic process;GO:0006284//base-excision repair;GO:0006302//double-strand break …
chr4	20734759	20735664	117	58	1.01238	1.62236e-28	ENSGALG00000009378	2.07204e+23	Intron_up	PDGFC	ko04810//Regulation of actin cytoskeleton;ko04510//Focal adhesion;ko04060//Cytokine-cytokine receptor interaction;ko05215//Prostate cancer;ko04540//Gap junction;ko05218//Melanoma	GO:0005576//extracellular region;GO:0016020//membrane;GO:0005615//extracellular space;GO:0070062//extracellular vesicular exosome;GO:0005737//cytoplasm;GO:0005886//plasma membrane;GO:0009986//cell surface	GO:0008083//growth factor activity;GO:0005515//protein binding;GO:0042803//protein homodimerization activity;GO:0005161//platelet-derived growth factor receptor binding	GO:0007275//multicellular organismal development;GO:0051781//positive regulation of cell division;GO:0048008//platelet-derived growth factor receptor signaling pathway;GO:0048146//positive regulation of fibroblast proliferation;GO:0045740//positive regulation of DNA replication;GO:0008284//positive regulation of cell proliferation;GO:0071230//cellular response to amino acid stimulus;GO:0009887//o…
chr15	8077478	8078349	113	55	1.03882	1.65526e-28	ENSGALG00000006320	8.07724e+19	Intron_up	-	-	GO:0016020//membrane;GO:0016021//integral component of membrane	GO:0005215//transporter activity;GO:0022857//transmembrane transporter activity;GO:0022891//substrate-specific transmembrane transporter activity	GO:0006810//transport;GO:0055085//transmembrane transport
chr8	28504110	28505068	113	55	1.03882	1.65526e-28	ENSGALG00000011353	2.85042e+22	Intron_up	TNNI3K	-	-	GO:0004672//protein kinase activity;GO:0005524//ATP binding;GO:0016772//transferase activity, transferring phosphorus-containing groups;GO:0005515//protein binding;GO:0004713//protein tyrosine kinase activity	GO:0006468//protein phosphorylation
chr8	18537016	18537747	110	53	1.05344	2.32677e-28	ENSGALG00000009902	1.85369e+21	Intron_up	CFAP57	-	-	GO:0005515//protein binding	-
chr5	6330375	6331216	101	47	1.10362	5.71172e-28	ENSGALG00000012020	6.25107e+22	Intron_up	KIAA1549L	-	GO:0016021//integral component of membrane;GO:0016021//integral component of membrane	GO:0005524//ATP binding;GO:0042626//ATPase activity, coupled to transmembrane movement of substances;GO:0005524//ATP binding;GO:0042626//ATPase activity, coupled to transmembrane movement of substances	GO:0006810//transport;GO:0055085//transmembrane transport;GO:0006810//transport;GO:0055085//transmembrane transport
chr4	73636406	73637142	112	55	1.026	7.28285e-28	ENSGALG00000014398	7.36321e+23	Intron_up	PPARGC1A	ko05016//Huntington's disease;ko04910//Insulin signaling pathway;ko04920//Adipocytokine signaling pathway	GO:0005634//nucleus	GO:0000166//nucleotide binding;GO:0003676//nucleic acid binding;GO:0005515//protein binding;GO:0031625//ubiquitin protein ligase binding;GO:0043565//sequence-specific DNA binding;GO:0030374//ligand-dependent nuclear receptor transcription coactivator activity;GO:0003713//transcription coactivator activity;GO:0016922//ligand-dependent nuclear receptor binding;GO:0003677//DNA binding;GO:0008134//tr…	GO:0006355//regulation of transcription, DNA-templated;GO:1901215//negative regulation of neuron death;GO:0051091//positive regulation of sequence-specific DNA binding transcription factor activity;GO:0045944//positive regulation of transcription from RNA polymerase II promoter;GO:0045893//positive regulation of transcription, DNA-templated;GO:0043524//negative regulation of neuron apoptotic proc…
chr7	20638031	20638966	113	56	1.01282	1.37197e-27	ENSGALG00000011110	2.06376e+22	Intron_up	DPP4	-	GO:0016020//membrane;GO:0070062//extracellular vesicular exosome;GO:0005886//plasma membrane;GO:0009986//cell surface;GO:0005925//focal adhesion;GO:0030027//lamellipodium;GO:0005765//lysosomal membrane;GO:0071438//invadopodium membrane;GO:0016324//apical plasma membrane;GO:0030139//endocytic vesicle;GO:0046581//intercellular canaliculus	GO:0004252//serine-type endopeptidase activity;GO:0008236//serine-type peptidase activity;GO:0042802//identical protein binding;GO:0005515//protein binding;GO:0042803//protein homodimerization activity;GO:0005102//receptor binding;GO:0002020//protease binding;GO:0008239//dipeptidyl-peptidase activity	GO:0006508//proteolysis;GO:0001666//response to hypoxia;GO:0008284//positive regulation of cell proliferation;GO:0042110//T cell activation;GO:0010716//negative regulation of extracellular matrix disassembly;GO:0033632//regulation of cell-cell adhesion mediated by integrin;GO:0043542//endothelial cell migration;GO:0031295//T cell costimulation
chr3	58130109	58131110	99	46	1.10579	1.53526e-27	ENSGALG00000014783	5.81159e+24	Intron_up	PTPRK	-	GO:0016020//membrane;GO:0009986//cell surface;GO:0031256//leading edge membrane;GO:0005911//cell-cell junction;GO:0030425//dendrite;GO:0043025//neuronal cell body;GO:0030424//axon;GO:0001750//photoreceptor outer segment	GO:0004721//phosphoprotein phosphatase activity;GO:0004725//protein tyrosine phosphatase activity;GO:0016787//hydrolase activity;GO:0016791//phosphatase activity;GO:0005515//protein binding;GO:0019901//protein kinase binding;GO:0008013//beta-catenin binding;GO:0045295//gamma-catenin binding	GO:0006470//protein dephosphorylation;GO:0016311//dephosphorylation;GO:0008285//negative regulation of cell proliferation;GO:0045892//negative regulation of transcription, DNA-templated;GO:0007155//cell adhesion;GO:0007165//signal transduction;GO:0048041//focal adhesion assembly;GO:0045786//negative regulation of cell cycle;GO:0007179//transforming growth factor beta receptor signaling pathway;GO…
chr4	89417067	89419033	96	44	1.12553	1.9632e-27	ENSGALG00000016098	8.94025e+24	Intron_up	EXOC6B	-	GO:0000145//exocyst	-	GO:0006904//vesicle docking involved in exocytosis
chr5	13883056	13883640	106	51	1.0555	1.96348e-27	ENSGALG00000006681	1.37095e+24	Intron_up	BRSK2	-	GO:0005813//centrosome;GO:0005737//cytoplasm	GO:0000166//nucleotide binding;GO:0004672//protein kinase activity;GO:0004674//protein serine/threonine kinase activity;GO:0005524//ATP binding;GO:0016772//transferase activity, transferring phosphorus-containing groups;GO:0004713//protein tyrosine kinase activity;GO:0000287//magnesium ion binding;GO:0005515//protein binding;GO:0019901//protein kinase binding;GO:0050321//tau-protein kinase activi…	GO:0006468//protein phosphorylation;GO:0031532//actin cytoskeleton reorganization;GO:0000086//G2/M transition of mitotic cell cycle;GO:0070059//intrinsic apoptotic signaling pathway in response to endoplasmic reticulum stress;GO:0048812//neuron projection morphogenesis;GO:0007409//axonogenesis;GO:0030182//neuron differentiation;GO:0018105//peptidyl-serine phosphorylation;GO:0061178//regulation of…
chr3	61314556	61315347	103	49	1.07179	2.70139e-27	ENSGALG00000014876	6.13138e+23	Intron_up	TBC1D32	-	-	GO:0005097//Rab GTPase activator activity;GO:0005488//binding;GO:0005515//protein binding	GO:0032313//regulation of Rab GTPase activity;GO:0032851//positive regulation of Rab GTPase activity;GO:0007224//smoothened signaling pathway;GO:0043010//camera-type eye development;GO:0002088//lens development in camera-type eye;GO:0060041//retina development in camera-type eye;GO:0021915//neural tube development;GO:0060271//cilium morphogenesis;GO:0042733//embryonic digit morphogenesis;GO:00608…
chr4	53550957	53552224	107	52	1.04103	2.82669e-27	ENSGALG00000011961	5.35446e+23	Intron_up	TNIP3	-	-	GO:0031593//polyubiquitin binding	GO:0034142//toll-like receptor 4 signaling pathway;GO:0071222//cellular response to lipopolysaccharide;GO:0002756//MyD88-independent toll-like receptor signaling pathway;GO:0043124//negative regulation of I-kappaB kinase/NF-kappaB signaling
chr6	6240317	6241128	109	54	1.0133	8.65972e-27	ENSGALG00000002845	6.23183e+22	Intron_up	CTNNA3	ko05200//Pathways in cancer;ko04530//Tight junction;ko04670//Leukocyte transendothelial migration;ko04520//Adherens junction;ko05100//Bacterial invasion of epithelial cells;ko05412//Arrhythmogenic right ventricular cardiomyopathy (ARVC);ko05213//Endometrial cancer	GO:0015629//actin cytoskeleton;GO:0015629//actin cytoskeleton;GO:0005916//fascia adherens;GO:0030027//lamellipodium;GO:0005912//adherens junction	GO:0005198//structural molecule activity;GO:0045296//cadherin binding;GO:0051015//actin filament binding;GO:0005198//structural molecule activity;GO:0045296//cadherin binding;GO:0051015//actin filament binding;GO:0005515//protein binding	GO:0007155//cell adhesion;GO:0007155//cell adhesion;GO:0016337//single organismal cell-cell adhesion
chr7	27272048	27272824	109	54	1.0133	8.65972e-27	ENSGALG00000011744	2.72475e+23	Intron_up	KALRN	-	GO:0070062//extracellular vesicular exosome	GO:0000166//nucleotide binding;GO:0004672//protein kinase activity;GO:0004674//protein serine/threonine kinase activity;GO:0005089//Rho guanyl-nucleotide exchange factor activity;GO:0005524//ATP binding;GO:0016301//kinase activity;GO:0016740//transferase activity;GO:0016772//transferase activity, transferring phosphorus-containing groups;GO:0005515//protein binding;GO:0004713//protein tyrosine ki…	GO:0006468//protein phosphorylation;GO:0016310//phosphorylation;GO:0032321//positive regulation of Rho GTPase activity;GO:0035023//regulation of Rho protein signal transduction
chr9	18417137	18418036	105	51	1.04182	8.77668e-27	ENSGALG00000009131	1.82017e+24	Intron_up	NLGN1	ko04514//Cell adhesion molecules (CAMs)	GO:0016020//membrane;GO:0005887//integral component of plasma membrane;GO:0009897//external side of plasma membrane;GO:0016020//membrane;GO:0016020//membrane;GO:0016020//membrane	GO:0016787//hydrolase activity;GO:0030165//PDZ domain binding;GO:0005515//protein binding;GO:0042043//neurexin family protein binding;GO:0016787//hydrolase activity;GO:0016787//hydrolase activity;GO:0016787//hydrolase activity	GO:0007155//cell adhesion;GO:0008152//metabolic process;GO:0051260//protein homooligomerization;GO:0007157//heterophilic cell-cell adhesion;GO:0002087//regulation of respiratory gaseous exchange by neurological system process;GO:0007416//synapse assembly;GO:0050804//regulation of synaptic transmission;GO:0007399//nervous system development;GO:0097091//synaptic vesicle clustering;GO:0045184//estab…
chrZ	54629199	54630158	106	52	1.02748	1.68066e-26	ENSGALG00000015433	5.45502e+23	Intron_up	ABCA1	ko04975//Fat digestion and absorption;ko02010//ABC transporters	GO:0005887//integral component of plasma membrane;GO:0005886//plasma membrane;GO:0048471//perinuclear region of cytoplasm;GO:0045121//membrane raft;GO:0045335//phagocytic vesicle;GO:0030139//endocytic vesicle;GO:0009897//external side of plasma membrane;GO:0005794//Golgi apparatus;GO:0043231//intracellular membrane-bounded organelle	GO:0000166//nucleotide binding;GO:0005524//ATP binding;GO:0016887//ATPase activity;GO:0017111//nucleoside-triphosphatase activity;GO:0000166//nucleotide binding;GO:0005524//ATP binding;GO:0016887//ATPase activity;GO:0017111//nucleoside-triphosphatase activity;GO:0005515//protein binding;GO:0005102//receptor binding;GO:0017127//cholesterol transporter activity;GO:0019905//syntaxin binding;GO:00341…	GO:0006200//ATP catabolic process;GO:0008152//metabolic process;GO:0006200//ATP catabolic process;GO:0007186//G-protein coupled receptor signaling pathway;GO:0016197//endosomal transport;GO:0043691//reverse cholesterol transport;GO:0008203//cholesterol metabolic process;GO:0042632//cholesterol homeostasis;GO:0007040//lysosome organization;GO:0060155//platelet dense granule organization;GO:0055098…
chrZ	56041625	56042431	99	47	1.07477	2.27523e-26	ENSGALG00000014692	5.60374e+22	Intron_up	LMNB1	-	GO:0005637//nuclear inner membrane;GO:0005638//lamin filament;GO:0005882//intermediate filament;GO:0016020//membrane;GO:0031965//nuclear membrane;GO:0005634//nucleus;GO:0005654//nucleoplasm;GO:0005635//nuclear envelope	GO:0005198//structural molecule activity;GO:0043274//phospholipase binding	-
chr3	45517304	45518241	100	48	1.05889	3.33052e-26	ENSGALG00000012256	4.5514e+22	Intron_up	UTRN	-	GO:0070062//extracellular vesicular exosome;GO:0005737//cytoplasm;GO:0005886//plasma membrane;GO:0005634//nucleus;GO:0031527//filopodium membrane;GO:0030175//filopodium;GO:0043234//protein complex;GO:0070938//contractile ring;GO:0045202//synapse;GO:0016010//dystrophin-associated glycoprotein complex;GO:0031594//neuromuscular junction	GO:0003779//actin binding;GO:0005509//calcium ion binding;GO:0008270//zinc ion binding;GO:0005515//protein binding;GO:0005488//binding;GO:0019901//protein kinase binding;GO:0017166//vinculin binding;GO:0005178//integrin binding	GO:0001954//positive regulation of cell-matrix adhesion
chr4	52983334	52984316	105	52	1.01381	7.33191e-26	ENSGALG00000011834	5.29836e+22	Intron_up	NUDT6	-	-	GO:0016787//hydrolase activity	GO:0008152//metabolic process
chrZ	51866824	51867450	105	52	1.01381	7.33191e-26	ENSGALG00000015326	5.18641e+22	Intron_up	CLTA	ko04144//Endocytosis;ko05016//Huntington's disease;ko04142//Lysosome;ko05100//Bacterial invasion of epithelial cells;ko04961//Endocrine and other factor-regulated calcium reabsorption	GO:0030130//clathrin coat of trans-Golgi network vesicle;GO:0030132//clathrin coat of coated pit;GO:0043231//intracellular membrane-bounded organelle;GO:0016020//membrane;GO:0071439//clathrin complex	GO:0005198//structural molecule activity;GO:0005515//protein binding;GO:0032050//clathrin heavy chain binding	GO:0006886//intracellular protein transport;GO:0016192//vesicle-mediated transport
chrJH375645.1	1890	2463	92	43	1.0973	2.56042e-25	ENSGALG00000029179	22962416121121	Intron_up	-	-	-	GO:0005515//protein binding	-
chr8	15091275	15092299	103	51	1.01408	3.04619e-25	ENSGALG00000006864	1.50869e+23	Intron_up	COL24A1	ko04510//Focal adhesion;ko05146//Amoebiasis;ko04512//ECM-receptor interaction;ko04974//Protein digestion and absorption	GO:0005581//collagen trimer	GO:0005201//extracellular matrix structural constituent	GO:0002244//hematopoietic progenitor cell differentiation
chr14	8771804	8772551	101	50	1.01436	6.21209e-25	ENSGALG00000007070	8.77198e+19	Intron_up	OTOA	-	GO:0016324//apical plasma membrane	-	GO:0007605//sensory perception of sound;GO:0007160//cell-matrix adhesion;GO:0019226//transmission of nerve impulse
chr9	721098	721809	101	50	1.01436	6.21209e-25	ENSGALG00000001696	7.20042e+18	Intron_up	SAG	-	GO:0001750//photoreceptor outer segment;GO:0001917//photoreceptor inner segment	GO:0002046//opsin binding;GO:0051219//phosphoprotein binding	GO:0007165//signal transduction
chr4	35519940	35520765	98	48	1.02975	8.96242e-25	ENSGALG00000010392	3.54963e+24	Intron_up	CCSER1	-	-	-	-
chr4	58062619	58063498	97	48	1.01495	5.26733e-24	ENSGALG00000012216	5.80516e+24	Intron_up	BMPR1B	ko04060//Cytokine-cytokine receptor interaction;ko04350//TGF-beta signaling pathway	GO:0016020//membrane;GO:0016021//integral component of membrane;GO:0044214//fully spanning plasma membrane;GO:0016020//membrane;GO:0016021//integral component of membrane;GO:0044214//fully spanning plasma membrane	GO:0000166//nucleotide binding;GO:0004672//protein kinase activity;GO:0004674//protein serine/threonine kinase activity;GO:0004702//receptor signaling protein serine/threonine kinase activity;GO:0005524//ATP binding;GO:0016301//kinase activity;GO:0016740//transferase activity;GO:0016772//transferase activity, transferring phosphorus-containing groups;GO:0004675//transmembrane receptor protein ser…	GO:0006468//protein phosphorylation;GO:0007178//transmembrane receptor protein serine/threonine kinase signaling pathway;GO:0016310//phosphorylation;GO:0023014//signal transduction by phosphorylation;GO:0002063//chondrocyte development;GO:0006468//protein phosphorylation;GO:0007178//transmembrane receptor protein serine/threonine kinase signaling pathway;GO:0016310//phosphorylation;GO:0023014//si…
chr3	62962225	62962807	94	46	1.03103	7.59694e-24	ENSGALG00000014913	6.29624e+21	Intron_up	ROS1	-	GO:0016020//membrane;GO:0016021//integral component of membrane	GO:0000166//nucleotide binding;GO:0004672//protein kinase activity;GO:0004713//protein tyrosine kinase activity;GO:0004714//transmembrane receptor protein tyrosine kinase activity;GO:0005524//ATP binding;GO:0016301//kinase activity;GO:0016740//transferase activity;GO:0016772//transferase activity, transferring phosphorus-containing groups;GO:0005515//protein binding;GO:0019903//protein phosphatas…	GO:0006468//protein phosphorylation;GO:0007169//transmembrane receptor protein tyrosine kinase signaling pathway;GO:0016310//phosphorylation;GO:0016049//cell growth;GO:0032006//regulation of TOR signaling;GO:0007283//spermatogenesis;GO:0030154//cell differentiation;GO:0010629//negative regulation of gene expression;GO:0008283//cell proliferation;GO:0070372//regulation of ERK1 and ERK2 cascade;GO:…
chr7	11562657	11563538	94	46	1.03103	7.59694e-24	ENSGALG00000008479	1.15598e+22	Intron_up	PLEKHM3	-	-	-	GO:0035556//intracellular signal transduction
chr3	97439930	97441094	88	42	1.06711	2.00706e-23	ENSGALG00000016457	9.74334e+24	Intron_up	TRIB2	-	-	GO:0004672//protein kinase activity;GO:0005524//ATP binding;GO:0016772//transferase activity, transferring phosphorus-containing groups;GO:0004713//protein tyrosine kinase activity;GO:0031625//ubiquitin protein ligase binding;GO:0008134//transcription factor binding;GO:0055106//ubiquitin-protein ligase regulator activity	GO:0006468//protein phosphorylation;GO:0045081//negative regulation of interleukin-10 biosynthetic process;GO:0032436//positive regulation of proteasomal ubiquitin-dependent protein catabolic process;GO:0045599//negative regulation of fat cell differentiation
chrJH376323.1	23044	24361	476	1070	-1.16858	8.02692e-257	ENSGALG00000012102	1.38574e+18	Intron_down	-	-	-	GO:0030246//carbohydrate binding;GO:0030246//carbohydrate binding	-
chr9	15638794	15640491	67	326	-2.28264	1.476e-201	ENSGALG00000008646	1.56393e+21	Intron_down	HRG	-	GO:0070062//extracellular vesicular exosome;GO:0072562//blood microparticle;GO:0031982//vesicle;GO:0061474//phagolysosome membrane;GO:0036019//endolysosome	GO:0004869//cysteine-type endopeptidase inhibitor activity;GO:0008201//heparin binding;GO:0020037//heme binding;GO:0008270//zinc ion binding;GO:0005515//protein binding;GO:0046872//metal ion binding;GO:0005102//receptor binding;GO:0043395//heparan sulfate proteoglycan binding;GO:0019865//immunoglobulin binding;GO:0004867//serine-type endopeptidase inhibitor activity	GO:0010951//negative regulation of endopeptidase activity;GO:0016525//negative regulation of angiogenesis;GO:0030308//negative regulation of cell growth;GO:0010468//regulation of gene expression;GO:0043065//positive regulation of apoptotic process;GO:0008285//negative regulation of cell proliferation;GO:0030193//regulation of blood coagulation;GO:0032956//regulation of actin cytoskeleton organiza…
chr9	5732135	5732805	4	108	-4.75489	2.45042e-117	ENSGALG00000005310	5.69244e+21	Intron_down	CLSTN2	-	GO:0016020//membrane;GO:0016021//integral component of membrane;GO:0045211//postsynaptic membrane	GO:0005509//calcium ion binding	GO:0007156//homophilic cell adhesion
chrAADN03026614.1	403	1543	6	110	-4.1964	8.39275e-113	ENSGALG00000027239	10241246223223	Intron_down	-	-	-	GO:0003779//actin binding;GO:0008017//microtubule binding;GO:0016887//ATPase activity;GO:0005515//protein binding	GO:0006200//ATP catabolic process;GO:0016055//Wnt signaling pathway
chr15	1285874	1286936	10	114	-3.51096	3.70069e-105	ENSGALG00000002076	1.28566e+21	Intron_down	DGCR8	-	GO:0005737//cytoplasm;GO:0005634//nucleus;GO:0015630//microtubule cytoskeleton	GO:0005515//protein binding;GO:0003725//double-stranded RNA binding	GO:0031053//primary miRNA processing;GO:0072091//regulation of stem cell proliferation
chrZ	63921229	63922220	103	281	-1.44793	8.62808e-96	ENSGALG00000015577	6.39181e+22	Intron_down	-	-	-	-	-
chr3	66225029	66225962	31	151	-2.28421	3.45076e-94	ENSGALG00000015070	6.6203e+23	Intron_down	FIG4	-	GO:0010008//endosome membrane	GO:0042578//phosphoric ester hydrolase activity;GO:0005515//protein binding;GO:0042578//phosphoric ester hydrolase activity	GO:0007626//locomotory behavior;GO:0043473//pigmentation;GO:0046488//phosphatidylinositol metabolic process;GO:0048666//neuron development;GO:0031642//negative regulation of myelination;GO:0032288//myelin assembly;GO:0007033//vacuole organization;GO:0008152//metabolic process
chr5	1238564	1239221	16	118	-2.88264	2.21212e-93	ENSGALG00000004414	1.10814e+22	Intron_down	LUZP2	-	-	-	-
chrZ	74402362	74403865	57	190	-1.73697	2.1649e-84	ENSGALG00000027162	7.44025e+23	Intron_down	-	-	GO:0005634//nucleus	GO:0003677//DNA binding;GO:0003700//sequence-specific DNA binding transcription factor activity	GO:0006355//regulation of transcription, DNA-templated
chrJH376399.1	13843	15675	142	323	-1.18564	1.23089e-80	ENSGALG00000013504	1.24041e+17	Intron_down	CHIR-B2	-	-	-	-
chr4	11123405	11124510	21	117	-2.47805	4.82866e-80	ENSGALG00000007466	1.11233e+21	Intron_down	EDNRB2	ko04080//Neuroactive ligand-receptor interaction;ko04020//Calcium signaling pathway;ko04916//Melanogenesis	GO:0016021//integral component of membrane;GO:0016021//integral component of membrane	GO:0004871//signal transducer activity;GO:0004930//G-protein coupled receptor activity;GO:0004962//endothelin receptor activity;GO:0004871//signal transducer activity;GO:0004930//G-protein coupled receptor activity;GO:0004962//endothelin receptor activity	GO:0007165//signal transduction;GO:0007186//G-protein coupled receptor signaling pathway;GO:0008217//regulation of blood pressure;GO:0042310//vasoconstriction;GO:0048484//enteric nervous system development;GO:0086100//endothelin receptor signaling pathway;GO:0007165//signal transduction;GO:0007186//G-protein coupled receptor signaling pathway;GO:0008217//regulation of blood pressure;GO:0042310//v…
chrZ	74406877	74408120	43	159	-1.88662	5.53151e-79	ENSGALG00000027162	7.44074e+22	Intron_down	-	-	GO:0005634//nucleus	GO:0003677//DNA binding;GO:0003700//sequence-specific DNA binding transcription factor activity	GO:0006355//regulation of transcription, DNA-templated
chrJH375171.1	75754	79792	82	226	-1.46263	1.38042e-78	ENSGALG00000028263	7.53913e+19	Intron_down	AUP1	-	GO:0016020//membrane	GO:0005515//protein binding	-
chr8	12917589	12918284	33	136	-2.04307	9.16288e-75	ENSGALG00000005889	1.28983e+23	Intron_down	CCDC18	-	-	-	-
chr3	6903815	6904868	21	112	-2.41504	1.42329e-74	ENSGALG00000009107	6.89126e+22	Intron_down	NRXN1	ko04514//Cell adhesion molecules (CAMs)	GO:0016020//membrane;GO:0016021//integral component of membrane;GO:0009986//cell surface;GO:0042734//presynaptic membrane	GO:0005515//protein binding;GO:0033130//acetylcholine receptor binding;GO:0005246//calcium channel regulator activity;GO:0050839//cell adhesion molecule binding;GO:0097109//neuroligin family protein binding	GO:0042297//vocal learning;GO:0071625//vocalization behavior;GO:0030534//adult behavior;GO:0007612//learning;GO:0035176//social behavior;GO:0007268//synaptic transmission;GO:0050885//neuromuscular process controlling balance;GO:0007416//synapse assembly;GO:0060134//prepulse inhibition;GO:0007269//neurotransmitter secretion;GO:0051965//positive regulation of synapse assembly;GO:0061178//regulation…
chrAADN03027098.1	154057	154645	35	139	-1.98966	7.62267e-74	ENSGALG00000029064	7.56412e+19	Intron_down	-	-	-	-	-
chr3	2984847	2985334	65	190	-1.54749	7.48033e-72	ENSGALG00000008176	2.97074e+21	Intron_down	ASB3	-	-	GO:0005515//protein binding;GO:0005515//protein binding	GO:0016567//protein ubiquitination;GO:0035556//intracellular signal transduction;GO:0016567//protein ubiquitination;GO:0035556//intracellular signal transduction
chr6	34320929	34321659	24	115	-2.26053	2.28837e-71	ENSGALG00000010471	3.43206e+21	Intron_down	PPP2R2D	ko05160//Hepatitis C;ko04530//Tight junction;ko05142//Chagas disease (American trypanosomiasis);ko03015//mRNA surveillance pathway	GO:0000159//protein phosphatase type 2A complex	GO:0008601//protein phosphatase type 2A regulator activity;GO:0005515//protein binding	GO:0007165//signal transduction;GO:0050790//regulation of catalytic activity
chrZ	80277511	80278278	148	318	-1.10343	7.769e-71	ENSGALG00000018621	8.02212e+24	Intron_down	-	-	GO:0005622//intracellular	-	GO:0007165//signal transduction
chrZ	8764080	8765105	47	156	-1.73081	2.60556e-69	ENSGALG00000002326	8.75481e+20	Intron_down	-	-	GO:0016020//membrane;GO:0016021//integral component of membrane;GO:0001669//acrosomal vesicle	GO:0000166//nucleotide binding;GO:0000287//magnesium ion binding;GO:0004012//phospholipid-translocating ATPase activity;GO:0005524//ATP binding;GO:0016787//hydrolase activity;GO:0019829//cation-transporting ATPase activity;GO:0046872//metal ion binding;GO:0005548//phospholipid transporter activity	GO:0006812//cation transport;GO:0008152//metabolic process;GO:0015914//phospholipid transport;GO:0045332//phospholipid translocation;GO:0007030//Golgi organization
chrZ	80469404	80470284	114	262	-1.20053	4.42206e-67	ENSGALG00000022133	8.04697e+21	Intron_down	-	-	GO:0005634//nucleus	GO:0003677//DNA binding;GO:0003700//sequence-specific DNA binding transcription factor activity	GO:0006355//regulation of transcription, DNA-templated
chrZ	80257476	80258579	32	124	-1.9542	8.13575e-65	ENSGALG00000018621	8.02212e+25	Intron_down	-	-	GO:0005622//intracellular	-	GO:0007165//signal transduction
chr4	24413239	24414057	37	133	-1.84583	1.70425e-64	ENSGALG00000009573	2.4413e+22	Intron_down	ANXA10	-	GO:0005739//mitochondrion	GO:0005509//calcium ion binding;GO:0005544//calcium-dependent phospholipid binding	-
chr3	51346649	51347616	28	116	-2.05063	3.76767e-64	ENSGALG00000013737	5.13471e+22	Intron_down	TMEM181	-	-	GO:0015643//toxic substance binding	GO:0009405//pathogenesis
chrZ	76504758	76505468	116	261	-1.16993	4.20911e-64	ENSGALG00000025986	7.6505e+21	Intron_down	-	-	GO:0005634//nucleus	GO:0003677//DNA binding;GO:0003700//sequence-specific DNA binding transcription factor activity	GO:0006355//regulation of transcription, DNA-templated
chr5	25096629	25097650	39	136	-1.80206	6.2948e-64	ENSGALG00000009145	2.50946e+23	Intron_down	-	-	GO:0005871//kinesin complex;GO:0005874//microtubule	GO:0000166//nucleotide binding;GO:0003777//microtubule motor activity;GO:0005524//ATP binding;GO:0008017//microtubule binding;GO:0008289//lipid binding;GO:0005515//protein binding	GO:0007018//microtubule-based movement
chr5	50352727	50354077	60	172	-1.51937	1.14852e-63	ENSGALG00000011528	5.03526e+21	Intron_down	KLC1	-	GO:0005871//kinesin complex;GO:0016020//membrane;GO:0005737//cytoplasm;GO:0031410//cytoplasmic vesicle;GO:0030424//axon;GO:0043005//neuron projection;GO:0035253//ciliary rootlet;GO:0043227//membrane-bounded organelle	GO:0003777//microtubule motor activity;GO:0005515//protein binding	GO:0008152//metabolic process;GO:0008088//axon cargo transport
chr4	33522183	33522911	16	90	-2.49185	1.99582e-62	ENSGALG00000010122	3.35223e+21	Intron_down	SH2D4A	-	GO:0005737//cytoplasm	GO:0005515//protein binding;GO:0019902//phosphatase binding	GO:0010923//negative regulation of phosphatase activity
chrZ	80025152	80025814	25	107	-2.09761	3.92431e-61	ENSGALG00000018621	8.00083e+23	Intron_down	-	-	GO:0005622//intracellular	-	GO:0007165//signal transduction
chr4	67338786	67339506	22	101	-2.19878	5.30973e-61	ENSGALG00000014225	6.72996e+23	Intron_down	KCTD8	-	GO:0043235//receptor complex	GO:0005515//protein binding	GO:0051260//protein homooligomerization;GO:0008277//regulation of G-protein coupled receptor protein signaling pathway
chr6	33546405	33547710	55	160	-1.54057	2.06695e-60	ENSGALG00000010454	3.35336e+24	Intron_down	MGMT	-	GO:0016020//membrane	GO:0003824//catalytic activity;GO:0003908//methylated-DNA-[protein]-cysteine S-methyltransferase activity;GO:0008168//methyltransferase activity	GO:0006281//DNA repair;GO:0032259//methylation;GO:0006974//cellular response to DNA damage stimulus;GO:0043281//regulation of cysteine-type endopeptidase activity involved in apoptotic process;GO:0006307//DNA dealkylation involved in DNA repair
chr6	29542095	29543193	40	134	-1.74416	2.79885e-60	ENSGALG00000009336	2.95425e+21	Intron_down	FAM45A	-	-	-	-
chr3	75277452	75278164	25	105	-2.07039	4.18085e-59	ENSGALG00000015787	7.5275e+22	Intron_down	RNGTT	ko03015//mRNA surveillance pathway	GO:0005634//nucleus	GO:0004484//mRNA guanylyltransferase activity;GO:0004651//polynucleotide 5'-phosphatase activity;GO:0004725//protein tyrosine phosphatase activity;GO:0008138//protein tyrosine/serine/threonine phosphatase activity;GO:0016787//hydrolase activity;GO:0016791//phosphatase activity;GO:0003910//DNA ligase (ATP) activity;GO:0005524//ATP binding;GO:0050355//triphosphatase activity;GO:0008192//RNA guanyly…	GO:0006370//7-methylguanosine mRNA capping;GO:0006397//mRNA processing;GO:0006470//protein dephosphorylation;GO:0016311//dephosphorylation;GO:0035335//peptidyl-tyrosine dephosphorylation;GO:0098507//polynucleotide 5' dephosphorylation;GO:0006281//DNA repair;GO:0006310//DNA recombination;GO:0006396//RNA processing
chr15	6773795	6774552	22	99	-2.16993	6.18795e-59	ENSGALG00000013851	6.75186e+21	Intron_down	-	ko04120//Ubiquitin mediated proteolysis	-	GO:0004842//ubiquitin-protein ligase activity;GO:0016874//ligase activity;GO:0005515//protein binding;GO:0004842//ubiquitin-protein ligase activity;GO:0016874//ligase activity;GO:0005515//protein binding;GO:0004842//ubiquitin-protein ligase activity;GO:0016874//ligase activity;GO:0005515//protein binding	GO:0008152//metabolic process;GO:0016567//protein ubiquitination;GO:0008152//metabolic process;GO:0016567//protein ubiquitination;GO:0008152//metabolic process;GO:0016567//protein ubiquitination
chr7	10742463	10743316	17	89	-2.38827	7.02547e-59	ENSGALG00000020876	1.07425e+21	Intron_down	AOX2P	ko01100//Metabolic pathways;ko00280//Valine, leucine and isoleucine degradation;ko00380//Tryptophan metabolism;ko00350//Tyrosine metabolism;ko00982//Drug metabolism - cytochrome P450;ko00760//Nicotinate and nicotinamide metabolism;ko00750//Vitamin B6 metabolism	GO:0070062//extracellular vesicular exosome	GO:0003824//catalytic activity;GO:0005506//iron ion binding;GO:0008762//UDP-N-acetylmuramate dehydrogenase activity;GO:0009055//electron carrier activity;GO:0016491//oxidoreductase activity;GO:0016614//oxidoreductase activity, acting on CH-OH group of donors;GO:0046872//metal ion binding;GO:0050660//flavin adenine dinucleotide binding;GO:0051287//NAD binding;GO:0051536//iron-sulfur cluster bindin…	GO:0055114//oxidation-reduction process
chr5	37641966	37642846	26	106	-2.02748	3.63399e-58	ENSGALG00000010340	3.76416e+22	Intron_down	TTLL5	-	GO:0005813//centrosome	-	GO:0006464//cellular protein modification process;GO:0006464//cellular protein modification process;GO:0007283//spermatogenesis;GO:0030317//sperm motility;GO:0009566//fertilization;GO:0018095//protein polyglutamylation;GO:0007288//sperm axoneme assembly
chr7	14427740	14428577	23	100	-2.12029	6.25943e-58	ENSGALG00000009012	1.4356e+23	Intron_down	ZNF385B	-	GO:0005634//nucleus	GO:0003676//nucleic acid binding;GO:0008270//zinc ion binding;GO:0046872//metal ion binding;GO:0002039//p53 binding	GO:0072332//intrinsic apoptotic signaling pathway by p53 class mediator
chr3	62970816	62971670	26	105	-2.01381	4.47949e-57	ENSGALG00000014913	6.29697e+22	Intron_down	ROS1	-	GO:0016020//membrane;GO:0016021//integral component of membrane	GO:0000166//nucleotide binding;GO:0004672//protein kinase activity;GO:0004713//protein tyrosine kinase activity;GO:0004714//transmembrane receptor protein tyrosine kinase activity;GO:0005524//ATP binding;GO:0016301//kinase activity;GO:0016740//transferase activity;GO:0016772//transferase activity, transferring phosphorus-containing groups;GO:0005515//protein binding;GO:0019903//protein phosphatas…	GO:0006468//protein phosphorylation;GO:0007169//transmembrane receptor protein tyrosine kinase signaling pathway;GO:0016310//phosphorylation;GO:0016049//cell growth;GO:0032006//regulation of TOR signaling;GO:0007283//spermatogenesis;GO:0030154//cell differentiation;GO:0010629//negative regulation of gene expression;GO:0008283//cell proliferation;GO:0070372//regulation of ERK1 and ERK2 cascade;GO:…
chr5	1128297	1129510	87	206	-1.24356	5.1526e-56	ENSGALG00000004414	1.10814e+23	Intron_down	LUZP2	-	-	-	-
chr4	13604011	13604876	27	105	-1.95936	4.23399e-55	ENSGALG00000008074	1.35809e+23	Intron_down	AMMECR1	-	-	GO:0005515//protein binding	-
chr4	35107372	35108021	26	103	-1.98606	4.38392e-55	ENSGALG00000010392	3.50833e+23	Intron_down	CCSER1	-	-	-	-
chr7	29979841	29980834	37	123	-1.73306	4.60743e-55	ENSGALG00000012207	2.99791e+22	Intron_down	CCNT2	-	GO:0005634//nucleus	GO:0019901//protein kinase binding	GO:0000079//regulation of cyclin-dependent protein serine/threonine kinase activity;GO:0006351//transcription, DNA-templated;GO:0006355//regulation of transcription, DNA-templated
chr4	58050842	58051893	54	152	-1.49304	4.79696e-55	ENSGALG00000012216	5.80106e+23	Intron_down	BMPR1B	ko04060//Cytokine-cytokine receptor interaction;ko04350//TGF-beta signaling pathway	GO:0016020//membrane;GO:0016021//integral component of membrane;GO:0044214//fully spanning plasma membrane;GO:0016020//membrane;GO:0016021//integral component of membrane;GO:0044214//fully spanning plasma membrane	GO:0000166//nucleotide binding;GO:0004672//protein kinase activity;GO:0004674//protein serine/threonine kinase activity;GO:0004702//receptor signaling protein serine/threonine kinase activity;GO:0005524//ATP binding;GO:0016301//kinase activity;GO:0016740//transferase activity;GO:0016772//transferase activity, transferring phosphorus-containing groups;GO:0004675//transmembrane receptor protein ser…	GO:0006468//protein phosphorylation;GO:0007178//transmembrane receptor protein serine/threonine kinase signaling pathway;GO:0016310//phosphorylation;GO:0023014//signal transduction by phosphorylation;GO:0002063//chondrocyte development;GO:0006468//protein phosphorylation;GO:0007178//transmembrane receptor protein serine/threonine kinase signaling pathway;GO:0016310//phosphorylation;GO:0023014//si…
chrZ	80288615	80289530	25	100	-2	3.54174e-54	ENSGALG00000018621	8.02212e+24	Intron_down	-	-	GO:0005622//intracellular	-	GO:0007165//signal transduction
chr7	34167525	34168394	74	182	-1.29834	2.82647e-53	ENSGALG00000012449	3.41663e+22	Intron_down	MBD5	-	GO:0005634//nucleus;GO:0070062//extracellular vesicular exosome;GO:0010369//chromocenter	GO:0003677//DNA binding;GO:0003682//chromatin binding	GO:0007399//nervous system development;GO:0044708//single-organism behavior;GO:0042593//glucose homeostasis;GO:0040014//regulation of multicellular organism growth;GO:0060399//positive regulation of growth hormone receptor signaling pathway
chr10	8213945	8215061	51	145	-1.50748	3.19775e-53	ENSGALG00000004564	8.21383e+19	Intron_down	FAM214A	-	-	-	-
chrZ	80281545	80284988	109	235	-1.10833	5.49643e-53	ENSGALG00000018621	8.02212e+25	Intron_down	-	-	GO:0005622//intracellular	-	GO:0007165//signal transduction
chr9	2154036	2155278	41	127	-1.63113	2.79932e-52	ENSGALG00000002302	2.15456e+20	Intron_down	YEATS2	-	GO:0005634//nucleus;GO:0005671//Ada2/Gcn5/Ada3 transcription activator complex;GO:0072686//mitotic spindle	GO:0005515//protein binding;GO:0017025//TBP-class protein binding	GO:0006355//regulation of transcription, DNA-templated;GO:0000122//negative regulation of transcription from RNA polymerase II promoter;GO:0045892//negative regulation of transcription, DNA-templated;GO:0043966//histone H3 acetylation
chrZ	80015053	80016313	42	128	-1.60768	1.77473e-51	ENSGALG00000018621	8.00083e+24	Intron_down	-	-	GO:0005622//intracellular	-	GO:0007165//signal transduction
chrZ	80273397	80274495	122	251	-1.04081	5.45568e-51	ENSGALG00000018621	8.02212e+25	Intron_down	-	-	GO:0005622//intracellular	-	GO:0007165//signal transduction
chrZ	80061986	80065690	83	193	-1.21742	5.51971e-51	ENSGALG00000018621	8.00083e+24	Intron_down	-	-	GO:0005622//intracellular	-	GO:0007165//signal transduction
chr3	58681367	58682151	28	102	-1.86507	2.3109e-50	ENSGALG00000014828	5.86725e+23	Intron_down	ECHDC1	-	GO:0070062//extracellular vesicular exosome;GO:0005829//cytosol	GO:0003824//catalytic activity;GO:0016831//carboxy-lyase activity	GO:0008152//metabolic process
chr5	23984825	23985784	62	159	-1.35869	6.41132e-50	ENSGALG00000008603	2.39838e+22	Intron_down	IP3KA	ko01100//Metabolic pathways;ko04020//Calcium signaling pathway;ko04070//Phosphatidylinositol signaling system;ko00562//Inositol phosphate metabolism	-	GO:0008440//inositol-1,4,5-trisphosphate 3-kinase activity;GO:0016740//transferase activity	GO:0016310//phosphorylation;GO:0048167//regulation of synaptic plasticity;GO:0006020//inositol metabolic process
chrZ	75490363	75492069	52	141	-1.43911	2.21412e-48	ENSGALG00000021994	7.54908e+21	Intron_down	-	-	GO:0005634//nucleus	GO:0003677//DNA binding;GO:0003700//sequence-specific DNA binding transcription factor activity	GO:0006355//regulation of transcription, DNA-templated
chr3	61281735	61282649	39	119	-1.60942	2.31817e-48	ENSGALG00000014876	6.12817e+21	Intron_down	TBC1D32	-	-	GO:0005097//Rab GTPase activator activity;GO:0005488//binding;GO:0005515//protein binding	GO:0032313//regulation of Rab GTPase activity;GO:0032851//positive regulation of Rab GTPase activity;GO:0007224//smoothened signaling pathway;GO:0043010//camera-type eye development;GO:0002088//lens development in camera-type eye;GO:0060041//retina development in camera-type eye;GO:0021915//neural tube development;GO:0060271//cilium morphogenesis;GO:0042733//embryonic digit morphogenesis;GO:00608…
chr5	23544445	23545851	76	178	-1.22781	9.7409e-48	ENSGALG00000008469	2.354e+23	Intron_down	SPINT1	-	GO:0005615//extracellular space;GO:0070062//extracellular vesicular exosome	GO:0004867//serine-type endopeptidase inhibitor activity;GO:0005515//protein binding	GO:0010951//negative regulation of endopeptidase activity;GO:0030198//extracellular matrix organization;GO:0001892//embryonic placenta development;GO:0060674//placenta blood vessel development;GO:0060670//branching involved in labyrinthine layer morphogenesis
chrZ	57497480	57498316	46	129	-1.48767	8.92737e-47	ENSGALG00000014668	5.74948e+23	Intron_down	MCTP1	-	GO:0016021//integral component of membrane	GO:0005515//protein binding;GO:0005509//calcium ion binding	-
chr3	107054564	107055445	37	114	-1.62344	8.96746e-47	ENSGALG00000016667	1.07054e+24	Intron_down	GAL10	-	GO:0005576//extracellular region	-	GO:0006952//defense response;GO:0042742//defense response to bacterium
chrZ	74400638	74402332	87	193	-1.14951	1.51138e-46	ENSGALG00000027162	7.44022e+21	Intron_down	-	-	GO:0005634//nucleus	GO:0003677//DNA binding;GO:0003700//sequence-specific DNA binding transcription factor activity	GO:0006355//regulation of transcription, DNA-templated
chrZ	33244055	33245214	88	194	-1.14048	2.91349e-46	ENSGALG00000020554	3.32385e+24	Intron_down	ADAMTSL1	-	GO:0005578//proteinaceous extracellular matrix;GO:0031012//extracellular matrix	GO:0004222//metalloendopeptidase activity;GO:0008233//peptidase activity;GO:0008237//metallopeptidase activity;GO:0008270//zinc ion binding;GO:0005515//protein binding	GO:0006508//proteolysis
chr6	26303462	26304568	64	157	-1.29462	6.1256e-46	ENSGALG00000008880	2.62894e+24	Intron_down	VTI1A	ko04130//SNARE interactions in vesicular transport	GO:0016020//membrane;GO:0005794//Golgi apparatus	GO:0005515//protein binding;GO:0005484//SNAP receptor activity	GO:0006886//intracellular protein transport;GO:0016192//vesicle-mediated transport;GO:0042147//retrograde transport, endosome to Golgi
chr3	44070094	44071512	66	160	-1.27753	8.61914e-46	ENSGALG00000011562	4.40037e+24	Intron_down	PARK2	ko04141//Protein processing in endoplasmic reticulum;ko04120//Ubiquitin mediated proteolysis;ko05012//Parkinson's disease	GO:0005739//mitochondrion;GO:0005829//cytosol;GO:0005794//Golgi apparatus;GO:0005737//cytoplasm;GO:0005783//endoplasmic reticulum;GO:0048471//perinuclear region of cytoplasm;GO:0071797//LUBAC complex;GO:0000151//ubiquitin ligase complex;GO:0016235//aggresome;GO:0005634//nucleus;GO:0043234//protein complex;GO:0043005//neuron projection	GO:0004842//ubiquitin-protein ligase activity;GO:0008270//zinc ion binding;GO:0046872//metal ion binding;GO:0005515//protein binding;GO:0019900//kinase binding;GO:0042802//identical protein binding;GO:0031072//heat shock protein binding;GO:0031625//ubiquitin protein ligase binding;GO:0030165//PDZ domain binding;GO:0043130//ubiquitin binding;GO:0019901//protein kinase binding;GO:0051087//chaperone…	GO:0045944//positive regulation of transcription from RNA polymerase II promoter;GO:0016567//protein ubiquitination;GO:0000209//protein polyubiquitination;GO:0044257//cellular protein catabolic process;GO:0070534//protein K63-linked ubiquitination;GO:0001933//negative regulation of protein phosphorylation;GO:0046676//negative regulation of insulin secretion;GO:0043161//proteasome-mediated ubiquit…
chr8	2584661	2585515	59	149	-1.33653	1.00299e-45	ENSGALG00000002305	2.58491e+20	Intron_down	ZBTB41	-	GO:0005634//nucleus	GO:0003676//nucleic acid binding;GO:0046872//metal ion binding;GO:0005515//protein binding	-
chr4	84285508	84286388	45	126	-1.48543	2.20541e-45	ENSGALG00000015718	8.41943e+23	Intron_down	CTBP1	ko05200//Pathways in cancer;ko04310//Wnt signaling pathway;ko05220//Chronic myeloid leukemia;ko04330//Notch signaling pathway	GO:0005634//nucleus;GO:0005667//transcription factor complex;GO:0017053//transcriptional repressor complex	GO:0016616//oxidoreductase activity, acting on the CH-OH group of donors, NAD or NADP as acceptor;GO:0048037//cofactor binding;GO:0051287//NAD binding;GO:0004616//phosphogluconate dehydrogenase (decarboxylating) activity;GO:0005515//protein binding;GO:0019904//protein domain specific binding;GO:0008134//transcription factor binding;GO:0070491//repressing transcription factor binding;GO:0001106//R…	GO:0008152//metabolic process;GO:0055114//oxidation-reduction process;GO:0006098//pentose-phosphate shunt;GO:0000122//negative regulation of transcription from RNA polymerase II promoter;GO:0051726//regulation of cell cycle;GO:0034401//regulation of transcription by chromatin organization;GO:0035067//negative regulation of histone acetylation;GO:0090241//negative regulation of histone H4 acetylat…
chr5	36476734	36478099	26	93	-1.83872	2.48924e-45	ENSGALG00000010137	3.64742e+22	Intron_down	TTC6	-	-	GO:0005515//protein binding	-
chr3	75288087	75290065	59	148	-1.32681	5.24899e-45	ENSGALG00000015787	7.52819e+24	Intron_down	RNGTT	ko03015//mRNA surveillance pathway	GO:0005634//nucleus	GO:0004484//mRNA guanylyltransferase activity;GO:0004651//polynucleotide 5'-phosphatase activity;GO:0004725//protein tyrosine phosphatase activity;GO:0008138//protein tyrosine/serine/threonine phosphatase activity;GO:0016787//hydrolase activity;GO:0016791//phosphatase activity;GO:0003910//DNA ligase (ATP) activity;GO:0005524//ATP binding;GO:0050355//triphosphatase activity;GO:0008192//RNA guanyly…	GO:0006370//7-methylguanosine mRNA capping;GO:0006397//mRNA processing;GO:0006470//protein dephosphorylation;GO:0016311//dephosphorylation;GO:0035335//peptidyl-tyrosine dephosphorylation;GO:0098507//polynucleotide 5' dephosphorylation;GO:0006281//DNA repair;GO:0006310//DNA recombination;GO:0006396//RNA processing
chr6	12975688	12976496	37	112	-1.5979	5.4295e-45	ENSGALG00000004980	1.29293e+24	Intron_down	KCNMA1	ko04270//Vascular smooth muscle contraction;ko04972//Pancreatic secretion;ko04970//Salivary secretion	GO:0016020//membrane;GO:0016021//integral component of membrane;GO:0008076//voltage-gated potassium channel complex;GO:0070062//extracellular vesicular exosome;GO:0005901//caveola;GO:0016324//apical plasma membrane;GO:0016020//membrane;GO:0016021//integral component of membrane;GO:0016020//membrane;GO:0016021//integral component of membrane;GO:0016020//membrane;GO:0016021//integral component of m…	GO:0005216//ion channel activity;GO:0005267//potassium channel activity;GO:0015269//calcium-activated potassium channel activity;GO:0005249//voltage-gated potassium channel activity;GO:0005515//protein binding;GO:0003779//actin binding;GO:0060072//large conductance calcium-activated potassium channel activity;GO:0005216//ion channel activity;GO:0005267//potassium channel activity;GO:0015269//calc…	GO:0006810//transport;GO:0006811//ion transport;GO:0006813//potassium ion transport;GO:0055085//transmembrane transport;GO:0071805//potassium ion transmembrane transport;GO:0001666//response to hypoxia;GO:0043065//positive regulation of apoptotic process;GO:0042391//regulation of membrane potential;GO:0060083//smooth muscle contraction involved in micturition;GO:0060073//micturition;GO:0045794//n…
chr15	8307556	8308372	88	192	-1.12553	7.50863e-45	ENSGALG00000006430	8.30781e+19	Intron_down	MED15	-	GO:0016592//mediator complex;GO:0016020//membrane;GO:0005634//nucleus	GO:0001104//RNA polymerase II transcription cofactor activity;GO:0003779//actin binding;GO:0005515//protein binding	GO:0006357//regulation of transcription from RNA polymerase II promoter;GO:0006366//transcription from RNA polymerase II promoter;GO:0007010//cytoskeleton organization;GO:0019827//stem cell maintenance
chr10	6490513	6491454	36	110	-1.61143	8.15923e-45	ENSGALG00000004212	6.4742e+22	Intron_down	ADAM10	-	GO:0005794//Golgi apparatus;GO:0070062//extracellular vesicular exosome;GO:0016020//membrane;GO:0009986//cell surface;GO:0097197//tetraspanin-enriched microdomain;GO:0005925//focal adhesion;GO:0097038//perinuclear endoplasmic reticulum;GO:0005798//Golgi-associated vesicle;GO:0005634//nucleus;GO:0005737//cytoplasm;GO:0014069//postsynaptic density	GO:0004222//metalloendopeptidase activity;GO:0008237//metallopeptidase activity;GO:0008270//zinc ion binding;GO:0005515//protein binding;GO:0042803//protein homodimerization activity;GO:0019901//protein kinase binding;GO:0004175//endopeptidase activity;GO:0004222//metalloendopeptidase activity;GO:0008237//metallopeptidase activity;GO:0008270//zinc ion binding	GO:0006508//proteolysis;GO:0006509//membrane protein ectodomain proteolysis;GO:0007219//Notch signaling pathway;GO:0008284//positive regulation of cell proliferation;GO:0034612//response to tumor necrosis factor;GO:0030307//positive regulation of cell growth;GO:0030335//positive regulation of cell migration;GO:0051089//constitutive protein ectodomain proteolysis;GO:0051088//PMA-inducible membrane…
chrZ	33556655	33557305	33	104	-1.65605	4.788e-44	ENSGALG00000015083	3.35566e+22	Intron_down	DENND4C	-	GO:0005886//plasma membrane;GO:0005829//cytosol;GO:0030904//retromer complex;GO:0032593//insulin-responsive compartment	GO:0017112//Rab guanyl-nucleotide exchange factor activity	GO:0032851//positive regulation of Rab GTPase activity;GO:0072659//protein localization to plasma membrane;GO:0032869//cellular response to insulin stimulus
chr3	31236667	31237684	67	159	-1.24679	6.35353e-44	ENSGALG00000010554	3.12281e+22	Intron_down	RMDN2	-	GO:0005737//cytoplasm;GO:0005739//mitochondrion	-	-
chr4	67333274	67334211	73	168	-1.20249	1.07572e-43	ENSGALG00000014225	6.72996e+23	Intron_down	KCTD8	-	GO:0043235//receptor complex	GO:0005515//protein binding	GO:0051260//protein homooligomerization;GO:0008277//regulation of G-protein coupled receptor protein signaling pathway
chr4	58093121	58094096	47	127	-1.4341	1.22181e-43	ENSGALG00000012216	5.80516e+24	Intron_down	BMPR1B	ko04060//Cytokine-cytokine receptor interaction;ko04350//TGF-beta signaling pathway	GO:0016020//membrane;GO:0016021//integral component of membrane;GO:0044214//fully spanning plasma membrane;GO:0016020//membrane;GO:0016021//integral component of membrane;GO:0044214//fully spanning plasma membrane	GO:0000166//nucleotide binding;GO:0004672//protein kinase activity;GO:0004674//protein serine/threonine kinase activity;GO:0004702//receptor signaling protein serine/threonine kinase activity;GO:0005524//ATP binding;GO:0016301//kinase activity;GO:0016740//transferase activity;GO:0016772//transferase activity, transferring phosphorus-containing groups;GO:0004675//transmembrane receptor protein ser…	GO:0006468//protein phosphorylation;GO:0007178//transmembrane receptor protein serine/threonine kinase signaling pathway;GO:0016310//phosphorylation;GO:0023014//signal transduction by phosphorylation;GO:0002063//chondrocyte development;GO:0006468//protein phosphorylation;GO:0007178//transmembrane receptor protein serine/threonine kinase signaling pathway;GO:0016310//phosphorylation;GO:0023014//si…
chr3	33550335	33551426	50	131	-1.38957	5.88317e-43	ENSGALG00000010653	3.34067e+25	Intron_down	SMYD3	-	GO:0005634//nucleus	GO:0005515//protein binding;GO:0000979//RNA polymerase II core promoter sequence-specific DNA binding;GO:0018024//histone-lysine N-methyltransferase activity;GO:0000993//RNA polymerase II core binding;GO:0001162//RNA polymerase II intronic transcription regulatory region sequence-specific DNA binding	GO:0045944//positive regulation of transcription from RNA polymerase II promoter;GO:0071549//cellular response to dexamethasone stimulus;GO:0014904//myotube cell development;GO:0006469//negative regulation of protein kinase activity;GO:0033138//positive regulation of peptidyl-serine phosphorylation;GO:0006334//nucleosome assembly;GO:0045184//establishment of protein localization
chr3	41152563	41153619	64	153	-1.25739	7.27533e-43	ENSGALG00000011287	4.11225e+24	Intron_down	-	-	-	GO:0008146//sulfotransferase activity;GO:0008146//sulfotransferase activity	GO:0008152//metabolic process;GO:0008152//metabolic process
chr8	884214	885369	61	148	-1.27872	1.19674e-42	ENSGALG00000001896	8.81021e+20	Intron_down	NTNG1	ko04360//Axon guidance	GO:0005886//plasma membrane;GO:0046658//anchored component of plasma membrane	GO:0005515//protein binding	GO:0007409//axonogenesis
chr28	1678515	1679560	103	209	-1.02086	1.62984e-41	ENSGALG00000001749	1.6454e+22	Intron_down	ACSBG2	ko01100//Metabolic pathways;ko03320//PPAR signaling pathway;ko04920//Adipocytokine signaling pathway;ko00071//Fatty acid metabolism	GO:0005739//mitochondrion;GO:0005737//cytoplasm	GO:0003824//catalytic activity;GO:0003824//catalytic activity;GO:0047617//acyl-CoA hydrolase activity;GO:0004467//long-chain fatty acid-CoA ligase activity	GO:0008152//metabolic process;GO:0008152//metabolic process;GO:0006631//fatty acid metabolic process
chr3	74531318	74532166	30	96	-1.67807	1.71132e-41	ENSGALG00000015596	7.45317e+22	Intron_down	MAP3K7	ko04010//MAPK signaling pathway;ko04310//Wnt signaling pathway;ko05145//Toxoplasmosis;ko05162//Measles;ko04620//Toll-like receptor signaling pathway;ko04660//T cell receptor signaling pathway;ko04380//Osteoclast differentiation;ko04520//Adherens junction;ko04622//RIG-I-like receptor signaling pathway;ko05140//Leishmaniasis;ko04621//NOD-like receptor signaling pathway	GO:0005737//cytoplasm;GO:0005634//nucleus;GO:0005671//Ada2/Gcn5/Ada3 transcription activator complex;GO:0008385//IkappaB kinase complex	GO:0000287//magnesium ion binding;GO:0004672//protein kinase activity;GO:0004674//protein serine/threonine kinase activity;GO:0004709//MAP kinase kinase kinase activity;GO:0005524//ATP binding;GO:0016772//transferase activity, transferring phosphorus-containing groups;GO:0004713//protein tyrosine kinase activity;GO:0005515//protein binding;GO:0097110//scaffold protein binding;GO:0004708//MAP kina…	GO:0006468//protein phosphorylation;GO:0007165//signal transduction;GO:0007252//I-kappaB phosphorylation;GO:0000186//activation of MAPKK activity;GO:0000187//activation of MAPK activity;GO:0043123//positive regulation of I-kappaB kinase/NF-kappaB signaling;GO:0007250//activation of NF-kappaB-inducing kinase activity;GO:0032743//positive regulation of interleukin-2 production;GO:0002726//positive …
chr4	33343307	33344164	32	99	-1.62936	4.26596e-41	ENSGALG00000010105	3.33396e+22	Intron_down	ARFIP1	-	GO:0005829//cytosol;GO:0000139//Golgi membrane;GO:0032588//trans-Golgi network membrane	GO:0019904//protein domain specific binding;GO:0070273//phosphatidylinositol-4-phosphate binding	GO:0006886//intracellular protein transport;GO:0050708//regulation of protein secretion
chrZ	23938353	23939418	76	169	-1.15295	4.31127e-41	ENSGALG00000014945	2.39339e+23	Intron_down	ANKRD31	-	-	GO:0005515//protein binding	-
chr15	3166216	3167042	42	116	-1.46566	4.36056e-41	ENSGALG00000002536	3.16183e+21	Intron_down	STX2	ko04130//SNARE interactions in vesicular transport	GO:0016020//membrane;GO:0016021//integral component of membrane;GO:0070062//extracellular vesicular exosome;GO:0016323//basolateral plasma membrane;GO:0031410//cytoplasmic vesicle;GO:0009986//cell surface;GO:0005911//cell-cell junction;GO:0045121//membrane raft	GO:0005515//protein binding	GO:0007340//acrosome reaction;GO:0016192//vesicle-mediated transport;GO:0030154//cell differentiation;GO:0010468//regulation of gene expression;GO:0030193//regulation of blood coagulation
chr5	26856500	26857664	75	167	-1.15489	8.6632e-41	ENSGALG00000020449	2.68452e+23	Intron_down	COX16	-	GO:0031966//mitochondrial membrane;GO:0005739//mitochondrion	-	-
chr4	64383756	64384884	62	147	-1.24548	1.42304e-40	ENSGALG00000013728	6.43844e+21	Intron_down	PPAT	ko01100//Metabolic pathways;ko00230//Purine metabolism;ko00250//Alanine, aspartate and glutamate metabolism	-	GO:0004044//amidophosphoribosyltransferase activity;GO:0016740//transferase activity;GO:0016757//transferase activity, transferring glycosyl groups;GO:0046872//metal ion binding;GO:0051536//iron-sulfur cluster binding	GO:0006164//purine nucleotide biosynthetic process;GO:0006189//'de novo' IMP biosynthetic process;GO:0008152//metabolic process;GO:0009113//purine nucleobase biosynthetic process;GO:0009116//nucleoside metabolic process
chr7	1101255	1102141	44	118	-1.42321	3.98427e-40	ENSGALG00000002632	1.10051e+20	Intron_down	CALCRL	ko04080//Neuroactive ligand-receptor interaction;ko04270//Vascular smooth muscle contraction	GO:0005886//plasma membrane;GO:0016020//membrane;GO:0016021//integral component of membrane;GO:0005783//endoplasmic reticulum;GO:0005768//endosome;GO:0005764//lysosome	GO:0004871//signal transducer activity;GO:0004888//transmembrane signaling receptor activity;GO:0004930//G-protein coupled receptor activity;GO:0004948//calcitonin receptor activity;GO:0005515//protein binding;GO:0008565//protein transporter activity;GO:0001605//adrenomedullin receptor activity;GO:0001635//calcitonin gene-related polypeptide receptor activity	GO:0007165//signal transduction;GO:0007166//cell surface receptor signaling pathway;GO:0007186//G-protein coupled receptor signaling pathway;GO:0015031//protein transport;GO:0001525//angiogenesis;GO:0006171//cAMP biosynthetic process;GO:0006816//calcium ion transport;GO:0071329//cellular response to sucrose stimulus;GO:0031623//receptor internalization;GO:0030819//positive regulation of cAMP bios…
chr6	30614142	30615214	53	132	-1.31647	6.92571e-40	ENSGALG00000009502	3.05536e+24	Intron_down	ATE1	-	GO:0005737//cytoplasm;GO:0005634//nucleus	GO:0004057//arginyltransferase activity;GO:0016740//transferase activity;GO:0016746//transferase activity, transferring acyl groups;GO:0005515//protein binding;GO:0004057//arginyltransferase activity;GO:0016740//transferase activity;GO:0016746//transferase activity, transferring acyl groups	GO:0016598//protein arginylation;GO:0016598//protein arginylation
chr3	8241270	8242276	52	130	-1.32193	2.12306e-39	ENSGALG00000009034	8.22978e+22	Intron_down	ALK	-	GO:0016020//membrane;GO:0016021//integral component of membrane;GO:0070062//extracellular vesicular exosome;GO:0043234//protein complex	GO:0000166//nucleotide binding;GO:0004672//protein kinase activity;GO:0004713//protein tyrosine kinase activity;GO:0004714//transmembrane receptor protein tyrosine kinase activity;GO:0005524//ATP binding;GO:0016301//kinase activity;GO:0016740//transferase activity;GO:0016772//transferase activity, transferring phosphorus-containing groups;GO:0005515//protein binding	GO:0000187//activation of MAPK activity;GO:0006468//protein phosphorylation;GO:0007165//signal transduction;GO:0007169//transmembrane receptor protein tyrosine kinase signaling pathway;GO:0016310//phosphorylation;GO:0048666//neuron development
chrZ	80023576	80024346	32	97	-1.59991	2.61385e-39	ENSGALG00000018621	8.00083e+23	Intron_down	-	-	GO:0005622//intracellular	-	GO:0007165//signal transduction
chr8	13153420	13154574	40	110	-1.45943	5.9926e-39	ENSGALG00000005959	1.31525e+23	Intron_down	GLMN	-	GO:0031461//cullin-RING ubiquitin ligase complex;GO:0031464//Cul4A-RING E3 ubiquitin ligase complex;GO:0031462//Cul2-RING ubiquitin ligase complex;GO:0031463//Cul3-RING ubiquitin ligase complex	GO:0005515//protein binding;GO:0031625//ubiquitin protein ligase binding;GO:0005171//hepatocyte growth factor receptor binding;GO:0055105//ubiquitin-protein ligase inhibitor activity	GO:0040029//regulation of gene expression, epigenetic;GO:0045086//positive regulation of interleukin-2 biosynthetic process;GO:0050715//positive regulation of cytokine secretion;GO:0032434//regulation of proteasomal ubiquitin-dependent protein catabolic process;GO:0042130//negative regulation of T cell proliferation;GO:0001570//vasculogenesis;GO:0031397//negative regulation of protein ubiquitinat…
chr6	19349254	19349871	34	100	-1.55639	6.97936e-39	ENSGALG00000001789	1.9345e+22	Intron_down	HECTD2	-	-	GO:0004842//ubiquitin-protein ligase activity;GO:0016874//ligase activity	GO:0008152//metabolic process;GO:0016567//protein ubiquitination
chr4	73270986	73271687	55	134	-1.28473	7.08751e-39	ENSGALG00000014391	7.32712e+22	Intron_down	CCDC149	-	-	-	-
chr3	26982114	26983622	79	170	-1.10561	9.65089e-39	ENSGALG00000010043	2.69796e+24	Intron_down	RBKS	ko00030//Pentose phosphate pathway	GO:0070062//extracellular vesicular exosome	GO:0004747//ribokinase activity;GO:0016301//kinase activity;GO:0016740//transferase activity;GO:0016773//phosphotransferase activity, alcohol group as acceptor	GO:0006014//D-ribose metabolic process;GO:0016310//phosphorylation;GO:0046835//carbohydrate phosphorylation
chrZ	44149822	44150343	42	113	-1.42786	1.16932e-38	ENSGALG00000021843	4.40676e+24	Intron_down	AUH	ko01100//Metabolic pathways;ko00280//Valine, leucine and isoleucine degradation	-	GO:0003824//catalytic activity;GO:0004490//methylglutaconyl-CoA hydratase activity;GO:0004300//enoyl-CoA hydratase activity;GO:0003730//mRNA 3'-UTR binding;GO:0003723//RNA binding;GO:0003824//catalytic activity	GO:0008152//metabolic process;GO:0008152//metabolic process
chr3	67029794	67031186	73	161	-1.14109	1.435e-38	ENSGALG00000015308	6.70306e+21	Intron_down	SEC63	ko04141//Protein processing in endoplasmic reticulum;ko03060//Protein export	GO:0005622//intracellular;GO:0016020//membrane	GO:0008565//protein transporter activity;GO:0005488//binding;GO:0005515//protein binding	GO:0031204//posttranslational protein targeting to membrane, translocation;GO:0006614//SRP-dependent cotranslational protein targeting to membrane;GO:0006620//posttranslational protein targeting to membrane;GO:0001889//liver development;GO:0010259//multicellular organismal aging;GO:0072001//renal system development;GO:0006807//nitrogen compound metabolic process
chr20	3370809	3371546	32	96	-1.58496	1.67317e-38	ENSGALG00000003488	3.36526e+21	Intron_down	PTPRT	-	GO:0016020//membrane	GO:0004721//phosphoprotein phosphatase activity;GO:0004725//protein tyrosine phosphatase activity;GO:0016787//hydrolase activity;GO:0016791//phosphatase activity;GO:0005515//protein binding;GO:0008013//beta-catenin binding;GO:0016790//thiolester hydrolase activity;GO:0045294//alpha-catenin binding;GO:0045295//gamma-catenin binding;GO:0045296//cadherin binding;GO:0051393//alpha-actinin binding;GO:…	GO:0006470//protein dephosphorylation;GO:0016311//dephosphorylation;GO:0035335//peptidyl-tyrosine dephosphorylation
chrZ	32771638	32772517	32	96	-1.58496	1.67317e-38	ENSGALG00000015097	3.27717e+22	Intron_down	-	-	-	-	-
chrZ	21118911	21120103	91	187	-1.0391	2.35302e-38	ENSGALG00000014784	2.11175e+22	Intron_down	MAST4	-	-	GO:0000166//nucleotide binding;GO:0000287//magnesium ion binding;GO:0004672//protein kinase activity;GO:0004674//protein serine/threonine kinase activity;GO:0005524//ATP binding;GO:0016301//kinase activity;GO:0016740//transferase activity;GO:0016772//transferase activity, transferring phosphorus-containing groups;GO:0005515//protein binding;GO:0004713//protein tyrosine kinase activity	GO:0006468//protein phosphorylation;GO:0016310//phosphorylation
chr3	33615839	33616847	83	175	-1.07617	4.78485e-38	ENSGALG00000010653	3.36077e+24	Intron_down	SMYD3	-	GO:0005634//nucleus	GO:0005515//protein binding;GO:0000979//RNA polymerase II core promoter sequence-specific DNA binding;GO:0018024//histone-lysine N-methyltransferase activity;GO:0000993//RNA polymerase II core binding;GO:0001162//RNA polymerase II intronic transcription regulatory region sequence-specific DNA binding	GO:0045944//positive regulation of transcription from RNA polymerase II promoter;GO:0071549//cellular response to dexamethasone stimulus;GO:0014904//myotube cell development;GO:0006469//negative regulation of protein kinase activity;GO:0033138//positive regulation of peptidyl-serine phosphorylation;GO:0006334//nucleosome assembly;GO:0045184//establishment of protein localization
chr5	42335212	42336306	61	142	-1.21901	5.75775e-38	ENSGALG00000010607	4.23349e+23	Intron_down	SPATA7	-	-	-	-
chr5	50667620	50668669	61	142	-1.21901	5.75775e-38	ENSGALG00000011581	5.06599e+24	Intron_down	KIF26A	-	GO:0005871//kinesin complex;GO:0005874//microtubule	GO:0000166//nucleotide binding;GO:0003777//microtubule motor activity;GO:0005524//ATP binding;GO:0008017//microtubule binding;GO:0005515//protein binding	GO:0007018//microtubule-based movement;GO:0008152//metabolic process;GO:0009968//negative regulation of signal transduction;GO:0001560//regulation of cell growth by extracellular stimulus;GO:0048484//enteric nervous system development
chr7	20648922	20649827	34	99	-1.54189	6.22537e-38	ENSGALG00000011110	2.06492e+21	Intron_down	DPP4	-	GO:0016020//membrane;GO:0070062//extracellular vesicular exosome;GO:0005886//plasma membrane;GO:0009986//cell surface;GO:0005925//focal adhesion;GO:0030027//lamellipodium;GO:0005765//lysosomal membrane;GO:0071438//invadopodium membrane;GO:0016324//apical plasma membrane;GO:0030139//endocytic vesicle;GO:0046581//intercellular canaliculus	GO:0004252//serine-type endopeptidase activity;GO:0008236//serine-type peptidase activity;GO:0042802//identical protein binding;GO:0005515//protein binding;GO:0042803//protein homodimerization activity;GO:0005102//receptor binding;GO:0002020//protease binding;GO:0008239//dipeptidyl-peptidase activity	GO:0006508//proteolysis;GO:0001666//response to hypoxia;GO:0008284//positive regulation of cell proliferation;GO:0042110//T cell activation;GO:0010716//negative regulation of extracellular matrix disassembly;GO:0033632//regulation of cell-cell adhesion mediated by integrin;GO:0043542//endothelial cell migration;GO:0031295//T cell costimulation
chr5	2419435	2420236	54	131	-1.27854	6.75841e-38	ENSGALG00000003777	2.38711e+21	Intron_down	NELL1	-	-	GO:0005509//calcium ion binding;GO:0005515//protein binding	-
chr10	8267671	8268624	51	126	-1.30485	1.46349e-37	ENSGALG00000004624	8.26391e+21	Intron_down	MYO5A	-	GO:0016459//myosin complex;GO:0070062//extracellular vesicular exosome;GO:0016020//membrane;GO:0005829//cytosol;GO:0005737//cytoplasm;GO:0005783//endoplasmic reticulum;GO:0005777//peroxisome;GO:0031982//vesicle;GO:0001726//ruffle;GO:0005764//lysosome;GO:0005884//actin filament;GO:0055037//recycling endosome;GO:0005769//early endosome;GO:0032433//filopodium tip;GO:0005770//late endosome;GO:0005882…	GO:0000166//nucleotide binding;GO:0003774//motor activity;GO:0005524//ATP binding;GO:0005515//protein binding;GO:0017137//Rab GTPase binding;GO:0005509//calcium ion binding;GO:0003779//actin binding;GO:0005516//calmodulin binding;GO:0000146//microfilament motor activity	GO:0006511//ubiquitin-dependent protein catabolic process;GO:0030050//vesicle transport along actin filament;GO:0006892//post-Golgi vesicle-mediated transport;GO:0016192//vesicle-mediated transport;GO:0072659//protein localization to plasma membrane;GO:0050808//synapse organization;GO:0007268//synaptic transmission;GO:0006887//exocytosis;GO:0006582//melanin metabolic process;GO:0030318//melanocyt…
chr5	34463695	34465004	51	126	-1.30485	1.46349e-37	ENSGALG00000029022	3.4441e+24	Intron_down	NPAS3	-	GO:0005634//nucleus;GO:0005737//cytoplasm	GO:0003677//DNA binding;GO:0004871//signal transducer activity;GO:0046983//protein dimerization activity;GO:0005515//protein binding	GO:0006351//transcription, DNA-templated;GO:0006355//regulation of transcription, DNA-templated;GO:0007165//signal transduction;GO:0007626//locomotory behavior;GO:0001964//startle response;GO:0042711//maternal behavior
chr7	20630276	20630921	41	110	-1.42381	1.6239e-37	ENSGALG00000011104	2.06302e+21	Intron_down	GCG	-	GO:0005576//extracellular region;GO:0005615//extracellular space;GO:0005737//cytoplasm;GO:0005615//extracellular space;GO:0005576//extracellular region;GO:0005615//extracellular space	GO:0005179//hormone activity;GO:0031769//glucagon receptor binding;GO:0042802//identical protein binding;GO:0005515//protein binding;GO:0005179//hormone activity;GO:0031769//glucagon receptor binding	GO:0007188//adenylate cyclase-modulating G-protein coupled receptor signaling pathway;GO:0010737//protein kinase A signaling;GO:0035774//positive regulation of insulin secretion involved in cellular response to glucose stimulus;GO:0042594//response to starvation;GO:0043066//negative regulation of apoptotic process;GO:0043066//negative regulation of apoptotic process;GO:0032092//positive regulatio…
chr4	33661237	33661995	43	113	-1.39391	1.7208e-37	ENSGALG00000010159	3.36571e+22	Intron_down	SLC20A2	-	GO:0016020//membrane;GO:0070062//extracellular vesicular exosome	GO:0005315//inorganic phosphate transmembrane transporter activity	GO:0006817//phosphate ion transport;GO:0055085//transmembrane transport
chr3	107281971	107282925	38	105	-1.46632	2.47718e-37	ENSGALG00000016679	1.0728e+24	Intron_down	PKHD1	-	GO:0005813//centrosome;GO:0070062//extracellular vesicular exosome;GO:0005737//cytoplasm;GO:0072372//primary cilium;GO:0048471//perinuclear region of cytoplasm;GO:0036064//ciliary basal body;GO:0072686//mitotic spindle;GO:0016324//apical plasma membrane	GO:0005515//protein binding	GO:0010824//regulation of centrosome duplication;GO:0032088//negative regulation of NF-kappaB transcription factor activity;GO:0043066//negative regulation of apoptotic process;GO:0008284//positive regulation of cell proliferation;GO:0006874//cellular calcium ion homeostasis;GO:0032006//regulation of TOR signaling;GO:0051898//negative regulation of protein kinase B signaling;GO:0070372//regulatio…
chr3	22948123	22949130	45	116	-1.36613	4.11468e-37	ENSGALG00000009915	2.29375e+24	Intron_down	EML4	-	GO:0016020//membrane;GO:0015630//microtubule cytoskeleton;GO:0072686//mitotic spindle	GO:0005515//protein binding	GO:0007026//negative regulation of microtubule depolymerization
chr8	27169126	27169831	46	117	-1.3468	7.24129e-37	ENSGALG00000011035	2.71678e+22	Intron_down	AK4	ko01100//Metabolic pathways;ko00230//Purine metabolism	GO:0005739//mitochondrion;GO:0005759//mitochondrial matrix;GO:0070062//extracellular vesicular exosome	GO:0004017//adenylate kinase activity;GO:0005524//ATP binding;GO:0016301//kinase activity;GO:0016740//transferase activity;GO:0016776//phosphotransferase activity, phosphate group as acceptor;GO:0019205//nucleobase-containing compound kinase activity;GO:0046899//nucleoside triphosphate adenylate kinase activity;GO:0004550//nucleoside diphosphate kinase activity	GO:0006139//nucleobase-containing compound metabolic process;GO:0006172//ADP biosynthetic process;GO:0016310//phosphorylation;GO:0046033//AMP metabolic process;GO:0046034//ATP metabolic process;GO:0046039//GTP metabolic process;GO:0006165//nucleoside diphosphate phosphorylation;GO:0009142//nucleoside triphosphate biosynthetic process
chr4	76113235	76114166	66	148	-1.16506	7.5317e-37	ENSGALG00000014496	7.6111e+22	Intron_down	PROM1	-	GO:0016021//integral component of membrane;GO:0005615//extracellular space;GO:0070062//extracellular vesicular exosome;GO:0005783//endoplasmic reticulum;GO:0005886//plasma membrane;GO:0009986//cell surface;GO:0031982//vesicle;GO:0042622//photoreceptor outer segment membrane;GO:0005793//endoplasmic reticulum-Golgi intermediate compartment;GO:0005887//integral component of plasma membrane;GO:004299…	GO:0005515//protein binding;GO:0045296//cadherin binding;GO:0042805//actinin binding	GO:0045494//photoreceptor cell maintenance;GO:2000768//positive regulation of nephron tubule epithelial cell differentiation;GO:0072139//glomerular parietal epithelial cell differentiation;GO:0072112//glomerular visceral epithelial cell differentiation;GO:0060042//retina morphogenesis in camera-type eye
chr3	5167588	5168797	73	158	-1.11396	1.58919e-36	ENSGALG00000020092	5.08933e+23	Intron_down	-	-	-	-	-
chr5	9087218	9088206	40	107	-1.41954	2.25441e-36	ENSGALG00000005927	9.0591e+21	Intron_down	ST5	-	-	GO:0017112//Rab guanyl-nucleotide exchange factor activity	GO:0032851//positive regulation of Rab GTPase activity;GO:0070374//positive regulation of ERK1 and ERK2 cascade
chr3	33643330	33644867	78	165	-1.08092	2.62957e-36	ENSGALG00000010653	3.36077e+24	Intron_down	SMYD3	-	GO:0005634//nucleus	GO:0005515//protein binding;GO:0000979//RNA polymerase II core promoter sequence-specific DNA binding;GO:0018024//histone-lysine N-methyltransferase activity;GO:0000993//RNA polymerase II core binding;GO:0001162//RNA polymerase II intronic transcription regulatory region sequence-specific DNA binding	GO:0045944//positive regulation of transcription from RNA polymerase II promoter;GO:0071549//cellular response to dexamethasone stimulus;GO:0014904//myotube cell development;GO:0006469//negative regulation of protein kinase activity;GO:0033138//positive regulation of peptidyl-serine phosphorylation;GO:0006334//nucleosome assembly;GO:0045184//establishment of protein localization
chr3	75434113	75435063	47	118	-1.32805	2.90157e-36	ENSGALG00000015787	7.54064e+23	Intron_down	RNGTT	ko03015//mRNA surveillance pathway	GO:0005634//nucleus	GO:0004484//mRNA guanylyltransferase activity;GO:0004651//polynucleotide 5'-phosphatase activity;GO:0004725//protein tyrosine phosphatase activity;GO:0008138//protein tyrosine/serine/threonine phosphatase activity;GO:0016787//hydrolase activity;GO:0016791//phosphatase activity;GO:0003910//DNA ligase (ATP) activity;GO:0005524//ATP binding;GO:0050355//triphosphatase activity;GO:0008192//RNA guanyly…	GO:0006370//7-methylguanosine mRNA capping;GO:0006397//mRNA processing;GO:0006470//protein dephosphorylation;GO:0016311//dephosphorylation;GO:0035335//peptidyl-tyrosine dephosphorylation;GO:0098507//polynucleotide 5' dephosphorylation;GO:0006281//DNA repair;GO:0006310//DNA recombination;GO:0006396//RNA processing
chr4	8987961	8988987	47	118	-1.32805	2.90157e-36	ENSGALG00000007097	8.98832e+19	Intron_down	RPS6KA6	ko04010//MAPK signaling pathway;ko04722//Neurotrophin signaling pathway;ko04114//Oocyte meiosis;ko04914//Progesterone-mediated oocyte maturation;ko04720//Long-term potentiation;ko04150//mTOR signaling pathway	GO:0016020//membrane	GO:0000166//nucleotide binding;GO:0000287//magnesium ion binding;GO:0004672//protein kinase activity;GO:0004674//protein serine/threonine kinase activity;GO:0005524//ATP binding;GO:0016301//kinase activity;GO:0016740//transferase activity;GO:0016772//transferase activity, transferring phosphorus-containing groups;GO:0016773//phosphotransferase activity, alcohol group as acceptor;GO:0004713//prote…	GO:0006468//protein phosphorylation;GO:0016310//phosphorylation;GO:0035556//intracellular signal transduction;GO:0009103//lipopolysaccharide biosynthetic process;GO:0006978//DNA damage response, signal transduction by p53 class mediator resulting in transcription of p21 class mediator
chr9	10108525	10109716	47	118	-1.32805	2.90157e-36	ENSGALG00000002612	1.01091e+21	Intron_down	U2SURP	ko03040//Spliceosome	GO:0005634//nucleus	GO:0000166//nucleotide binding;GO:0003676//nucleic acid binding;GO:0003723//RNA binding;GO:0005515//protein binding	GO:0006396//RNA processing
chr14	9311617	9312429	92	185	-1.00782	3.1684e-36	ENSGALG00000007278	9.24487e+21	Intron_down	GRIN2A	ko04080//Neuroactive ligand-receptor interaction;ko04020//Calcium signaling pathway;ko05010//Alzheimer's disease;ko04724//Glutamatergic synapse;ko04720//Long-term potentiation;ko05014//Amyotrophic lateral sclerosis (ALS);ko05322//Systemic lupus erythematosus	GO:0005886//plasma membrane;GO:0016020//membrane;GO:0016021//integral component of membrane;GO:0017146//N-methyl-D-aspartate selective glutamate receptor complex;GO:0030054//cell junction;GO:0030425//dendrite;GO:0045202//synapse;GO:0045211//postsynaptic membrane;GO:0017146//N-methyl-D-aspartate selective glutamate receptor complex;GO:0005783//endoplasmic reticulum;GO:0009986//cell surface;GO:0008…	GO:0004872//receptor activity;GO:0004970//ionotropic glutamate receptor activity;GO:0004972//N-methyl-D-aspartate selective glutamate receptor activity;GO:0005215//transporter activity;GO:0005216//ion channel activity;GO:0005234//extracellular-glutamate-gated ion channel activity;GO:0005515//protein binding;GO:0005261//cation channel activity;GO:0005262//calcium channel activity;GO:0004972//N-met…	GO:0006810//transport;GO:0006811//ion transport;GO:0034220//ion transmembrane transport;GO:0035235//ionotropic glutamate receptor signaling pathway;GO:0035249//synaptic transmission, glutamatergic;GO:0045471//response to ethanol;GO:0070588//calcium ion transmembrane transport;GO:0006816//calcium ion transport;GO:0042391//regulation of membrane potential;GO:0043065//positive regulation of apoptoti…
chr9	5809783	5810710	44	113	-1.36075	4.01092e-36	ENSGALG00000005310	5.80901e+21	Intron_down	CLSTN2	-	GO:0016020//membrane;GO:0016021//integral component of membrane;GO:0045211//postsynaptic membrane	GO:0005509//calcium ion binding	GO:0007156//homophilic cell adhesion
chr3	16180523	16181463	42	110	-1.38904	4.02638e-36	ENSGALG00000009155	1.61748e+23	Intron_down	CHGB	-	GO:0030141//secretory granule	GO:0005515//protein binding	-
chr3	6630398	6631319	56	132	-1.23704	4.10764e-36	ENSGALG00000009107	6.52292e+22	Intron_down	NRXN1	ko04514//Cell adhesion molecules (CAMs)	GO:0016020//membrane;GO:0016021//integral component of membrane;GO:0009986//cell surface;GO:0042734//presynaptic membrane	GO:0005515//protein binding;GO:0033130//acetylcholine receptor binding;GO:0005246//calcium channel regulator activity;GO:0050839//cell adhesion molecule binding;GO:0097109//neuroligin family protein binding	GO:0042297//vocal learning;GO:0071625//vocalization behavior;GO:0030534//adult behavior;GO:0007612//learning;GO:0035176//social behavior;GO:0007268//synaptic transmission;GO:0050885//neuromuscular process controlling balance;GO:0007416//synapse assembly;GO:0060134//prepulse inhibition;GO:0007269//neurotransmitter secretion;GO:0051965//positive regulation of synapse assembly;GO:0061178//regulation…
chrZ	60825086	60826340	66	147	-1.15528	4.5726e-36	ENSGALG00000015641	6.08254e+22	Intron_down	CCNH	ko04110//Cell cycle;ko03420//Nucleotide excision repair;ko03022//Basal transcription factors	GO:0016591//DNA-directed RNA polymerase II, holoenzyme;GO:0070985//TFIIK complex;GO:0005634//nucleus;GO:0005675//holo TFIIH complex;GO:0019907//cyclin-dependent protein kinase activating kinase holoenzyme complex	GO:0016538//cyclin-dependent protein serine/threonine kinase regulator activity;GO:0019901//protein kinase binding;GO:0005515//protein binding;GO:0008094//DNA-dependent ATPase activity;GO:0008353//RNA polymerase II carboxy-terminal domain kinase activity;GO:0016301//kinase activity	GO:0000079//regulation of cyclin-dependent protein serine/threonine kinase activity;GO:0006351//transcription, DNA-templated;GO:0006355//regulation of transcription, DNA-templated;GO:0051726//regulation of cell cycle;GO:0006366//transcription from RNA polymerase II promoter;GO:0045944//positive regulation of transcription from RNA polymerase II promoter;GO:0006200//ATP catabolic process;GO:000646…
chrZ	32905906	32907116	71	154	-1.11704	6.58479e-36	ENSGALG00000015096	3.29039e+23	Intron_down	SH3GL2	ko04144//Endocytosis	GO:0005737//cytoplasm;GO:0016020//membrane;GO:0070062//extracellular vesicular exosome	GO:0008289//lipid binding;GO:0005515//protein binding;GO:0042802//identical protein binding	GO:0006897//endocytosis;GO:0048488//synaptic vesicle endocytosis;GO:0002090//regulation of receptor internalization
chr5	53469758	53471266	41	108	-1.39734	7.1577e-36	ENSGALG00000011858	5.34648e+24	Intron_down	KCNH5	-	GO:0005887//integral component of plasma membrane;GO:0016020//membrane;GO:0016021//integral component of membrane;GO:0005622//intracellular;GO:0009986//cell surface	GO:0000155//phosphorelay sensor kinase activity;GO:0004871//signal transducer activity;GO:0005216//ion channel activity;GO:0005249//voltage-gated potassium channel activity	GO:0000160//phosphorelay signal transduction system;GO:0006810//transport;GO:0006811//ion transport;GO:0006813//potassium ion transport;GO:0007165//signal transduction;GO:0023014//signal transduction by phosphorylation;GO:0042391//regulation of membrane potential;GO:0055085//transmembrane transport;GO:0071805//potassium ion transmembrane transport;GO:0071805//potassium ion transmembrane transport…
chr3	35406162	35407115	43	111	-1.36815	7.24779e-36	ENSGALG00000010772	3.54002e+23	Intron_down	RGS7	-	GO:0005834//heterotrimeric G-protein complex;GO:0005634//nucleus;GO:0005886//plasma membrane;GO:0044292//dendrite terminus;GO:0005834//heterotrimeric G-protein complex	GO:0004871//signal transducer activity;GO:0031681//G-protein beta-subunit binding;GO:0005515//protein binding;GO:0004871//signal transducer activity	GO:0007186//G-protein coupled receptor signaling pathway;GO:0035556//intracellular signal transduction;GO:0038032//termination of G-protein coupled receptor signaling pathway;GO:0008277//regulation of G-protein coupled receptor protein signaling pathway;GO:0007186//G-protein coupled receptor signaling pathway;GO:0035556//intracellular signal transduction;GO:0038032//termination of G-protein coupl…
chr4	30369025	30369902	50	122	-1.28688	9.88767e-36	ENSGALG00000009948	3.03636e+22	Intron_down	HHIP	ko05200//Pathways in cancer;ko05217//Basal cell carcinoma;ko04340//Hedgehog signaling pathway	GO:0005887//integral component of plasma membrane;GO:0009986//cell surface	GO:0003824//catalytic activity;GO:0016901//oxidoreductase activity, acting on the CH-OH group of donors, quinone or similar compound as acceptor;GO:0048038//quinone binding;GO:0005515//protein binding;GO:0008270//zinc ion binding;GO:0097108//hedgehog family protein binding	GO:0005975//carbohydrate metabolic process;GO:0055114//oxidation-reduction process;GO:0009968//negative regulation of signal transduction;GO:0007224//smoothened signaling pathway;GO:0009953//dorsal/ventral pattern formation;GO:0007165//signal transduction;GO:0009887//organ morphogenesis;GO:0048705//skeletal system morphogenesis;GO:0007405//neuroblast proliferation;GO:0045879//negative regulation …
chr19	6693123	6694075	84	173	-1.04231	1.10644e-35	ENSGALG00000004660	6.69357e+19	Intron_down	TRPV3	-	GO:0016021//integral component of membrane;GO:0043235//receptor complex;GO:0016020//membrane	GO:0005216//ion channel activity;GO:0005515//protein binding;GO:0005261//cation channel activity	GO:0006811//ion transport;GO:0009266//response to temperature stimulus;GO:0034220//ion transmembrane transport;GO:0042636//negative regulation of hair cycle
chrZ	45719742	45720638	91	183	-1.00791	1.25569e-35	ENSGALG00000000208	4.57202e+22	Intron_down	MCC	-	GO:0005737//cytoplasm;GO:0005886//plasma membrane;GO:0005634//nucleus	GO:0005509//calcium ion binding;GO:0000166//nucleotide binding;GO:0005515//protein binding	GO:0090090//negative regulation of canonical Wnt signaling pathway;GO:0010633//negative regulation of epithelial cell migration;GO:0050680//negative regulation of epithelial cell proliferation
chr7	3902203	3903250	47	117	-1.31578	1.51116e-35	ENSGALG00000003148	3.80441e+23	Intron_down	SPAG16	-	GO:0005634//nucleus;GO:0005737//cytoplasm;GO:0005930//axoneme;GO:0015630//microtubule cytoskeleton	GO:0005515//protein binding;GO:0019901//protein kinase binding	GO:0007283//spermatogenesis;GO:0042384//cilium assembly
chr6	24221293	24222399	60	137	-1.19114	1.59948e-35	ENSGALG00000008434	2.42189e+22	Intron_down	SORCS3	-	GO:0016020//membrane;GO:0016021//integral component of membrane;GO:0097481//neuronal postsynaptic density	GO:0005515//protein binding	GO:0007612//learning;GO:0007613//memory;GO:1900452//regulation of long term synaptic depression
chr4	66289431	66290262	64	143	-1.15987	1.8433e-35	ENSGALG00000014144	6.62893e+23	Intron_down	CORIN	-	GO:0016020//membrane;GO:0005887//integral component of plasma membrane;GO:0009986//cell surface	GO:0003824//catalytic activity;GO:0004252//serine-type endopeptidase activity;GO:0005515//protein binding	GO:0006508//proteolysis;GO:0016486//peptide hormone processing;GO:0008217//regulation of blood pressure;GO:0003050//regulation of systemic arterial blood pressure by atrial natriuretic peptide;GO:0035813//regulation of renal sodium excretion
chr5	5265349	5266471	62	140	-1.17509	2.52479e-35	ENSGALG00000012121	5.25717e+22	Intron_down	RCN1	-	GO:0005783//endoplasmic reticulum	GO:0005509//calcium ion binding;GO:0005515//protein binding	GO:0043010//camera-type eye development
chr9	18321439	18322340	71	153	-1.10764	3.79041e-35	ENSGALG00000009131	1.82017e+24	Intron_down	NLGN1	ko04514//Cell adhesion molecules (CAMs)	GO:0016020//membrane;GO:0005887//integral component of plasma membrane;GO:0009897//external side of plasma membrane;GO:0016020//membrane;GO:0016020//membrane;GO:0016020//membrane	GO:0016787//hydrolase activity;GO:0030165//PDZ domain binding;GO:0005515//protein binding;GO:0042043//neurexin family protein binding;GO:0016787//hydrolase activity;GO:0016787//hydrolase activity;GO:0016787//hydrolase activity	GO:0007155//cell adhesion;GO:0008152//metabolic process;GO:0051260//protein homooligomerization;GO:0007157//heterophilic cell-cell adhesion;GO:0002087//regulation of respiratory gaseous exchange by neurological system process;GO:0007416//synapse assembly;GO:0050804//regulation of synaptic transmission;GO:0007399//nervous system development;GO:0097091//synaptic vesicle clustering;GO:0045184//estab…
chr4	74474765	74475753	69	150	-1.12029	4.13903e-35	ENSGALG00000014405	7.44373e+23	Intron_down	KCNIP4	-	GO:0005578//proteinaceous extracellular matrix;GO:0005578//proteinaceous extracellular matrix	GO:0005509//calcium ion binding;GO:0046872//metal ion binding;GO:0005509//calcium ion binding;GO:0046872//metal ion binding	GO:0007165//signal transduction;GO:0007165//signal transduction
chr6	8972130	8972867	48	118	-1.29768	5.75183e-35	ENSGALG00000003612	8.96358e+21	Intron_down	RNLS	-	-	GO:0016491//oxidoreductase activity	GO:0042414//epinephrine metabolic process;GO:0042415//norepinephrine metabolic process;GO:0042417//dopamine metabolic process;GO:0003073//regulation of systemic arterial blood pressure;GO:0003214//cardiac left ventricle morphogenesis;GO:0055062//phosphate ion homeostasis;GO:0060047//heart contraction;GO:0071873//response to norepinephrine
chr4	85729281	85730600	54	127	-1.2338	7.48678e-35	ENSGALG00000015961	8.57294e+21	Intron_down	SUCLG1	ko01100//Metabolic pathways;ko00640//Propanoate metabolism;ko00020//Citrate cycle (TCA cycle)	GO:0070062//extracellular vesicular exosome;GO:0005739//mitochondrion;GO:0005743//mitochondrial inner membrane	GO:0003824//catalytic activity;GO:0003878//ATP citrate synthase activity;GO:0004775//succinate-CoA ligase (ADP-forming) activity;GO:0016874//ligase activity;GO:0048037//cofactor binding	GO:0008152//metabolic process
chr5	12477693	12479080	85	173	-1.02524	7.50941e-35	ENSGALG00000006427	1.24732e+23	Intron_down	CARS	ko00970//Aminoacyl-tRNA biosynthesis	GO:0005829//cytosol;GO:0005737//cytoplasm;GO:0005737//cytoplasm	GO:0000166//nucleotide binding;GO:0004812//aminoacyl-tRNA ligase activity;GO:0004817//cysteine-tRNA ligase activity;GO:0005524//ATP binding;GO:0005515//protein binding;GO:0042803//protein homodimerization activity;GO:0000049//tRNA binding;GO:0000166//nucleotide binding;GO:0004812//aminoacyl-tRNA ligase activity;GO:0004817//cysteine-tRNA ligase activity;GO:0005524//ATP binding;GO:0000049//tRNA bin…	GO:0006418//tRNA aminoacylation for protein translation;GO:0006423//cysteinyl-tRNA aminoacylation;GO:0006418//tRNA aminoacylation for protein translation;GO:0006423//cysteinyl-tRNA aminoacylation;GO:0006412//translation
chr5	1958799	1959738	47	116	-1.30339	1.08137e-34	ENSGALG00000003999	1.95387e+21	Intron_down	NAV2	-	GO:0005634//nucleus;GO:0031012//extracellular matrix;GO:0005614//interstitial matrix	GO:0000166//nucleotide binding;GO:0005524//ATP binding;GO:0017111//nucleoside-triphosphatase activity;GO:0005515//protein binding;GO:0008201//heparin binding	GO:0008152//metabolic process;GO:0007626//locomotory behavior;GO:0007608//sensory perception of smell;GO:0007605//sensory perception of sound;GO:0003025//regulation of systemic arterial blood pressure by baroreceptor feedback;GO:0021554//optic nerve development;GO:0021563//glossopharyngeal nerve development;GO:0021564//vagus nerve development
chr7	4362742	4363444	44	111	-1.33498	1.58791e-34	ENSGALG00000003578	4.3335e+21	Intron_down	FN1	ko05200//Pathways in cancer;ko04810//Regulation of actin cytoskeleton;ko04510//Focal adhesion;ko05146//Amoebiasis;ko05222//Small cell lung cancer;ko04512//ECM-receptor interaction;ko05100//Bacterial invasion of epithelial cells	GO:0005576//extracellular region;GO:0031012//extracellular matrix;GO:0005615//extracellular space;GO:0070062//extracellular vesicular exosome;GO:0072562//blood microparticle;GO:0005577//fibrinogen complex;GO:0005793//endoplasmic reticulum-Golgi intermediate compartment;GO:0005604//basement membrane;GO:0016324//apical plasma membrane;GO:0005605//basal lamina;GO:0005576//extracellular region	GO:0005515//protein binding;GO:0002020//protease binding;GO:0005178//integrin binding;GO:0016504//peptidase activator activity;GO:0005515//protein binding	GO:0018149//peptide cross-linking;GO:0035987//endodermal cell differentiation;GO:0034446//substrate adhesion-dependent cell spreading;GO:0033622//integrin activation;GO:0045773//positive regulation of axon extension;GO:0042060//wound healing;GO:0007155//cell adhesion;GO:0007160//cell-matrix adhesion;GO:0007044//cell-substrate junction assembly;GO:0010952//positive regulation of peptidase activity…
chr3	6818019	6818913	42	108	-1.36257	1.66551e-34	ENSGALG00000009107	6.76118e+22	Intron_down	NRXN1	ko04514//Cell adhesion molecules (CAMs)	GO:0016020//membrane;GO:0016021//integral component of membrane;GO:0009986//cell surface;GO:0042734//presynaptic membrane	GO:0005515//protein binding;GO:0033130//acetylcholine receptor binding;GO:0005246//calcium channel regulator activity;GO:0050839//cell adhesion molecule binding;GO:0097109//neuroligin family protein binding	GO:0042297//vocal learning;GO:0071625//vocalization behavior;GO:0030534//adult behavior;GO:0007612//learning;GO:0035176//social behavior;GO:0007268//synaptic transmission;GO:0050885//neuromuscular process controlling balance;GO:0007416//synapse assembly;GO:0060134//prepulse inhibition;GO:0007269//neurotransmitter secretion;GO:0051965//positive regulation of synapse assembly;GO:0061178//regulation…
chr5	34733727	34734800	77	161	-1.06413	1.82312e-34	ENSGALG00000029022	3.46528e+25	Intron_down	NPAS3	-	GO:0005634//nucleus;GO:0005737//cytoplasm	GO:0003677//DNA binding;GO:0004871//signal transducer activity;GO:0046983//protein dimerization activity;GO:0005515//protein binding	GO:0006351//transcription, DNA-templated;GO:0006355//regulation of transcription, DNA-templated;GO:0007165//signal transduction;GO:0007626//locomotory behavior;GO:0001964//startle response;GO:0042711//maternal behavior
chr5	8535318	8536481	36	98	-1.44478	1.97586e-34	ENSGALG00000005716	8.52391e+21	Intron_down	SBF2	-	GO:0016020//membrane;GO:0005774//vacuolar membrane	GO:0016791//phosphatase activity;GO:0005515//protein binding;GO:0017112//Rab guanyl-nucleotide exchange factor activity;GO:0042803//protein homodimerization activity;GO:0035091//phosphatidylinositol binding;GO:0019902//phosphatase binding;GO:0019208//phosphatase regulator activity	GO:0016311//dephosphorylation;GO:0032851//positive regulation of Rab GTPase activity;GO:0051262//protein tetramerization
chr10	6472496	6473659	76	159	-1.06496	3.76385e-34	ENSGALG00000004212	6.47284e+19	Intron_down	ADAM10	-	GO:0005794//Golgi apparatus;GO:0070062//extracellular vesicular exosome;GO:0016020//membrane;GO:0009986//cell surface;GO:0097197//tetraspanin-enriched microdomain;GO:0005925//focal adhesion;GO:0097038//perinuclear endoplasmic reticulum;GO:0005798//Golgi-associated vesicle;GO:0005634//nucleus;GO:0005737//cytoplasm;GO:0014069//postsynaptic density	GO:0004222//metalloendopeptidase activity;GO:0008237//metallopeptidase activity;GO:0008270//zinc ion binding;GO:0005515//protein binding;GO:0042803//protein homodimerization activity;GO:0019901//protein kinase binding;GO:0004175//endopeptidase activity;GO:0004222//metalloendopeptidase activity;GO:0008237//metallopeptidase activity;GO:0008270//zinc ion binding	GO:0006508//proteolysis;GO:0006509//membrane protein ectodomain proteolysis;GO:0007219//Notch signaling pathway;GO:0008284//positive regulation of cell proliferation;GO:0034612//response to tumor necrosis factor;GO:0030307//positive regulation of cell growth;GO:0030335//positive regulation of cell migration;GO:0051089//constitutive protein ectodomain proteolysis;GO:0051088//PMA-inducible membrane…
chr3	66246197	66247516	72	153	-1.08746	4.43066e-34	ENSGALG00000015070	6.6203e+24	Intron_down	FIG4	-	GO:0010008//endosome membrane	GO:0042578//phosphoric ester hydrolase activity;GO:0005515//protein binding;GO:0042578//phosphoric ester hydrolase activity	GO:0007626//locomotory behavior;GO:0043473//pigmentation;GO:0046488//phosphatidylinositol metabolic process;GO:0048666//neuron development;GO:0031642//negative regulation of myelination;GO:0032288//myelin assembly;GO:0007033//vacuole organization;GO:0008152//metabolic process
chr3	109671457	109672702	38	101	-1.41028	5.26323e-34	ENSGALG00000016720	1.09671e+25	Intron_down	CD2AP	-	GO:0070062//extracellular vesicular exosome;GO:0001726//ruffle;GO:0031941//filamentous actin;GO:0005737//cytoplasm;GO:0005886//plasma membrane;GO:0005911//cell-cell junction	GO:0005515//protein binding;GO:0005515//protein binding;GO:0017124//SH3 domain binding	GO:1900182//positive regulation of protein localization to nucleus;GO:2000249//regulation of actin cytoskeleton reorganization;GO:0032911//negative regulation of transforming growth factor beta1 production
chrZ	27408624	27409935	77	160	-1.05514	7.4167e-34	ENSGALG00000015027	2.73919e+24	Intron_down	JAK2	ko05164//Influenza A;ko04630//Jak-STAT signaling pathway;ko04062//Chemokine signaling pathway;ko05152//Tuberculosis;ko05145//Toxoplasmosis;ko05162//Measles;ko04725//Cholinergic synapse;ko04920//Adipocytokine signaling pathway;ko05140//Leishmaniasis	GO:0005856//cytoskeleton;GO:0016020//membrane;GO:0005856//cytoskeleton;GO:0016020//membrane;GO:0005737//cytoplasm;GO:0005634//nucleus;GO:0045121//membrane raft;GO:0005901//caveola	GO:0000166//nucleotide binding;GO:0004672//protein kinase activity;GO:0004713//protein tyrosine kinase activity;GO:0004715//non-membrane spanning protein tyrosine kinase activity;GO:0005524//ATP binding;GO:0016301//kinase activity;GO:0016740//transferase activity;GO:0016772//transferase activity, transferring phosphorus-containing groups;GO:0042393//histone binding;GO:0000166//nucleotide binding;…	GO:0006468//protein phosphorylation;GO:0016310//phosphorylation;GO:0018108//peptidyl-tyrosine phosphorylation;GO:0035556//intracellular signal transduction;GO:0006468//protein phosphorylation;GO:0016310//phosphorylation;GO:0035556//intracellular signal transduction;GO:0033209//tumor necrosis factor-mediated signaling pathway;GO:0034612//response to tumor necrosis factor;GO:0070671//response to in…
chr3	33557810	33558642	80	164	-1.03562	1.20058e-33	ENSGALG00000010653	3.34067e+24	Intron_down	SMYD3	-	GO:0005634//nucleus	GO:0005515//protein binding;GO:0000979//RNA polymerase II core promoter sequence-specific DNA binding;GO:0018024//histone-lysine N-methyltransferase activity;GO:0000993//RNA polymerase II core binding;GO:0001162//RNA polymerase II intronic transcription regulatory region sequence-specific DNA binding	GO:0045944//positive regulation of transcription from RNA polymerase II promoter;GO:0071549//cellular response to dexamethasone stimulus;GO:0014904//myotube cell development;GO:0006469//negative regulation of protein kinase activity;GO:0033138//positive regulation of peptidyl-serine phosphorylation;GO:0006334//nucleosome assembly;GO:0045184//establishment of protein localization
chr4	73820822	73821550	42	107	-1.34915	1.2438e-33	ENSGALG00000014401	7.38208e+22	Intron_down	-	-	-	-	-
chr3	80256012	80257100	74	155	-1.06667	1.60251e-33	ENSGALG00000015908	8.02564e+22	Intron_down	COL12A1	-	GO:0005581//collagen trimer;GO:0031012//extracellular matrix;GO:0005615//extracellular space;GO:0070062//extracellular vesicular exosome;GO:0031982//vesicle	GO:0005515//protein binding	GO:0035987//endodermal cell differentiation
chr4	20920870	20921924	74	155	-1.06667	1.60251e-33	ENSGALG00000009405	2.09201e+23	Intron_down	GRIA2	ko04080//Neuroactive ligand-receptor interaction;ko04724//Glutamatergic synapse;ko04730//Long-term depression;ko04720//Long-term potentiation;ko05014//Amyotrophic lateral sclerosis (ALS)	GO:0005886//plasma membrane;GO:0016020//membrane;GO:0016021//integral component of membrane;GO:0030054//cell junction;GO:0045202//synapse;GO:0045211//postsynaptic membrane;GO:0005783//endoplasmic reticulum;GO:0008021//synaptic vesicle;GO:0032281//alpha-amino-3-hydroxy-5-methyl-4-isoxazolepropionic acid selective glutamate receptor complex;GO:0005886//plasma membrane;GO:0016020//membrane;GO:001602…	GO:0004872//receptor activity;GO:0004970//ionotropic glutamate receptor activity;GO:0005216//ion channel activity;GO:0005234//extracellular-glutamate-gated ion channel activity;GO:0005215//transporter activity;GO:0005515//protein binding;GO:0004872//receptor activity;GO:0004970//ionotropic glutamate receptor activity;GO:0004971//alpha-amino-3-hydroxy-5-methyl-4-isoxazole propionate selective glut…	GO:0006810//transport;GO:0006811//ion transport;GO:0034220//ion transmembrane transport;GO:0035235//ionotropic glutamate receptor signaling pathway;GO:0007268//synaptic transmission;GO:0006810//transport;GO:0006811//ion transport;GO:0034220//ion transmembrane transport;GO:0035235//ionotropic glutamate receptor signaling pathway;GO:0035249//synaptic transmission, glutamatergic;GO:0006810//transpor…
chr18	3268775	3269807	36	97	-1.42999	1.60299e-33	ENSGALG00000001503	3.20788e+23	Intron_down	TBCD	-	-	GO:0005488//binding;GO:0005096//GTPase activator activity;GO:0005515//protein binding;GO:0048487//beta-tubulin binding;GO:0005488//binding	GO:0006457//protein folding;GO:0031115//negative regulation of microtubule polymerization;GO:0007023//post-chaperonin tubulin folding pathway
chrLGE64	293511	294430	33	92	-1.47917	1.66751e-33	ENSGALG00000024408	2.93934e+18	Intron_down	-	-	-	GO:0005515//protein binding	-
chr6	8191317	8192244	48	116	-1.27302	2.01947e-33	ENSGALG00000003135	8.17467e+21	Intron_down	CHANK3	-	GO:0005923//tight junction;GO:0042383//sarcolemma;GO:0016328//lateral plasma membrane;GO:0009925//basal plasma membrane;GO:0016323//basolateral plasma membrane;GO:0016020//membrane;GO:0045202//synapse;GO:0030424//axon;GO:0014704//intercalated disc;GO:0033268//node of Ranvier;GO:0043194//axon initial segment;GO:0033270//paranode region of axon	GO:0005515//protein binding;GO:0005200//structural constituent of cytoskeleton	GO:0007165//signal transduction;GO:0000281//mitotic cytokinesis;GO:0072660//maintenance of protein location in plasma membrane;GO:0071709//membrane assembly;GO:0043001//Golgi to plasma membrane protein transport;GO:0007009//plasma membrane organization;GO:0072661//protein targeting to plasma membrane;GO:0072659//protein localization to plasma membrane;GO:0045184//establishment of protein localiza…
chr10	2983126	2984143	47	114	-1.2783	3.84896e-33	ENSGALG00000002952	2.98327e+20	Intron_down	NRG4	-	-	GO:0005515//protein binding	-
chr8	2587502	2589104	77	159	-1.0461	3.95126e-33	ENSGALG00000002305	2.58763e+19	Intron_down	ZBTB41	-	GO:0005634//nucleus	GO:0003676//nucleic acid binding;GO:0046872//metal ion binding;GO:0005515//protein binding	-
chr15	3057228	3057815	40	103	-1.36457	4.12448e-33	ENSGALG00000002536	2.9787e+22	Intron_down	STX2	ko04130//SNARE interactions in vesicular transport	GO:0016020//membrane;GO:0016021//integral component of membrane;GO:0070062//extracellular vesicular exosome;GO:0016323//basolateral plasma membrane;GO:0031410//cytoplasmic vesicle;GO:0009986//cell surface;GO:0005911//cell-cell junction;GO:0045121//membrane raft	GO:0005515//protein binding	GO:0007340//acrosome reaction;GO:0016192//vesicle-mediated transport;GO:0030154//cell differentiation;GO:0010468//regulation of gene expression;GO:0030193//regulation of blood coagulation
chr5	12777192	12778329	51	120	-1.23447	5.79883e-33	ENSGALG00000006472	1.26121e+25	Intron_down	KCNQ1	ko04725//Cholinergic synapse;ko04972//Pancreatic secretion;ko04971//Gastric acid secretion;ko05110//Vibrio cholerae infection;ko04974//Protein digestion and absorption	GO:0008076//voltage-gated potassium channel complex;GO:0016020//membrane;GO:0016021//integral component of membrane;GO:0008076//voltage-gated potassium channel complex;GO:0016020//membrane;GO:0016021//integral component of membrane;GO:0005764//lysosome;GO:0005769//early endosome;GO:0016323//basolateral plasma membrane;GO:0005770//late endosome	GO:0005216//ion channel activity;GO:0005249//voltage-gated potassium channel activity;GO:0005251//delayed rectifier potassium channel activity;GO:0005267//potassium channel activity;GO:0005216//ion channel activity;GO:0005249//voltage-gated potassium channel activity;GO:0005267//potassium channel activity;GO:0005515//protein binding;GO:0005516//calmodulin binding;GO:0044325//ion channel binding;G…	GO:0006810//transport;GO:0006811//ion transport;GO:0006813//potassium ion transport;GO:0055085//transmembrane transport;GO:0071805//potassium ion transmembrane transport;GO:0006810//transport;GO:0006811//ion transport;GO:0006813//potassium ion transport;GO:0055085//transmembrane transport;GO:0071805//potassium ion transmembrane transport;GO:0035690//cellular response to drug;GO:0060372//regulatio…
chr3	48207106	48208017	50	118	-1.23879	1.12671e-32	ENSGALG00000012971	4.82036e+22	Intron_down	CCDC170	-	-	-	-
chr3	58455718	58456557	41	104	-1.34289	1.20945e-32	ENSGALG00000014821	5.84529e+22	Intron_down	THEMIS	-	GO:0005634//nucleus;GO:0005737//cytoplasm;GO:0005911//cell-cell junction;GO:0008180//COP9 signalosome	GO:0005515//protein binding	GO:0050852//T cell receptor signaling pathway;GO:0043368//positive T cell selection;GO:0043383//negative T cell selection
chr8	15920277	15921296	64	139	-1.11894	1.27084e-32	ENSGALG00000008854	1.5844e+24	Intron_down	-	-	-	-	-
chr5	8501305	8502289	47	113	-1.26559	1.92182e-32	ENSGALG00000005716	8.47055e+21	Intron_down	SBF2	-	GO:0016020//membrane;GO:0005774//vacuolar membrane	GO:0016791//phosphatase activity;GO:0005515//protein binding;GO:0017112//Rab guanyl-nucleotide exchange factor activity;GO:0042803//protein homodimerization activity;GO:0035091//phosphatidylinositol binding;GO:0019902//phosphatase binding;GO:0019208//phosphatase regulator activity	GO:0016311//dephosphorylation;GO:0032851//positive regulation of Rab GTPase activity;GO:0051262//protein tetramerization
chr3	45401311	45402357	40	102	-1.3505	2.21359e-32	ENSGALG00000012256	4.53695e+24	Intron_down	UTRN	-	GO:0070062//extracellular vesicular exosome;GO:0005737//cytoplasm;GO:0005886//plasma membrane;GO:0005634//nucleus;GO:0031527//filopodium membrane;GO:0030175//filopodium;GO:0043234//protein complex;GO:0070938//contractile ring;GO:0045202//synapse;GO:0016010//dystrophin-associated glycoprotein complex;GO:0031594//neuromuscular junction	GO:0003779//actin binding;GO:0005509//calcium ion binding;GO:0008270//zinc ion binding;GO:0005515//protein binding;GO:0005488//binding;GO:0019901//protein kinase binding;GO:0017166//vinculin binding;GO:0005178//integrin binding	GO:0001954//positive regulation of cell-matrix adhesion
chr4	58244378	58245366	51	119	-1.22239	2.7827e-32	ENSGALG00000012219	5.82085e+24	Intron_down	UNC5C	-	GO:0005886//plasma membrane	GO:0005515//protein binding;GO:0005515//protein binding;GO:0005042//netrin receptor activity	GO:0007165//signal transduction;GO:0007165//signal transduction;GO:0007420//brain development;GO:0007411//axon guidance;GO:0030334//regulation of cell migration;GO:0043065//positive regulation of apoptotic process;GO:0033564//anterior/posterior axon guidance;GO:0038007//netrin-activated signaling pathway
chr7	32238129	32239004	44	108	-1.29546	4.26138e-32	ENSGALG00000012421	3.22272e+23	Intron_down	ARHGAP15	-	GO:0005622//intracellular;GO:0005737//cytoplasm;GO:0016020//membrane	GO:0005096//GTPase activator activity;GO:0030675//Rac GTPase activator activity	GO:0007165//signal transduction;GO:0032855//positive regulation of Rac GTPase activity;GO:0008360//regulation of cell shape
chrZ	62125359	62126143	36	95	-1.39993	7.16093e-32	ENSGALG00000015630	6.21228e+23	Intron_down	EDIL3	-	GO:0070062//extracellular vesicular exosome;GO:0031982//vesicle	GO:0005509//calcium ion binding;GO:0005515//protein binding	GO:0007155//cell adhesion;GO:0010811//positive regulation of cell-substrate adhesion
chr3	5163481	5164638	38	98	-1.36678	1.22575e-31	ENSGALG00000020092	5.08933e+23	Intron_down	-	-	-	-	-
chrZ	78761827	78762642	38	98	-1.36678	1.22575e-31	ENSGALG00000008229	7.87604e+22	Intron_down	ALDH7A1	ko01100//Metabolic pathways;ko00010//Glycolysis / Gluconeogenesis;ko00280//Valine, leucine and isoleucine degradation;ko00561//Glycerolipid metabolism;ko00330//Arginine and proline metabolism;ko00310//Lysine degradation;ko00380//Tryptophan metabolism;ko00620//Pyruvate metabolism;ko00071//Fatty acid metabolism;ko00260//Glycine, serine and threonine metabolism;ko00640//Propanoate metabolism;ko00410…	GO:0005739//mitochondrion;GO:0070062//extracellular vesicular exosome;GO:0005737//cytoplasm	GO:0016491//oxidoreductase activity;GO:0016620//oxidoreductase activity, acting on the aldehyde or oxo group of donors, NAD or NADP as acceptor;GO:0005515//protein binding;GO:0004043//L-aminoadipate-semialdehyde dehydrogenase activity	GO:0008152//metabolic process;GO:0055114//oxidation-reduction process
chr3	58668373	58668921	45	109	-1.27633	1.56579e-31	ENSGALG00000014828	5.86665e+22	Intron_down	ECHDC1	-	GO:0070062//extracellular vesicular exosome;GO:0005829//cytosol	GO:0003824//catalytic activity;GO:0016831//carboxy-lyase activity	GO:0008152//metabolic process
chrZ	80028393	80030143	57	127	-1.15579	1.57865e-31	ENSGALG00000018621	8.00083e+24	Intron_down	-	-	GO:0005622//intracellular	-	GO:0007165//signal transduction
chr8	11823668	11824514	49	115	-1.23078	1.68611e-31	ENSGALG00000005509	1.1794e+23	Intron_down	DPYD	ko01100//Metabolic pathways;ko00240//Pyrimidine metabolism;ko00983//Drug metabolism - other enzymes;ko00410//beta-Alanine metabolism;ko00770//Pantothenate and CoA biosynthesis	GO:0005737//cytoplasm;GO:0005829//cytosol	GO:0003824//catalytic activity;GO:0004152//dihydroorotate dehydrogenase activity;GO:0004158//dihydroorotate oxidase activity;GO:0051536//iron-sulfur cluster binding;GO:0017150//tRNA dihydrouridine synthase activity;GO:0050660//flavin adenine dinucleotide binding;GO:0016627//oxidoreductase activity, acting on the CH-CH group of donors;GO:0016491//oxidoreductase activity	GO:0006222//UMP biosynthetic process;GO:0055114//oxidation-reduction process;GO:0008033//tRNA processing;GO:0006214//thymidine catabolic process;GO:0006212//uracil catabolic process;GO:0006145//purine nucleobase catabolic process;GO:0006210//thymine catabolic process;GO:0006208//pyrimidine nucleobase catabolic process
chr5	44027321	44028658	51	118	-1.21022	1.80373e-31	ENSGALG00000010806	4.40259e+23	Intron_down	RIN3	-	GO:0031410//cytoplasmic vesicle;GO:0005769//early endosome	GO:0005515//protein binding;GO:0017112//Rab guanyl-nucleotide exchange factor activity;GO:0017137//Rab GTPase binding	GO:0007165//signal transduction;GO:0032851//positive regulation of Rab GTPase activity
chrLGE22C19W28_E50C23	738709	739658	46	110	-1.2578	2.51433e-31	ENSGALG00000010252	7.34829e+18	Intron_down	-	-	GO:0005882//intermediate filament;GO:0045095//keratin filament;GO:0005882//intermediate filament;GO:0045095//keratin filament	GO:0005198//structural molecule activity;GO:0005198//structural molecule activity	-
chr4	66132725	66133545	48	113	-1.23522	3.28404e-31	ENSGALG00000014124	6.61277e+23	Intron_down	TEC	-	GO:0005856//cytoskeleton;GO:0005911//cell-cell junction	GO:0000166//nucleotide binding;GO:0004672//protein kinase activity;GO:0004713//protein tyrosine kinase activity;GO:0005524//ATP binding;GO:0016301//kinase activity;GO:0016740//transferase activity;GO:0016772//transferase activity, transferring phosphorus-containing groups;GO:0005515//protein binding;GO:0004715//non-membrane spanning protein tyrosine kinase activity	GO:0006468//protein phosphorylation;GO:0016310//phosphorylation;GO:0018108//peptidyl-tyrosine phosphorylation;GO:0035556//intracellular signal transduction;GO:0050853//B cell receptor signaling pathway;GO:0007229//integrin-mediated signaling pathway;GO:0010543//regulation of platelet activation
chr4	33763572	33764518	60	131	-1.12653	3.29893e-31	ENSGALG00000010185	3.37639e+21	Intron_down	HSPA4L	ko04141//Protein processing in endoplasmic reticulum	GO:0005829//cytosol	GO:0000166//nucleotide binding;GO:0005524//ATP binding;GO:0005515//protein binding	GO:0000902//cell morphogenesis
chr15	2403547	2404385	70	146	-1.06054	3.48624e-31	ENSGALG00000002242	2.39898e+20	Intron_down	GALNT9	ko01100//Metabolic pathways;ko00512//Mucin type O-Glycan biosynthesis	GO:0005794//Golgi apparatus;GO:0016020//membrane;GO:0016021//integral component of membrane	GO:0016740//transferase activity;GO:0016757//transferase activity, transferring glycosyl groups;GO:0046872//metal ion binding	GO:0006486//protein glycosylation
chr3	23012555	23013716	70	146	-1.06054	3.48624e-31	ENSGALG00000009915	2.29375e+24	Intron_down	EML4	-	GO:0016020//membrane;GO:0015630//microtubule cytoskeleton;GO:0072686//mitotic spindle	GO:0005515//protein binding	GO:0007026//negative regulation of microtubule depolymerization
chr20	6233363	6234485	56	125	-1.15843	4.89853e-31	ENSGALG00000004570	6.20374e+22	Intron_down	NCOA3	-	GO:0005634//nucleus;GO:0005737//cytoplasm	GO:0003713//transcription coactivator activity;GO:0004402//histone acetyltransferase activity;GO:0004871//signal transducer activity;GO:0030374//ligand-dependent nuclear receptor transcription coactivator activity;GO:0035257//nuclear hormone receptor binding;GO:0046983//protein dimerization activity;GO:0005515//protein binding;GO:0047485//protein N-terminus binding;GO:0016922//ligand-dependent nu…	GO:0006351//transcription, DNA-templated;GO:0006355//regulation of transcription, DNA-templated;GO:0007165//signal transduction;GO:0045944//positive regulation of transcription from RNA polymerase II promoter;GO:0010628//positive regulation of gene expression;GO:2001141//regulation of RNA biosynthetic process;GO:0045618//positive regulation of keratinocyte differentiation;GO:0035264//multicellula…
chr4	53575027	53575738	43	105	-1.28798	5.65939e-31	ENSGALG00000011961	5.3573e+22	Intron_down	TNIP3	-	-	GO:0031593//polyubiquitin binding	GO:0034142//toll-like receptor 4 signaling pathway;GO:0071222//cellular response to lipopolysaccharide;GO:0002756//MyD88-independent toll-like receptor signaling pathway;GO:0043124//negative regulation of I-kappaB kinase/NF-kappaB signaling
chr4	82771089	82772458	74	151	-1.02895	7.39595e-31	ENSGALG00000022958	8.27716e+21	Intron_down	-	-	-	-	-
chr20	12426861	12427677	53	120	-1.17897	8.64522e-31	ENSGALG00000020895	1.24272e+22	Intron_down	-	-	-	-	-
chr20	7103312	7104000	55	123	-1.16115	9.83803e-31	ENSGALG00000004873	7.08316e+21	Intron_down	PHACTR3	-	GO:0005634//nucleus	GO:0003779//actin binding	-
chrZ	80146237	80149391	77	155	-1.00934	1.64137e-30	ENSGALG00000018621	8.01315e+24	Intron_down	-	-	GO:0005622//intracellular	-	GO:0007165//signal transduction
chrJH376399.1	913	3192	46	109	-1.24462	1.69601e-30	ENSGALG00000013504	1.24041e+17	Intron_down	CHIR-B2	-	-	-	-
chr5	6300610	6301672	48	112	-1.22239	2.15758e-30	ENSGALG00000012020	6.25107e+23	Intron_down	KIAA1549L	-	GO:0016021//integral component of membrane;GO:0016021//integral component of membrane	GO:0005524//ATP binding;GO:0042626//ATPase activity, coupled to transmembrane movement of substances;GO:0005524//ATP binding;GO:0042626//ATPase activity, coupled to transmembrane movement of substances	GO:0006810//transport;GO:0055085//transmembrane transport;GO:0006810//transport;GO:0055085//transmembrane transport
chr4	30854489	30856432	71	146	-1.04008	2.44943e-30	ENSGALG00000010006	3.08498e+25	Intron_down	SLC10A7	-	GO:0016020//membrane;GO:0016021//integral component of membrane;GO:0016020//membrane	GO:0015293//symporter activity;GO:0008508//bile acid:sodium symporter activity;GO:0008508//bile acid:sodium symporter activity	GO:0006810//transport;GO:0006811//ion transport;GO:0006814//sodium ion transport;GO:0055085//transmembrane transport;GO:0006814//sodium ion transport
chr3	46421533	46422470	43	104	-1.27417	2.85032e-30	ENSGALG00000012336	4.64185e+23	Intron_down	STXBP5	-	GO:0016021//integral component of membrane;GO:0005737//cytoplasm;GO:0005892//acetylcholine-gated channel complex	GO:0005515//protein binding;GO:0019905//syntaxin binding;GO:0017075//syntaxin-1 binding	GO:0016192//vesicle-mediated transport;GO:0010468//regulation of gene expression;GO:0030193//regulation of blood coagulation;GO:0017157//regulation of exocytosis;GO:0006887//exocytosis
chr3	42614338	42615299	53	119	-1.1669	3.95051e-30	ENSGALG00000011537	4.26141e+22	Intron_down	PDE10A	-	-	GO:0003824//catalytic activity;GO:0004114//3',5'-cyclic-nucleotide phosphodiesterase activity;GO:0008081//phosphoric diester hydrolase activity;GO:0016787//hydrolase activity;GO:0046872//metal ion binding;GO:0005515//protein binding;GO:0004118//cGMP-stimulated cyclic-nucleotide phosphodiesterase activity	GO:0007165//signal transduction;GO:0008152//metabolic process;GO:0010738//regulation of protein kinase A signaling;GO:0043949//regulation of cAMP-mediated signaling
chr3	43854874	43855701	53	119	-1.1669	3.95051e-30	ENSGALG00000011562	4.37658e+24	Intron_down	PARK2	ko04141//Protein processing in endoplasmic reticulum;ko04120//Ubiquitin mediated proteolysis;ko05012//Parkinson's disease	GO:0005739//mitochondrion;GO:0005829//cytosol;GO:0005794//Golgi apparatus;GO:0005737//cytoplasm;GO:0005783//endoplasmic reticulum;GO:0048471//perinuclear region of cytoplasm;GO:0071797//LUBAC complex;GO:0000151//ubiquitin ligase complex;GO:0016235//aggresome;GO:0005634//nucleus;GO:0043234//protein complex;GO:0043005//neuron projection	GO:0004842//ubiquitin-protein ligase activity;GO:0008270//zinc ion binding;GO:0046872//metal ion binding;GO:0005515//protein binding;GO:0019900//kinase binding;GO:0042802//identical protein binding;GO:0031072//heat shock protein binding;GO:0031625//ubiquitin protein ligase binding;GO:0030165//PDZ domain binding;GO:0043130//ubiquitin binding;GO:0019901//protein kinase binding;GO:0051087//chaperone…	GO:0045944//positive regulation of transcription from RNA polymerase II promoter;GO:0016567//protein ubiquitination;GO:0000209//protein polyubiquitination;GO:0044257//cellular protein catabolic process;GO:0070534//protein K63-linked ubiquitination;GO:0001933//negative regulation of protein phosphorylation;GO:0046676//negative regulation of insulin secretion;GO:0043161//proteasome-mediated ubiquit…
chr6	26605807	26606930	72	147	-1.02975	4.68589e-30	ENSGALG00000008883	2.65914e+24	Intron_down	TCF7L2	ko05200//Pathways in cancer;ko04310//Wnt signaling pathway;ko04916//Melanogenesis;ko05215//Prostate cancer;ko04520//Adherens junction;ko05412//Arrhythmogenic right ventricular cardiomyopathy (ARVC);ko05210//Colorectal cancer;ko05213//Endometrial cancer;ko05217//Basal cell carcinoma;ko05221//Acute myeloid leukemia;ko05216//Thyroid cancer	GO:0005634//nucleus;GO:0005634//nucleus;GO:0005667//transcription factor complex;GO:0005737//cytoplasm;GO:0005654//nucleoplasm;GO:0000790//nuclear chromatin;GO:0070369//beta-catenin-TCF7L2 complex;GO:0032993//protein-DNA complex;GO:0005667//transcription factor complex	GO:0008013//beta-catenin binding;GO:0003682//chromatin binding;GO:0003700//sequence-specific DNA binding transcription factor activity;GO:0008013//beta-catenin binding;GO:0043565//sequence-specific DNA binding;GO:0044212//transcription regulatory region DNA binding;GO:0005515//protein binding;GO:0003700//sequence-specific DNA binding transcription factor activity;GO:0000978//RNA polymerase II cor…	GO:0006357//regulation of transcription from RNA polymerase II promoter;GO:0016055//Wnt signaling pathway;GO:0060070//canonical Wnt signaling pathway;GO:2001237//negative regulation of extrinsic apoptotic signaling pathway;GO:0006357//regulation of transcription from RNA polymerase II promoter;GO:0007420//brain development;GO:0016055//Wnt signaling pathway;GO:0048699//generation of neurons;GO:006…
chr7	10992928	10993836	45	107	-1.24961	5.25765e-30	ENSGALG00000008373	1.09928e+22	Intron_down	STRADB	-	GO:0005737//cytoplasm;GO:0005634//nucleus	GO:0004672//protein kinase activity;GO:0005524//ATP binding;GO:0016772//transferase activity, transferring phosphorus-containing groups;GO:0004713//protein tyrosine kinase activity;GO:0005515//protein binding	GO:0006468//protein phosphorylation;GO:0032147//activation of protein kinase activity;GO:0006611//protein export from nucleus;GO:0000902//cell morphogenesis;GO:0007254//JNK cascade;GO:2001240//negative regulation of extrinsic apoptotic signaling pathway in absence of ligand
chr9	1043316	1044275	63	134	-1.08881	5.42183e-30	ENSGALG00000002141	1.04277e+20	Intron_down	UGGT1	ko04141//Protein processing in endoplasmic reticulum	GO:0070062//extracellular vesicular exosome;GO:0005783//endoplasmic reticulum	GO:0003980//UDP-glucose:glycoprotein glucosyltransferase activity;GO:0016757//transferase activity, transferring glycosyl groups;GO:0051082//unfolded protein binding;GO:0005515//protein binding	GO:0006486//protein glycosylation;GO:0097359//UDP-glucosylation
chr15	9027739	9029006	64	135	-1.07682	7.34705e-30	ENSGALG00000006934	9.02574e+21	Intron_down	PATZ1	-	-	GO:0003676//nucleic acid binding;GO:0003677//DNA binding;GO:0046872//metal ion binding;GO:0005515//protein binding;GO:0003682//chromatin binding	GO:0006355//regulation of transcription, DNA-templated;GO:0007283//spermatogenesis;GO:0008584//male gonad development;GO:0010468//regulation of gene expression;GO:0045893//positive regulation of transcription, DNA-templated;GO:0030217//T cell differentiation
chr3	46573747	46575719	60	129	-1.10434	8.26073e-30	ENSGALG00000028420	4.65237e+25	Intron_down	SAMD5	-	-	GO:0005515//protein binding	-
chr4	32955613	32956206	48	111	-1.20945	1.02394e-29	ENSGALG00000023356	3.2951e+23	Intron_down	-	-	-	-	-
chr3	47177643	47178671	50	114	-1.18903	1.06185e-29	ENSGALG00000012345	4.71712e+23	Intron_down	UST	ko00532//Glycosaminoglycan biosynthesis - chondroitin sulfate	GO:0016021//integral component of membrane;GO:0005794//Golgi apparatus	GO:0008146//sulfotransferase activity;GO:0001733//galactosylceramide sulfotransferase activity	GO:0008152//metabolic process;GO:0009058//biosynthetic process
chrZ	19026615	19027629	52	117	-1.16993	1.22693e-29	ENSGALG00000014734	1.9022e+24	Intron_down	-	-	-	GO:0008270//zinc ion binding;GO:0008898//S-adenosylmethionine-homocysteine S-methyltransferase activity	-
chr3	40510881	40511747	36	92	-1.35364	1.63864e-29	ENSGALG00000011195	4.05084e+22	Intron_down	WDR27	-	GO:0005634//nucleus	GO:0005515//protein binding	-
chrJH375951.1	12225	13097	36	92	-1.35364	1.63864e-29	ENSGALG00000028073	1264612762117110	Intron_down	-	-	-	GO:0005515//protein binding	-
chr5	49485784	49486633	41	100	-1.2863	1.67492e-29	ENSGALG00000011368	4.94862e+21	Intron_down	ZNF839	-	-	GO:0046872//metal ion binding	-
chr6	8982623	8983736	43	103	-1.26024	1.95542e-29	ENSGALG00000003612	8.96358e+22	Intron_down	RNLS	-	-	GO:0016491//oxidoreductase activity	GO:0042414//epinephrine metabolic process;GO:0042415//norepinephrine metabolic process;GO:0042417//dopamine metabolic process;GO:0003073//regulation of systemic arterial blood pressure;GO:0003214//cardiac left ventricle morphogenesis;GO:0055062//phosphate ion homeostasis;GO:0060047//heart contraction;GO:0071873//response to norepinephrine
chr3	77281638	77282513	61	130	-1.09163	2.28626e-29	ENSGALG00000015849	7.72584e+23	Intron_down	ME1	ko01100//Metabolic pathways;ko03320//PPAR signaling pathway;ko00620//Pyruvate metabolism	GO:0005739//mitochondrion	GO:0004470//malic enzyme activity;GO:0004471//malate dehydrogenase (decarboxylating) (NAD+) activity;GO:0016491//oxidoreductase activity;GO:0046872//metal ion binding;GO:0051287//NAD binding;GO:0030145//manganese ion binding;GO:0005515//protein binding	GO:0006108//malate metabolic process;GO:0055114//oxidation-reduction process;GO:0051262//protein tetramerization
chr8	15491735	15492851	72	146	-1.0199	2.42252e-29	ENSGALG00000008780	1.54922e+21	Intron_down	CTBS	-	GO:0005615//extracellular space;GO:0070062//extracellular vesicular exosome	GO:0004553//hydrolase activity, hydrolyzing O-glycosyl compounds;GO:0004568//chitinase activity	GO:0005975//carbohydrate metabolic process;GO:0006032//chitin catabolic process
chr9	3013662	3014548	57	124	-1.12131	2.46569e-29	ENSGALG00000006704	3.01331e+20	Intron_down	VPS8	-	-	GO:0008270//zinc ion binding;GO:0046872//metal ion binding;GO:0005515//protein binding;GO:0005488//binding	-
chr6	19604633	19605475	40	98	-1.29278	3.17036e-29	ENSGALG00000006538	1.95965e+23	Intron_down	TBC1D12	-	-	GO:0005097//Rab GTPase activator activity	GO:0032313//regulation of Rab GTPase activity;GO:0032851//positive regulation of Rab GTPase activity
chr8	15890117	15891041	68	140	-1.04182	3.22428e-29	ENSGALG00000008854	1.5844e+23	Intron_down	-	-	-	-	-
chr8	15713884	15715091	66	137	-1.05364	3.84512e-29	ENSGALG00000008850	1.57129e+23	Intron_down	TTLL7	-	-	-	GO:0006464//cellular protein modification process;GO:0018095//protein polyglutamylation
chr3	96732498	96733508	73	147	-1.00985	4.5181e-29	ENSGALG00000016449	9.67324e+21	Intron_down	PQLC3	-	-	-	-
chr7	16524954	16526082	60	128	-1.09311	4.69032e-29	ENSGALG00000009325	1.65122e+24	Intron_down	OLA1	-	GO:0005634//nucleus;GO:0005730//nucleolus;GO:0005737//cytoplasm;GO:0016021//integral component of membrane;GO:0070062//extracellular vesicular exosome;GO:0016020//membrane	GO:0000166//nucleotide binding;GO:0005524//ATP binding;GO:0005525//GTP binding;GO:0016787//hydrolase activity;GO:0016887//ATPase activity;GO:0043022//ribosome binding;GO:0043023//ribosomal large subunit binding;GO:0046872//metal ion binding;GO:0015093//ferrous iron transmembrane transporter activity;GO:0005515//protein binding	GO:0015684//ferrous iron transport;GO:0006200//ATP catabolic process
chrZ	80661276	80662703	60	128	-1.09311	4.69032e-29	ENSGALG00000028127	8.06616e+21	Intron_down	-	-	GO:0005634//nucleus	GO:0003677//DNA binding;GO:0003700//sequence-specific DNA binding transcription factor activity	GO:0006355//regulation of transcription, DNA-templated
chr20	7037607	7038612	44	104	-1.24101	4.96215e-29	ENSGALG00000021232	7.03747e+19	Intron_down	TGM6	-	GO:0005737//cytoplasm	GO:0003810//protein-glutamine gamma-glutamyltransferase activity;GO:0046872//metal ion binding	GO:0018149//peptide cross-linking
chr7	13497080	13497856	42	101	-1.26589	6.05585e-29	ENSGALG00000008885	1.34525e+23	Intron_down	PDE1A	ko04020//Calcium signaling pathway;ko00230//Purine metabolism;ko04740//Olfactory transduction;ko04742//Taste transduction	-	GO:0003824//catalytic activity;GO:0004114//3',5'-cyclic-nucleotide phosphodiesterase activity;GO:0008081//phosphoric diester hydrolase activity;GO:0016787//hydrolase activity;GO:0046872//metal ion binding	GO:0007165//signal transduction;GO:0008152//metabolic process
chrZ	11231755	11232608	42	101	-1.26589	6.05585e-29	ENSGALG00000003605	1.12293e+22	Intron_down	-	-	-	GO:0005488//binding	-
chr3	33129021	33130089	52	116	-1.15754	7.4932e-29	ENSGALG00000010630	3.31242e+23	Intron_down	AHCTF1	-	GO:0070062//extracellular vesicular exosome;GO:0005634//nucleus;GO:0005643//nuclear pore;GO:0000785//chromatin;GO:0031965//nuclear membrane;GO:0031080//nuclear pore outer ring;GO:0000777//condensed chromosome kinetochore;GO:0005737//cytoplasm;GO:0016363//nuclear matrix	GO:0003677//DNA binding;GO:0005515//protein binding;GO:0003700//sequence-specific DNA binding transcription factor activity	GO:0000910//cytokinesis;GO:0051292//nuclear pore complex assembly;GO:0006355//regulation of transcription, DNA-templated
chr4	32951994	32953208	52	116	-1.15754	7.4932e-29	ENSGALG00000023356	3.2951e+24	Intron_down	-	-	-	-	-
chr4	33823033	33824011	52	116	-1.15754	7.4932e-29	ENSGALG00000010201	3.38226e+21	Intron_down	C4H4ORF29	-	-	-	-
chr4	59362617	59363509	72	145	-1.00998	9.42743e-29	ENSGALG00000012222	5.9362e+22	Intron_down	RAP1GDS1	-	GO:0005739//mitochondrion;GO:0070062//extracellular vesicular exosome;GO:0005829//cytosol;GO:0005783//endoplasmic reticulum	GO:0005515//protein binding;GO:0005488//binding	GO:0051561//positive regulation of mitochondrial calcium ion concentration;GO:0032471//negative regulation of endoplasmic reticulum calcium ion concentration
chr5	17768874	17770426	53	117	-1.14244	1.07808e-28	ENSGALG00000013532	1.77641e+23	Intron_down	CAPRIN1	-	GO:0016020//membrane;GO:0005737//cytoplasm	-	GO:0050775//positive regulation of dendrite morphogenesis;GO:0061003//positive regulation of dendritic spine morphogenesis
chr4	63551788	63552417	47	108	-1.2003	1.29446e-28	ENSGALG00000013684	6.3493e+24	Intron_down	SGCZ	-	GO:0016012//sarcoglycan complex;GO:0016021//integral component of membrane;GO:0005886//plasma membrane	GO:0005515//protein binding	-
chr3	38200748	38201746	49	111	-1.17971	1.5217e-28	ENSGALG00000011013	3.82e+23	Intron_down	PCNXL2	-	GO:0016021//integral component of membrane	GO:0003824//catalytic activity	-
chr10	1178473	1179268	45	105	-1.22239	1.67593e-28	ENSGALG00000001901	1.17334e+20	Intron_down	ARIH1	-	GO:0005737//cytoplasm	GO:0008270//zinc ion binding;GO:0046872//metal ion binding;GO:0004842//ubiquitin-protein ligase activity;GO:0031625//ubiquitin protein ligase binding	GO:0006511//ubiquitin-dependent protein catabolic process;GO:0006511//ubiquitin-dependent protein catabolic process
chr5	12382492	12383924	48	109	-1.18322	4.11537e-28	ENSGALG00000006401	1.23792e+23	Intron_down	OSBPL5	-	GO:0016020//membrane	GO:0015485//cholesterol binding	GO:0006810//transport;GO:0006869//lipid transport
chr8	7338268	7339119	63	131	-1.05614	5.05439e-28	ENSGALG00000004587	7.33727e+20	Intron_down	RC3H1	-	GO:0005737//cytoplasm;GO:0010494//cytoplasmic stress granule;GO:0000932//cytoplasmic mRNA processing body	GO:0008270//zinc ion binding;GO:0046872//metal ion binding;GO:0005515//protein binding;GO:0003729//mRNA binding;GO:0003730//mRNA 3'-UTR binding	GO:0010468//regulation of gene expression;GO:0043029//T cell homeostasis;GO:0048536//spleen development;GO:0001782//B cell homeostasis;GO:0010608//posttranscriptional regulation of gene expression;GO:0042098//T cell proliferation;GO:0048535//lymph node development;GO:0061470//T follicular helper cell differentiation;GO:1901224//positive regulation of NIK/NF-kappaB signaling;GO:0046007//negative r…
chr3	4919115	4921270	61	128	-1.06926	5.28229e-28	ENSGALG00000020092	4.84585e+23	Intron_down	-	-	-	-	-
chr20	8717642	8718690	59	125	-1.08314	6.07736e-28	ENSGALG00000005628	8.71753e+19	Intron_down	COL9A3	-	GO:0005594//collagen type IX trimer	-	GO:0008584//male gonad development;GO:0008585//female gonad development
chrZ	51119337	51120189	45	104	-1.20859	7.94218e-28	ENSGALG00000014642	5.11197e+21	Intron_down	CHDZ	-	GO:0005634//nucleus;GO:0005634//nucleus;GO:0005634//nucleus;GO:0005634//nucleus	GO:0003676//nucleic acid binding;GO:0003677//DNA binding;GO:0004386//helicase activity;GO:0005524//ATP binding;GO:0003676//nucleic acid binding;GO:0003677//DNA binding;GO:0004386//helicase activity;GO:0005524//ATP binding;GO:0003676//nucleic acid binding;GO:0003677//DNA binding;GO:0004386//helicase activity;GO:0005524//ATP binding;GO:0003676//nucleic acid binding;GO:0003677//DNA binding;GO:000438…	GO:0008152//metabolic process;GO:0008152//metabolic process;GO:0008152//metabolic process;GO:0008152//metabolic process
chr3	45547981	45548922	47	107	-1.18688	8.19267e-28	ENSGALG00000012256	4.55433e+22	Intron_down	UTRN	-	GO:0070062//extracellular vesicular exosome;GO:0005737//cytoplasm;GO:0005886//plasma membrane;GO:0005634//nucleus;GO:0031527//filopodium membrane;GO:0030175//filopodium;GO:0043234//protein complex;GO:0070938//contractile ring;GO:0045202//synapse;GO:0016010//dystrophin-associated glycoprotein complex;GO:0031594//neuromuscular junction	GO:0003779//actin binding;GO:0005509//calcium ion binding;GO:0008270//zinc ion binding;GO:0005515//protein binding;GO:0005488//binding;GO:0019901//protein kinase binding;GO:0017166//vinculin binding;GO:0005178//integrin binding	GO:0001954//positive regulation of cell-matrix adhesion
chrZ	23789078	23789900	47	107	-1.18688	8.19267e-28	ENSGALG00000014952	2.37889e+23	Intron_down	COL4A3BP	-	GO:0005794//Golgi apparatus;GO:0005634//nucleus;GO:0048471//perinuclear region of cytoplasm;GO:0005739//mitochondrion;GO:0005829//cytosol	GO:0005515//protein binding;GO:0035620//ceramide transporter activity;GO:0097001//ceramide binding;GO:0070273//phosphatidylinositol-4-phosphate binding;GO:0016301//kinase activity	GO:0035621//ER to Golgi ceramide transport;GO:0007165//signal transduction;GO:0000902//cell morphogenesis;GO:0008283//cell proliferation;GO:0006936//muscle contraction;GO:0016310//phosphorylation;GO:0003007//heart morphogenesis;GO:0070584//mitochondrion morphogenesis;GO:0034976//response to endoplasmic reticulum stress;GO:0055088//lipid homeostasis;GO:0006672//ceramide metabolic process;GO:000702…
chr3	47355434	47356613	38	93	-1.29123	1.30191e-27	ENSGALG00000012356	4.73527e+23	Intron_down	TAB2	ko04010//MAPK signaling pathway;ko05145//Toxoplasmosis;ko05162//Measles;ko04620//Toll-like receptor signaling pathway;ko04380//Osteoclast differentiation;ko05140//Leishmaniasis;ko04621//NOD-like receptor signaling pathway	-	GO:0008270//zinc ion binding;GO:0005515//protein binding;GO:0070530//K63-linked polyubiquitin binding	GO:0007507//heart development;GO:0043123//positive regulation of I-kappaB kinase/NF-kappaB signaling;GO:0045860//positive regulation of protein kinase activity
chr4	42578143	42579097	56	120	-1.09954	1.88e-27	ENSGALG00000010732	4.2556e+23	Intron_down	GALNTL6	ko01100//Metabolic pathways;ko00512//Mucin type O-Glycan biosynthesis	GO:0005794//Golgi apparatus;GO:0016020//membrane;GO:0016021//integral component of membrane	GO:0016740//transferase activity;GO:0016757//transferase activity, transferring glycosyl groups;GO:0046872//metal ion binding	GO:0006486//protein glycosylation
chr6	16451175	16452000	47	106	-1.17333	3.7657e-27	ENSGALG00000005637	1.64514e+21	Intron_down	GBF1	-	GO:0005794//Golgi apparatus;GO:0016020//membrane	GO:0005086//ARF guanyl-nucleotide exchange factor activity;GO:0005488//binding;GO:0005515//protein binding	GO:0032012//regulation of ARF protein signal transduction;GO:0043547//positive regulation of GTPase activity
chr7	19446549	19447503	47	106	-1.17333	3.7657e-27	ENSGALG00000011040	1.9437e+23	Intron_down	SCN3A	-	GO:0001518//voltage-gated sodium channel complex;GO:0005886//plasma membrane;GO:0016020//membrane;GO:0016021//integral component of membrane;GO:0005737//cytoplasm;GO:0001518//voltage-gated sodium channel complex;GO:0005886//plasma membrane;GO:0016020//membrane;GO:0016021//integral component of membrane;GO:0005737//cytoplasm	GO:0005216//ion channel activity;GO:0005244//voltage-gated ion channel activity;GO:0005248//voltage-gated sodium channel activity;GO:0005272//sodium channel activity;GO:0005515//protein binding;GO:0005216//ion channel activity;GO:0005244//voltage-gated ion channel activity;GO:0005248//voltage-gated sodium channel activity;GO:0005272//sodium channel activity;GO:0005515//protein binding	GO:0006810//transport;GO:0006811//ion transport;GO:0006814//sodium ion transport;GO:0019228//neuronal action potential;GO:0034765//regulation of ion transmembrane transport;GO:0035725//sodium ion transmembrane transport;GO:0055085//transmembrane transport;GO:0086010//membrane depolarization during action potential;GO:0006810//transport;GO:0006811//ion transport;GO:0006814//sodium ion transport;GO…
chr5	18094276	18095170	51	112	-1.13493	4.02921e-27	ENSGALG00000020471	1.80899e+23	Intron_down	-	-	-	-	-
chrZ	80126359	80127373	66	134	-1.0217	4.22434e-27	ENSGALG00000018621	8.00922e+24	Intron_down	-	-	GO:0005622//intracellular	-	GO:0007165//signal transduction
chr4	79812679	79813576	62	128	-1.0458	5.59714e-27	ENSGALG00000028116	7.97458e+24	Intron_down	-	-	-	-	-
chr5	53451115	53452240	58	122	-1.07276	6.92079e-27	ENSGALG00000011858	5.34496e+24	Intron_down	KCNH5	-	GO:0005887//integral component of plasma membrane;GO:0016020//membrane;GO:0016021//integral component of membrane;GO:0005622//intracellular;GO:0009986//cell surface	GO:0000155//phosphorelay sensor kinase activity;GO:0004871//signal transducer activity;GO:0005216//ion channel activity;GO:0005249//voltage-gated potassium channel activity	GO:0000160//phosphorelay signal transduction system;GO:0006810//transport;GO:0006811//ion transport;GO:0006813//potassium ion transport;GO:0007165//signal transduction;GO:0023014//signal transduction by phosphorylation;GO:0042391//regulation of membrane potential;GO:0055085//transmembrane transport;GO:0071805//potassium ion transmembrane transport;GO:0071805//potassium ion transmembrane transport…
chr5	7927051	7927887	40	95	-1.24793	7.50173e-27	ENSGALG00000005584	7.91971e+21	Intron_down	GALNTL4	ko01100//Metabolic pathways;ko00512//Mucin type O-Glycan biosynthesis	GO:0005794//Golgi apparatus;GO:0016020//membrane;GO:0016021//integral component of membrane;GO:0005794//Golgi apparatus;GO:0016020//membrane;GO:0016021//integral component of membrane	GO:0016740//transferase activity;GO:0016757//transferase activity, transferring glycosyl groups;GO:0046872//metal ion binding;GO:0016740//transferase activity;GO:0016757//transferase activity, transferring glycosyl groups;GO:0046872//metal ion binding	GO:0006486//protein glycosylation;GO:0006486//protein glycosylation
chr5	1243339	1244070	42	98	-1.22239	9.54587e-27	ENSGALG00000004414	1.10814e+22	Intron_down	LUZP2	-	-	-	-
chr5	14054874	14056515	63	129	-1.03395	1.076e-26	ENSGALG00000006697	1.4054e+23	Intron_down	TOLLIP	ko04620//Toll-like receptor signaling pathway	GO:0070062//extracellular vesicular exosome	GO:0005515//protein binding;GO:0019900//kinase binding;GO:0035325//Toll-like receptor binding	GO:0007165//signal transduction;GO:0016310//phosphorylation;GO:0030855//epithelial cell differentiation;GO:0036010//protein localization to endosome
chr5	5323740	5325302	48	107	-1.1565	1.14962e-26	ENSGALG00000012121	5.25717e+22	Intron_down	RCN1	-	GO:0005783//endoplasmic reticulum	GO:0005509//calcium ion binding;GO:0005515//protein binding	GO:0043010//camera-type eye development
chr6	27925288	27926372	61	126	-1.04654	1.16152e-26	ENSGALG00000009152	2.79037e+24	Intron_down	ATRNL1	-	GO:0016020//membrane;GO:0016021//integral component of membrane	GO:0004872//receptor activity;GO:0030246//carbohydrate binding;GO:0005515//protein binding	GO:0007275//multicellular organismal development;GO:0007186//G-protein coupled receptor signaling pathway
chr10	6074593	6075662	53	114	-1.10497	1.61392e-26	ENSGALG00000004087	6.06974e+21	Intron_down	THSD4	-	GO:0031012//extracellular matrix;GO:0070062//extracellular vesicular exosome;GO:0001527//microfibril	GO:0004222//metalloendopeptidase activity;GO:0008233//peptidase activity;GO:0005515//protein binding	GO:0006508//proteolysis;GO:0048251//elastic fiber assembly
chr5	9943632	9944841	66	133	-1.01089	1.64609e-26	ENSGALG00000006035	9.94261e+21	Intron_down	PDE3B	ko00230//Purine metabolism;ko04910//Insulin signaling pathway;ko04914//Progesterone-mediated oocyte maturation	GO:0016020//membrane;GO:0032045//guanyl-nucleotide exchange factor complex	GO:0003824//catalytic activity;GO:0004114//3',5'-cyclic-nucleotide phosphodiesterase activity;GO:0008081//phosphoric diester hydrolase activity;GO:0016787//hydrolase activity;GO:0046872//metal ion binding;GO:0005515//protein binding	GO:0007165//signal transduction;GO:0016525//negative regulation of angiogenesis;GO:0006198//cAMP catabolic process;GO:0050995//negative regulation of lipid catabolic process;GO:0007162//negative regulation of cell adhesion;GO:0042593//glucose homeostasis;GO:0050796//regulation of insulin secretion;GO:0031018//endocrine pancreas development
chrZ	10751762	10752581	51	111	-1.12199	1.76329e-26	ENSGALG00000013372	1.07516e+22	Intron_down	IL7R	ko04060//Cytokine-cytokine receptor interaction;ko04630//Jak-STAT signaling pathway;ko04640//Hematopoietic cell lineage;ko05340//Primary immunodeficiency	GO:0016020//membrane;GO:0009897//external side of plasma membrane	GO:0004896//cytokine receptor activity;GO:0005515//protein binding	GO:0019221//cytokine-mediated signaling pathway;GO:0000902//cell morphogenesis;GO:0016049//cell growth;GO:0048872//homeostasis of number of cells;GO:0008361//regulation of cell size;GO:0042100//B cell proliferation;GO:0010628//positive regulation of gene expression;GO:0048535//lymph node development;GO:0033089//positive regulation of T cell differentiation in thymus;GO:0030217//T cell differentia…
chr10	7373328	7374192	43	99	-1.20309	1.98418e-26	ENSGALG00000004361	7.37368e+20	Intron_down	PRTG	-	GO:0005615//extracellular space	GO:0005515//protein binding;GO:0005515//protein binding	-
chr6	20999559	21000399	45	102	-1.18057	2.33849e-26	ENSGALG00000006989	2.09593e+23	Intron_down	-	ko00534//Glycosaminoglycan biosynthesis - heparan sulfate	-	GO:0008146//sulfotransferase activity	GO:0008152//metabolic process
chr6	8278975	8280200	60	124	-1.04731	2.40966e-26	ENSGALG00000003135	8.21168e+23	Intron_down	CHANK3	-	GO:0005923//tight junction;GO:0042383//sarcolemma;GO:0016328//lateral plasma membrane;GO:0009925//basal plasma membrane;GO:0016323//basolateral plasma membrane;GO:0016020//membrane;GO:0045202//synapse;GO:0030424//axon;GO:0014704//intercalated disc;GO:0033268//node of Ranvier;GO:0043194//axon initial segment;GO:0033270//paranode region of axon	GO:0005515//protein binding;GO:0005200//structural constituent of cytoskeleton	GO:0007165//signal transduction;GO:0000281//mitotic cytokinesis;GO:0072660//maintenance of protein location in plasma membrane;GO:0071709//membrane assembly;GO:0043001//Golgi to plasma membrane protein transport;GO:0007009//plasma membrane organization;GO:0072661//protein targeting to plasma membrane;GO:0072659//protein localization to plasma membrane;GO:0045184//establishment of protein localiza…
chr7	30109802	30110821	54	115	-1.0906	3.34805e-26	ENSGALG00000012246	3.01088e+23	Intron_down	R3HDM1	-	-	GO:0003676//nucleic acid binding	-
chr6	22117328	22118299	65	131	-1.01106	3.43618e-26	ENSGALG00000007658	2.21172e+22	Intron_down	C10orf76	-	-	GO:0005488//binding	-
chr3	26305882	26306842	40	94	-1.23266	3.64802e-26	ENSGALG00000010020	2.62948e+23	Intron_down	TTC7A	-	-	GO:0005515//protein binding	GO:0030097//hemopoiesis;GO:0006879//cellular iron ion homeostasis
chr3	47519498	47520442	50	109	-1.12433	4.81548e-26	ENSGALG00000012388	4.75198e+22	Intron_down	PCMT1	-	GO:0005737//cytoplasm	GO:0004719//protein-L-isoaspartate (D-aspartate) O-methyltransferase activity;GO:0008168//methyltransferase activity;GO:0016740//transferase activity;GO:0008276//protein methyltransferase activity	GO:0006464//cellular protein modification process;GO:0032259//methylation;GO:0006479//protein methylation;GO:0008152//metabolic process
chr19	7235973	7236916	48	106	-1.14296	5.12812e-26	ENSGALG00000028801	7.23399e+21	Intron_down	YPEL1	-	-	-	-
chr4	15331108	15332361	48	106	-1.14296	5.12812e-26	ENSGALG00000008442	1.52799e+24	Intron_down	ODZ1	-	GO:0016021//integral component of membrane;GO:0005887//integral component of plasma membrane;GO:0048471//perinuclear region of cytoplasm	GO:0003824//catalytic activity;GO:0005515//protein binding;GO:0042803//protein homodimerization activity;GO:0046982//protein heterodimerization activity	GO:0007165//signal transduction;GO:0008152//metabolic process;GO:0033138//positive regulation of peptidyl-serine phosphorylation;GO:0051491//positive regulation of filopodium assembly;GO:0030838//positive regulation of actin filament polymerization;GO:0043406//positive regulation of MAP kinase activity;GO:0006359//regulation of transcription from RNA polymerase III promoter
chr7	17187935	17188891	48	106	-1.14296	5.12812e-26	ENSGALG00000013233	1.71838e+22	Intron_down	-	-	GO:0005634//nucleus;GO:0005739//mitochondrion	GO:0005515//protein binding;GO:0043565//sequence-specific DNA binding	GO:0006915//apoptotic process;GO:0006919//activation of cysteine-type endopeptidase activity involved in apoptotic process
chr11	4806582	4807221	39	92	-1.23816	7.09664e-26	ENSGALG00000003737	4.80406e+21	Intron_down	TOX3	-	-	GO:0005515//protein binding;GO:0003682//chromatin binding;GO:0042803//protein homodimerization activity;GO:0051219//phosphoprotein binding;GO:0034056//estrogen response element binding	GO:0045893//positive regulation of transcription, DNA-templated;GO:0043524//negative regulation of neuron apoptotic process
chr9	1019520	1020310	39	92	-1.23816	7.09664e-26	ENSGALG00000002141	1.01787e+20	Intron_down	UGGT1	ko04141//Protein processing in endoplasmic reticulum	GO:0070062//extracellular vesicular exosome;GO:0005783//endoplasmic reticulum	GO:0003980//UDP-glucose:glycoprotein glucosyltransferase activity;GO:0016757//transferase activity, transferring glycosyl groups;GO:0051082//unfolded protein binding;GO:0005515//protein binding	GO:0006486//protein glycosylation;GO:0097359//UDP-glucosylation
chrZ	46025332	46026343	43	98	-1.18845	9.27019e-26	ENSGALG00000000234	4.60112e+24	Intron_down	EPB41L4A	-	GO:0005856//cytoskeleton	-	-
chr9	9727710	9729004	41	95	-1.2123	1.21743e-25	ENSGALG00000002850	9.72817e+19	Intron_down	RASA2	ko04010//MAPK signaling pathway	GO:0005622//intracellular;GO:0005737//cytoplasm;GO:0031235//intrinsic component of the cytoplasmic side of the plasma membrane	GO:0005096//GTPase activator activity;GO:0005099//Ras GTPase activator activity;GO:0005515//protein binding	GO:0007165//signal transduction;GO:0032320//positive regulation of Ras GTPase activity;GO:0035556//intracellular signal transduction;GO:0046580//negative regulation of Ras protein signal transduction;GO:0051056//regulation of small GTPase mediated signal transduction
chr4	44145950	44146738	58	120	-1.04891	1.53181e-25	ENSGALG00000010864	4.4142e+22	Intron_down	EREG	ko04012//ErbB signaling pathway	GO:0005615//extracellular space	GO:0005515//protein binding;GO:0005154//epidermal growth factor receptor binding	GO:0045892//negative regulation of transcription, DNA-templated;GO:0045860//positive regulation of protein kinase activity;GO:0019221//cytokine-mediated signaling pathway;GO:0007267//cell-cell signaling;GO:0051151//negative regulation of smooth muscle cell differentiation;GO:0048146//positive regulation of fibroblast proliferation;GO:0043616//keratinocyte proliferation;GO:0042108//positive regula…
chr3	71101586	71102673	56	117	-1.06301	1.80976e-25	ENSGALG00000015490	7.1099e+23	Intron_down	FBXL4	-	GO:0005634//nucleus;GO:0005758//mitochondrial intermembrane space	GO:0005515//protein binding	-
chr3	24631050	24632271	50	108	-1.11103	2.0868e-25	ENSGALG00000009967	2.46101e+24	Intron_down	LRPPRC	-	GO:0005856//cytoskeleton;GO:0005739//mitochondrion;GO:0016020//membrane;GO:0005634//nucleus;GO:0005874//microtubule;GO:0048471//perinuclear region of cytoplasm;GO:0042645//mitochondrial nucleoid;GO:0000794//condensed nuclear chromosome;GO:0005737//cytoplasm;GO:0030529//ribonucleoprotein complex	GO:0005515//protein binding;GO:0048487//beta-tubulin binding;GO:0003723//RNA binding;GO:0003697//single-stranded DNA binding	GO:0000961//negative regulation of mitochondrial RNA catabolic process;GO:0070129//regulation of mitochondrial translation
chr3	57524529	57525526	50	108	-1.11103	2.0868e-25	ENSGALG00000014013	5.75066e+23	Intron_down	ARHGAP18	-	GO:0005622//intracellular	-	GO:0007165//signal transduction
chr4	65539328	65540512	61	124	-1.02346	2.42697e-25	ENSGALG00000013946	6.55382e+23	Intron_down	SCFD2	-	-	-	GO:0006904//vesicle docking involved in exocytosis;GO:0016192//vesicle-mediated transport
chr9	8981224	8982598	42	96	-1.19265	2.88454e-25	ENSGALG00000003052	8.98098e+21	Intron_down	AGFG1	-	GO:0043231//intracellular membrane-bounded organelle;GO:0043025//neuronal cell body;GO:0042995//cell projection;GO:0016023//cytoplasmic membrane-bounded vesicle	GO:0008060//ARF GTPase activator activity;GO:0008270//zinc ion binding;GO:0005515//protein binding	GO:0032312//regulation of ARF GTPase activity;GO:0043547//positive regulation of GTPase activity;GO:0001675//acrosome assembly;GO:0045109//intermediate filament organization;GO:0007289//spermatid nucleus differentiation
chr6	5828611	5829279	59	121	-1.03622	2.95775e-25	ENSGALG00000002744	5.78829e+21	Intron_down	PCDH15	-	GO:0005886//plasma membrane;GO:0016020//membrane;GO:0005886//plasma membrane;GO:0016020//membrane;GO:0016021//integral component of membrane;GO:0005737//cytoplasm;GO:0001750//photoreceptor outer segment;GO:0032420//stereocilium	GO:0005509//calcium ion binding;GO:0005509//calcium ion binding;GO:0005515//protein binding	GO:0007155//cell adhesion;GO:0007156//homophilic cell adhesion;GO:0007155//cell adhesion;GO:0007156//homophilic cell adhesion;GO:0007626//locomotory behavior;GO:0048839//inner ear development;GO:0042491//auditory receptor cell differentiation;GO:0007605//sensory perception of sound;GO:0035264//multicellular organism growth;GO:0007628//adult walking behavior;GO:0007601//visual perception;GO:000196…
chr5	1232250	1233748	57	118	-1.04975	3.17758e-25	ENSGALG00000004414	1.10814e+23	Intron_down	LUZP2	-	-	-	-
chr5	37953178	37954140	57	118	-1.04975	3.17758e-25	ENSGALG00000010365	3.79178e+23	Intron_down	ESRRB	-	GO:0005634//nucleus	GO:0003677//DNA binding;GO:0003700//sequence-specific DNA binding transcription factor activity;GO:0003707//steroid hormone receptor activity;GO:0005496//steroid binding;GO:0008270//zinc ion binding;GO:0043565//sequence-specific DNA binding;GO:0046872//metal ion binding;GO:0005515//protein binding;GO:0003713//transcription coactivator activity;GO:0000980//RNA polymerase II distal enhancer sequenc…	GO:0006351//transcription, DNA-templated;GO:0006355//regulation of transcription, DNA-templated;GO:0043401//steroid hormone mediated signaling pathway;GO:0045944//positive regulation of transcription from RNA polymerase II promoter;GO:0001892//embryonic placenta development;GO:0019827//stem cell maintenance;GO:0001831//trophectodermal cellular morphogenesis;GO:0001834//trophectodermal cell prolif…
chr20	6095908	6096735	53	112	-1.07943	3.85216e-25	ENSGALG00000004508	6.09577e+20	Intron_down	EYA2	-	GO:0005813//centrosome;GO:0005737//cytoplasm;GO:0005634//nucleus;GO:0005739//mitochondrion	GO:0004725//protein tyrosine phosphatase activity;GO:0005515//protein binding;GO:0000287//magnesium ion binding	GO:0007275//multicellular organismal development;GO:0014706//striated muscle tissue development;GO:0016576//histone dephosphorylation;GO:0097192//extrinsic apoptotic signaling pathway in absence of ligand;GO:0006470//protein dephosphorylation;GO:0097345//mitochondrial outer membrane permeabilization
chrZ	79508360	79509585	53	112	-1.07943	3.85216e-25	ENSGALG00000005016	7.9487e+24	Intron_down	ZNF608	-	-	GO:0046872//metal ion binding	-
chr3	70389343	70390217	60	122	-1.02385	5.05765e-25	ENSGALG00000015466	7.03809e+23	Intron_down	SIM1	-	GO:0005634//nucleus	GO:0003677//DNA binding;GO:0003700//sequence-specific DNA binding transcription factor activity;GO:0004871//signal transducer activity;GO:0046983//protein dimerization activity;GO:0005515//protein binding;GO:0046982//protein heterodimerization activity	GO:0006351//transcription, DNA-templated;GO:0006355//regulation of transcription, DNA-templated;GO:0007165//signal transduction;GO:0001657//ureteric bud development
chr9	12521566	12522373	60	122	-1.02385	5.05765e-25	ENSGALG00000007150	1.25077e+23	Intron_down	OPA1	-	GO:0005741//mitochondrial outer membrane;GO:0005739//mitochondrion;GO:0016020//membrane;GO:0030061//mitochondrial crista;GO:0005743//mitochondrial inner membrane	GO:0000166//nucleotide binding;GO:0003924//GTPase activity;GO:0005525//GTP binding;GO:0005515//protein binding;GO:0000166//nucleotide binding;GO:0003924//GTPase activity;GO:0005525//GTP binding	GO:0006184//GTP catabolic process;GO:0007601//visual perception;GO:0007007//inner mitochondrial membrane organization;GO:1902236//negative regulation of intrinsic apoptotic signaling pathway in response to endoplasmic reticulum stress;GO:0090201//negative regulation of release of cytochrome c from mitochondria;GO:0090398//cellular senescence;GO:0008053//mitochondrial fusion;GO:0001843//neural tub…
chrZ	41564291	41565152	58	119	-1.03684	6.15116e-25	ENSGALG00000012618	4.15215e+23	Intron_down	FANCC	-	GO:0005829//cytosol;GO:0043240//Fanconi anaemia nuclear complex	GO:0005488//binding;GO:0005488//binding;GO:0005515//protein binding	GO:0006281//DNA repair;GO:0006281//DNA repair;GO:0007281//germ cell development;GO:0019430//removal of superoxide radicals;GO:0007276//gamete generation;GO:0006289//nucleotide-excision repair;GO:0002262//myeloid cell homeostasis
chr5	13864017	13864996	61	123	-1.01178	9.49654e-25	ENSGALG00000006681	1.37095e+24	Intron_down	BRSK2	-	GO:0005813//centrosome;GO:0005737//cytoplasm	GO:0000166//nucleotide binding;GO:0004672//protein kinase activity;GO:0004674//protein serine/threonine kinase activity;GO:0005524//ATP binding;GO:0016772//transferase activity, transferring phosphorus-containing groups;GO:0004713//protein tyrosine kinase activity;GO:0000287//magnesium ion binding;GO:0005515//protein binding;GO:0019901//protein kinase binding;GO:0050321//tau-protein kinase activi…	GO:0006468//protein phosphorylation;GO:0031532//actin cytoskeleton reorganization;GO:0000086//G2/M transition of mitotic cell cycle;GO:0070059//intrinsic apoptotic signaling pathway in response to endoplasmic reticulum stress;GO:0048812//neuron projection morphogenesis;GO:0007409//axonogenesis;GO:0030182//neuron differentiation;GO:0018105//peptidyl-serine phosphorylation;GO:0061178//regulation of…
chr3	3145327	3146960	46	101	-1.13465	1.25238e-24	ENSGALG00000008257	3.14567e+21	Intron_down	MERTK	-	GO:0016020//membrane;GO:0016021//integral component of membrane;GO:0005615//extracellular space;GO:0005737//cytoplasm;GO:0016028//rhabdomere	GO:0000166//nucleotide binding;GO:0004672//protein kinase activity;GO:0004713//protein tyrosine kinase activity;GO:0005524//ATP binding;GO:0016301//kinase activity;GO:0016740//transferase activity;GO:0016772//transferase activity, transferring phosphorus-containing groups;GO:0005515//protein binding	GO:0006468//protein phosphorylation;GO:0016310//phosphorylation;GO:0018108//peptidyl-tyrosine phosphorylation;GO:0050766//positive regulation of phagocytosis;GO:0006909//phagocytosis;GO:0007283//spermatogenesis;GO:0060041//retina development in camera-type eye;GO:0060068//vagina development;GO:0001779//natural killer cell differentiation;GO:0043491//protein kinase B signaling;GO:0043277//apoptoti…
chr4	50277633	50278692	46	101	-1.13465	1.25238e-24	ENSGALG00000011658	5.02781e+22	Intron_down	-	-	GO:0005615//extracellular space	-	GO:0006810//transport
chr5	28385510	28386422	53	111	-1.0665	1.59957e-24	ENSGALG00000009587	2.83299e+24	Intron_down	GPHN	-	GO:0005622//intracellular;GO:0060077//inhibitory synapse	-	GO:0006777//Mo-molybdopterin cofactor biosynthetic process;GO:0032324//molybdopterin cofactor biosynthetic process;GO:0007529//establishment of synaptic specificity at neuromuscular junction;GO:0072579//glycine receptor clustering;GO:0006777//Mo-molybdopterin cofactor biosynthetic process;GO:0032324//molybdopterin cofactor biosynthetic process
chr7	27067233	27068026	60	121	-1.01197	1.98256e-24	ENSGALG00000011744	2.70646e+22	Intron_down	KALRN	-	GO:0070062//extracellular vesicular exosome	GO:0000166//nucleotide binding;GO:0004672//protein kinase activity;GO:0004674//protein serine/threonine kinase activity;GO:0005089//Rho guanyl-nucleotide exchange factor activity;GO:0005524//ATP binding;GO:0016301//kinase activity;GO:0016740//transferase activity;GO:0016772//transferase activity, transferring phosphorus-containing groups;GO:0005515//protein binding;GO:0004713//protein tyrosine ki…	GO:0006468//protein phosphorylation;GO:0016310//phosphorylation;GO:0032321//positive regulation of Rho GTPase activity;GO:0035023//regulation of Rho protein signal transduction
chr3	66256157	66256965	39	90	-1.20645	2.23669e-24	ENSGALG00000015070	6.6203e+23	Intron_down	FIG4	-	GO:0010008//endosome membrane	GO:0042578//phosphoric ester hydrolase activity;GO:0005515//protein binding;GO:0042578//phosphoric ester hydrolase activity	GO:0007626//locomotory behavior;GO:0043473//pigmentation;GO:0046488//phosphatidylinositol metabolic process;GO:0048666//neuron development;GO:0031642//negative regulation of myelination;GO:0032288//myelin assembly;GO:0007033//vacuole organization;GO:0008152//metabolic process
chr7	11342757	11343723	51	108	-1.08246	2.44799e-24	ENSGALG00000008459	1.13213e+23	Intron_down	BMPR-II	ko04060//Cytokine-cytokine receptor interaction;ko04350//TGF-beta signaling pathway	GO:0016020//membrane;GO:0016021//integral component of membrane;GO:0005615//extracellular space;GO:0005887//integral component of plasma membrane;GO:0005886//plasma membrane;GO:0005901//caveola;GO:0009986//cell surface	GO:0000166//nucleotide binding;GO:0004672//protein kinase activity;GO:0004674//protein serine/threonine kinase activity;GO:0004675//transmembrane receptor protein serine/threonine kinase activity;GO:0004702//receptor signaling protein serine/threonine kinase activity;GO:0005024//transforming growth factor beta-activated receptor activity;GO:0005524//ATP binding;GO:0016301//kinase activity;GO:0016…	GO:0006468//protein phosphorylation;GO:0007178//transmembrane receptor protein serine/threonine kinase signaling pathway;GO:0016310//phosphorylation;GO:0023014//signal transduction by phosphorylation;GO:0030308//negative regulation of cell growth;GO:0006366//transcription from RNA polymerase II promoter;GO:0045669//positive regulation of osteoblast differentiation;GO:0030501//positive regulation …
chr3	79822700	79823600	47	102	-1.11784	2.69356e-24	ENSGALG00000015897	7.98224e+21	Intron_down	IMPG1	-	GO:0005576//extracellular region	-	-
chr9	5665992	5666849	47	102	-1.11784	2.69356e-24	ENSGALG00000005310	5.56732e+22	Intron_down	CLSTN2	-	GO:0016020//membrane;GO:0016021//integral component of membrane;GO:0045211//postsynaptic membrane	GO:0005509//calcium ion binding	GO:0007156//homophilic cell adhesion
chr4	55773110	55773899	49	105	-1.09954	3.69231e-24	ENSGALG00000012015	5.57642e+23	Intron_down	NDST4	ko01100//Metabolic pathways;ko00534//Glycosaminoglycan biosynthesis - heparan sulfate	-	GO:0008146//sulfotransferase activity;GO:0015016//[heparan sulfate]-glucosamine N-sulfotransferase activity;GO:0016787//hydrolase activity;GO:0019213//deacetylase activity	GO:0008152//metabolic process
chr5	25873130	25873840	54	112	-1.05247	4.19313e-24	ENSGALG00000009352	2.58549e+23	Intron_down	DPF3	-	GO:0071565//nBAF complex	GO:0008270//zinc ion binding;GO:0046872//metal ion binding;GO:0005515//protein binding;GO:0008270//zinc ion binding;GO:0046872//metal ion binding;GO:0005515//protein binding	GO:0007399//nervous system development
chrZ	33542471	33544028	50	106	-1.08406	5.04065e-24	ENSGALG00000015083	3.35386e+23	Intron_down	DENND4C	-	GO:0005886//plasma membrane;GO:0005829//cytosol;GO:0030904//retromer complex;GO:0032593//insulin-responsive compartment	GO:0017112//Rab guanyl-nucleotide exchange factor activity	GO:0032851//positive regulation of Rab GTPase activity;GO:0072659//protein localization to plasma membrane;GO:0032869//cellular response to insulin stimulus
chr3	88978513	88979431	46	100	-1.12029	5.48932e-24	ENSGALG00000016341	8.895e+24	Intron_down	CSMD1	-	-	-	GO:0042593//glucose homeostasis;GO:0001964//startle response
chr4	20285256	20286373	46	100	-1.12029	5.48932e-24	ENSGALG00000009361	2.0284e+23	Intron_down	GUCY1B3	-	GO:0043231//intracellular membrane-bounded organelle;GO:0005737//cytoplasm	GO:0000166//nucleotide binding;GO:0004383//guanylate cyclase activity;GO:0016829//lyase activity;GO:0016849//phosphorus-oxygen lyase activity;GO:0020037//heme binding	GO:0006182//cGMP biosynthetic process;GO:0009190//cyclic nucleotide biosynthetic process;GO:0035556//intracellular signal transduction
chr8	2428521	2429469	59	119	-1.01217	6.02725e-24	ENSGALG00000002246	2.42123e+20	Intron_down	DENND1B	-	-	GO:0017112//Rab guanyl-nucleotide exchange factor activity	GO:0032851//positive regulation of Rab GTPase activity
chr10	6998411	6999414	52	109	-1.06774	6.53497e-24	ENSGALG00000004304	6.90556e+23	Intron_down	TCF12	-	GO:0005737//cytoplasm;GO:0005634//nucleus;GO:0000790//nuclear chromatin;GO:0005667//transcription factor complex	GO:0046983//protein dimerization activity;GO:0046983//protein dimerization activity;GO:0005515//protein binding;GO:0003700//sequence-specific DNA binding transcription factor activity;GO:0043425//bHLH transcription factor binding;GO:0044212//transcription regulatory region DNA binding;GO:0046332//SMAD binding;GO:0008134//transcription factor binding;GO:0003677//DNA binding;GO:0046982//protein het…	GO:0045893//positive regulation of transcription, DNA-templated;GO:0045666//positive regulation of neuron differentiation;GO:0010628//positive regulation of gene expression
chr4	58058810	58059824	53	110	-1.05344	8.69402e-24	ENSGALG00000012216	5.80516e+25	Intron_down	BMPR1B	ko04060//Cytokine-cytokine receptor interaction;ko04350//TGF-beta signaling pathway	GO:0016020//membrane;GO:0016021//integral component of membrane;GO:0044214//fully spanning plasma membrane;GO:0016020//membrane;GO:0016021//integral component of membrane;GO:0044214//fully spanning plasma membrane	GO:0000166//nucleotide binding;GO:0004672//protein kinase activity;GO:0004674//protein serine/threonine kinase activity;GO:0004702//receptor signaling protein serine/threonine kinase activity;GO:0005524//ATP binding;GO:0016301//kinase activity;GO:0016740//transferase activity;GO:0016772//transferase activity, transferring phosphorus-containing groups;GO:0004675//transmembrane receptor protein ser…	GO:0006468//protein phosphorylation;GO:0007178//transmembrane receptor protein serine/threonine kinase signaling pathway;GO:0016310//phosphorylation;GO:0023014//signal transduction by phosphorylation;GO:0002063//chondrocyte development;GO:0006468//protein phosphorylation;GO:0007178//transmembrane receptor protein serine/threonine kinase signaling pathway;GO:0016310//phosphorylation;GO:0023014//si…
chr5	36317766	36318272	53	110	-1.05344	8.69402e-24	ENSGALG00000010118	3.63131e+23	Intron_down	MIPOL1	-	GO:0005634//nucleus	-	-
chr14	11827790	11829640	51	107	-1.06904	1.35146e-23	ENSGALG00000013170	1.18117e+24	Intron_down	GSG1L	-	GO:0016021//integral component of membrane;GO:0032279//asymmetric synapse	-	-
chr4	13881361	13882255	54	111	-1.03953	1.692e-23	ENSGALG00000008141	1.38641e+23	Intron_down	COL4A5	ko05200//Pathways in cancer;ko04510//Focal adhesion;ko05146//Amoebiasis;ko05222//Small cell lung cancer;ko04512//ECM-receptor interaction;ko04974//Protein digestion and absorption	GO:0005581//collagen trimer;GO:0005604//basement membrane;GO:0031594//neuromuscular junction;GO:0005605//basal lamina;GO:0005587//collagen type IV trimer	GO:0005201//extracellular matrix structural constituent	GO:0007528//neuromuscular junction development
chrZ	46038905	46039786	45	98	-1.12286	1.70338e-23	ENSGALG00000000234	4.60112e+23	Intron_down	EPB41L4A	-	GO:0005856//cytoskeleton	-	-
chrZ	80152944	80154360	50	105	-1.07039	2.7934e-23	ENSGALG00000018621	8.01496e+24	Intron_down	-	-	GO:0005622//intracellular	-	GO:0007165//signal transduction
chr5	29730940	29731927	46	99	-1.10579	3.18019e-23	ENSGALG00000009723	2.97214e+23	Intron_down	FMN1	-	GO:0005884//actin filament	-	GO:0045010//actin nucleation
chr6	29696608	29697466	46	99	-1.10579	3.18019e-23	ENSGALG00000009403	2.96834e+23	Intron_down	GRK5	ko04144//Endocytosis;ko04062//Chemokine signaling pathway	GO:0005886//plasma membrane	GO:0000166//nucleotide binding;GO:0004672//protein kinase activity;GO:0004674//protein serine/threonine kinase activity;GO:0004703//G-protein coupled receptor kinase activity;GO:0005524//ATP binding;GO:0016301//kinase activity;GO:0016740//transferase activity;GO:0016772//transferase activity, transferring phosphorus-containing groups;GO:0004713//protein tyrosine kinase activity;GO:0005515//protei…	GO:0006468//protein phosphorylation;GO:0007165//signal transduction;GO:0016310//phosphorylation;GO:0038032//termination of G-protein coupled receptor signaling pathway;GO:0008277//regulation of G-protein coupled receptor protein signaling pathway;GO:0007217//tachykinin receptor signaling pathway;GO:0043066//negative regulation of apoptotic process;GO:0046777//protein autophosphorylation
chr9	9988569	9989142	48	102	-1.08746	3.20474e-23	ENSGALG00000002647	9.97563e+21	Intron_down	PLS1	-	GO:0005737//cytoplasm;GO:0005903//brush border;GO:0070062//extracellular vesicular exosome	GO:0003779//actin binding;GO:0005509//calcium ion binding;GO:0046872//metal ion binding;GO:0005515//protein binding	-
chr19	4963788	4965027	55	112	-1.026	4.26072e-23	ENSGALG00000002587	4.9622e+21	Intron_down	CRCP	-	GO:0009360//DNA polymerase III complex;GO:0001669//acrosomal vesicle	GO:0000166//nucleotide binding;GO:0003824//catalytic activity;GO:0003899//DNA-directed RNA polymerase activity;GO:0001635//calcitonin gene-related polypeptide receptor activity	GO:0006351//transcription, DNA-templated;GO:0044237//cellular metabolic process;GO:0006383//transcription from RNA polymerase III promoter;GO:0007218//neuropeptide signaling pathway
chrAADN03016058.1	1438	2296	38	87	-1.19502	4.45568e-23	ENSGALG00000027656	17812004224224	Intron_down	-	-	-	GO:0003676//nucleic acid binding;GO:0004386//helicase activity;GO:0005524//ATP binding;GO:0008270//zinc ion binding;GO:0016787//hydrolase activity	GO:0008152//metabolic process
chr3	33552692	33553762	53	109	-1.04026	4.64458e-23	ENSGALG00000010653	3.34067e+25	Intron_down	SMYD3	-	GO:0005634//nucleus	GO:0005515//protein binding;GO:0000979//RNA polymerase II core promoter sequence-specific DNA binding;GO:0018024//histone-lysine N-methyltransferase activity;GO:0000993//RNA polymerase II core binding;GO:0001162//RNA polymerase II intronic transcription regulatory region sequence-specific DNA binding	GO:0045944//positive regulation of transcription from RNA polymerase II promoter;GO:0071549//cellular response to dexamethasone stimulus;GO:0014904//myotube cell development;GO:0006469//negative regulation of protein kinase activity;GO:0033138//positive regulation of peptidyl-serine phosphorylation;GO:0006334//nucleosome assembly;GO:0045184//establishment of protein localization
chr10	18306387	18307200	47	100	-1.08927	6.59362e-23	ENSGALG00000007870	1.82838e+23	Intron_down	SMAD3	ko05200//Pathways in cancer;ko04144//Endocytosis;ko04310//Wnt signaling pathway;ko04110//Cell cycle;ko05142//Chagas disease (American trypanosomiasis);ko04520//Adherens junction;ko04350//TGF-beta signaling pathway;ko05220//Chronic myeloid leukemia;ko05212//Pancreatic cancer;ko05210//Colorectal cancer	GO:0005622//intracellular;GO:0005634//nucleus;GO:0005667//transcription factor complex;GO:0005737//cytoplasm;GO:0071141//SMAD protein complex;GO:0005737//cytoplasm;GO:0005634//nucleus;GO:0000790//nuclear chromatin;GO:0043235//receptor complex;GO:0005637//nuclear inner membrane;GO:0071144;GO:0071141//SMAD protein complex;GO:0005886//plasma membrane;GO:0005622//intracellular;GO:0005634//nucleus;GO:…	GO:0000987//core promoter proximal region sequence-specific DNA binding;GO:0003677//DNA binding;GO:0003700//sequence-specific DNA binding transcription factor activity;GO:0046872//metal ion binding;GO:0005515//protein binding;GO:0008270//zinc ion binding;GO:0031625//ubiquitin protein ligase binding;GO:0042803//protein homodimerization activity;GO:0043565//sequence-specific DNA binding;GO:0005160/…	GO:0006351//transcription, DNA-templated;GO:0006355//regulation of transcription, DNA-templated;GO:0007179//transforming growth factor beta receptor signaling pathway;GO:0030308//negative regulation of cell growth;GO:0045893//positive regulation of transcription, DNA-templated;GO:0045944//positive regulation of transcription from RNA polymerase II promoter;GO:0000122//negative regulation of trans…
chrZ	11467851	11468721	47	100	-1.08927	6.59362e-23	ENSGALG00000003708	1.14676e+22	Intron_down	WDR70	-	-	GO:0005515//protein binding;GO:0019899//enzyme binding	-
chr3	68458647	68459547	43	94	-1.12832	7.05643e-23	ENSGALG00000015415	6.84591e+21	Intron_down	HACE1	-	GO:0000139//Golgi membrane;GO:0005737//cytoplasm;GO:0005783//endoplasmic reticulum;GO:0005794//Golgi apparatus;GO:0016020//membrane;GO:0032580//Golgi cisterna membrane;GO:0000139//Golgi membrane;GO:0000139//Golgi membrane;GO:0005737//cytoplasm;GO:0005783//endoplasmic reticulum;GO:0005794//Golgi apparatus;GO:0016020//membrane;GO:0032580//Golgi cisterna membrane	GO:0004842//ubiquitin-protein ligase activity;GO:0016874//ligase activity;GO:0017137//Rab GTPase binding;GO:0005515//protein binding;GO:0017137//Rab GTPase binding;GO:0048365//Rac GTPase binding;GO:0004842//ubiquitin-protein ligase activity;GO:0016874//ligase activity;GO:0017137//Rab GTPase binding;GO:0005515//protein binding	GO:0007030//Golgi organization;GO:0007049//cell cycle;GO:0016567//protein ubiquitination;GO:0030334//regulation of cell migration;GO:0042787//protein ubiquitination involved in ubiquitin-dependent protein catabolic process;GO:0061025//membrane fusion;GO:0070936//protein K48-linked ubiquitination;GO:0016567//protein ubiquitination;GO:0061025//membrane fusion;GO:0030334//regulation of cell migratio…
chr7	21400582	21401813	54	110	-1.02647	8.88304e-23	ENSGALG00000011153	2.14002e+22	Intron_down	LY75	-	GO:0009897//external side of plasma membrane	GO:0030246//carbohydrate binding	-
chrZ	31921327	31922215	50	104	-1.05658	1.14792e-22	ENSGALG00000015103	3.19173e+23	Intron_down	CCDC171	-	-	-	-
chrZ	33233605	33234315	46	98	-1.09115	1.35554e-22	ENSGALG00000020554	3.3072e+24	Intron_down	ADAMTSL1	-	GO:0005578//proteinaceous extracellular matrix;GO:0031012//extracellular matrix	GO:0004222//metalloendopeptidase activity;GO:0008233//peptidase activity;GO:0008237//metallopeptidase activity;GO:0008270//zinc ion binding;GO:0005515//protein binding	GO:0006508//proteolysis
chr6	27914757	27916000	48	101	-1.07325	1.77913e-22	ENSGALG00000009152	2.79037e+24	Intron_down	ATRNL1	-	GO:0016020//membrane;GO:0016021//integral component of membrane	GO:0004872//receptor activity;GO:0030246//carbohydrate binding;GO:0005515//protein binding	GO:0007275//multicellular organismal development;GO:0007186//G-protein coupled receptor signaling pathway
chr4	84315879	84316807	53	108	-1.02697	1.85164e-22	ENSGALG00000015718	8.43147e+22	Intron_down	CTBP1	ko05200//Pathways in cancer;ko04310//Wnt signaling pathway;ko05220//Chronic myeloid leukemia;ko04330//Notch signaling pathway	GO:0005634//nucleus;GO:0005667//transcription factor complex;GO:0017053//transcriptional repressor complex	GO:0016616//oxidoreductase activity, acting on the CH-OH group of donors, NAD or NADP as acceptor;GO:0048037//cofactor binding;GO:0051287//NAD binding;GO:0004616//phosphogluconate dehydrogenase (decarboxylating) activity;GO:0005515//protein binding;GO:0019904//protein domain specific binding;GO:0008134//transcription factor binding;GO:0070491//repressing transcription factor binding;GO:0001106//R…	GO:0008152//metabolic process;GO:0055114//oxidation-reduction process;GO:0006098//pentose-phosphate shunt;GO:0000122//negative regulation of transcription from RNA polymerase II promoter;GO:0051726//regulation of cell cycle;GO:0034401//regulation of transcription by chromatin organization;GO:0035067//negative regulation of histone acetylation;GO:0090241//negative regulation of histone H4 acetylat…
chr9	5766577	5767762	53	108	-1.02697	1.85164e-22	ENSGALG00000005310	5.69244e+22	Intron_down	CLSTN2	-	GO:0016020//membrane;GO:0016021//integral component of membrane;GO:0045211//postsynaptic membrane	GO:0005509//calcium ion binding	GO:0007156//homophilic cell adhesion
chrZ	52288357	52289281	53	108	-1.02697	1.85164e-22	ENSGALG00000015332	5.21871e+24	Intron_down	CPLX1	-	GO:0031201//SNARE complex	GO:0019905//syntaxin binding;GO:0005326//neurotransmitter transporter activity	GO:0006836//neurotransmitter transport;GO:0030073//insulin secretion;GO:0016079//synaptic vesicle exocytosis
chr6	1832008	1832956	42	92	-1.13124	2.19249e-22	ENSGALG00000001934	1.82983e+20	Intron_down	OPN4-2	-	GO:0016020//membrane;GO:0016021//integral component of membrane;GO:0005886//plasma membrane	GO:0004871//signal transducer activity;GO:0004930//G-protein coupled receptor activity;GO:0009881//photoreceptor activity;GO:0008020//G-protein coupled photoreceptor activity;GO:0005502//11-cis retinal binding	GO:0007165//signal transduction;GO:0007186//G-protein coupled receptor signaling pathway;GO:0007601//visual perception;GO:0007602//phototransduction;GO:0018298//protein-chromophore linkage;GO:0050896//response to stimulus;GO:0016056//rhodopsin mediated signaling pathway;GO:0042752//regulation of circadian rhythm
chrZ	62185960	62186867	51	105	-1.04182	2.95916e-22	ENSGALG00000015630	6.21791e+23	Intron_down	EDIL3	-	GO:0070062//extracellular vesicular exosome;GO:0031982//vesicle	GO:0005509//calcium ion binding;GO:0005515//protein binding	GO:0007155//cell adhesion;GO:0010811//positive regulation of cell-substrate adhesion
chr9	10118777	10119596	54	109	-1.0133	4.58234e-22	ENSGALG00000002612	1.0116e+22	Intron_down	U2SURP	ko03040//Spliceosome	GO:0005634//nucleus	GO:0000166//nucleotide binding;GO:0003676//nucleic acid binding;GO:0003723//RNA binding;GO:0005515//protein binding	GO:0006396//RNA processing
chr14	12994506	12995184	50	103	-1.04264	6.15455e-22	ENSGALG00000002715	1.29948e+21	Intron_down	XPO6	-	GO:0005634//nucleus;GO:0005730//nucleolus;GO:0005737//cytoplasm;GO:0005886//plasma membrane	GO:0008536//Ran GTPase binding;GO:0005488//binding;GO:0005515//protein binding;GO:0008565//protein transporter activity	GO:0006810//transport;GO:0006886//intracellular protein transport;GO:0006611//protein export from nucleus
chr3	46210899	46212438	50	103	-1.04264	6.15455e-22	ENSGALG00000012317	4.62102e+23	Intron_down	ADGB	-	GO:0005622//intracellular;GO:0005737//cytoplasm	GO:0004198//calcium-dependent cysteine-type endopeptidase activity;GO:0005344//oxygen transporter activity;GO:0005506//iron ion binding;GO:0019825//oxygen binding;GO:0020037//heme binding;GO:0005515//protein binding	GO:0006508//proteolysis;GO:0006810//transport;GO:0015671//oxygen transport
chr5	21065397	21066346	48	100	-1.05889	7.31813e-22	ENSGALG00000008000	2.10561e+23	Intron_down	EXT2	-	GO:0016021//integral component of membrane;GO:0031227//intrinsic component of endoplasmic reticulum membrane;GO:0070062//extracellular vesicular exosome;GO:0016020//membrane;GO:0005783//endoplasmic reticulum;GO:0005794//Golgi apparatus	GO:0016758//transferase activity, transferring hexosyl groups;GO:0046982//protein heterodimerization activity;GO:0008375//acetylglucosaminyltransferase activity;GO:0016757//transferase activity, transferring glycosyl groups;GO:0015020//glucuronosyltransferase activity;GO:0042803//protein homodimerization activity	GO:0006024//glycosaminoglycan biosynthetic process;GO:0015012//heparan sulfate proteoglycan biosynthetic process;GO:0001503//ossification;GO:0033692//cellular polysaccharide biosynthetic process;GO:0015014//heparan sulfate proteoglycan biosynthetic process, polysaccharide chain biosynthetic process;GO:0030154//cell differentiation;GO:0001707//mesoderm formation
chr6	27047522	27049115	53	107	-1.01355	9.57551e-22	ENSGALG00000008933	2.70433e+24	Intron_down	CASP7	ko05010//Alzheimer's disease;ko04210//Apoptosis;ko05133//Pertussis	GO:0005737//cytoplasm	GO:0004197//cysteine-type endopeptidase activity;GO:0008233//peptidase activity;GO:0008234//cysteine-type peptidase activity;GO:0016787//hydrolase activity;GO:0005515//protein binding;GO:0004190//aspartic-type endopeptidase activity;GO:0097153//cysteine-type endopeptidase activity involved in apoptotic process	GO:0006508//proteolysis;GO:0006915//apoptotic process;GO:0097194//execution phase of apoptosis;GO:0007507//heart development;GO:0043525//positive regulation of neuron apoptotic process;GO:0001836//release of cytochrome c from mitochondria;GO:0009411//response to UV;GO:0097194//execution phase of apoptosis;GO:0016485//protein processing
[truncated: 162 more rows]
