# Supplementary material for: Genome methylation and regulatory functions for hypoxic adaptation in Tibetan chicken embryos
Source: PeerJ. 2017 Oct 6;5:e3891. doi: 10.7717/peerj.3891 (PMC5633026; doi:10.7717/peerj.3891)
Supplement: Table S6 [file peerj-05-3891-s010.xlsx]

## Sheet: Sheet1
Table S6. Gene Ontology (GO) functional analysis of differentially methylated genes (DMGs)
Gene Ontology term	Category	Cluster frequency	Genome frequency of use	P-value	Q-value	genes
MHC class I protein complex	cellular component	9 of 549 in the list	47 of 18855 in the genome	7.15e-06	0.000719767	HFE,HLA-C,HLA-E,HLA-A,MR1,HLA-G,AZGP1,HLA-B,HLA-F
synapse	cellular component	34 of 549 in the list	578 of 18855 in the genome	8.82e-05	0.00532728	GSG1L,OLFM3,KCTD8,SYNE1,CHRNA3,STXBP5,UNC13B,DLGAP1,USH1C,ARHGAP32,GPHN,SORCS3,SYT4,KCNMA1,CLSTN2,PCDH15,NRXN1,SRGAP2,TLN2,NEURL1,CPLX1,GRIA2,DNM3,COL4A5,GRIN2A,ADAM10,GABRR2,COPS4,CAMK2D,ANK3,SOS1,ADD1,NLGN1,UTRN
basal part of cell	cellular component	7 of 549 in the list	43 of 18855 in the genome	0.00022	0.00949143	DOCK7,ANK3,BMPR2,ITGA2,HFE,ADCY10,DST
cell-cell junction	cellular component	23 of 549 in the list	362 of 18855 in the genome	0.00041	0.0130337	TLN2,TJP1,DPP4,FBF1,SPECC1L,TBCD,CGNL1,ADD3,TEC,THEMIS,PTPRK,PLEKHA7,CD2AP,CLDN16,STX2,SHROOM3,YWHAH,FAT1,AKAP6,PDZD2,CTNNA3,ANK3,CAMK2D
actin cytoskeleton	cellular component	23 of 549 in the list	413 of 18855 in the genome	0.0024	0.0414171	FYB1,CDC42EP3,CD2AP,CAPZA1,ABLIM1,MACF1,ARHGAP32,DST,KNTC1,ADD1,CTNNA3,TTN,PARVA,AIF1L,TLN2,SPECC1L,TPM4,STK17B,BMF,CGNL1,MYO5A,FMN1,KALRN
ATP binding	molecular function	79 of 555 in the list	1623 of 18508 in the genome	1.12e-05	0.00173413	HSPA4L,PIP5K1B,NADK2,MERTK,STK17B,ACSL3,CARS,CHD1,RTCA,ROS1,RYK,DDX50,NAV2,CDC7,GRK5,RPS6KA5,CAMK2D,OLA1,ABCC1,TTN,DST,DDX41,TDRD9,TRAP1,SMARCA2,BMPR2,ABCA1,XRCC5,AKT3,KIF26A,ULK2,ALK,UBE2B,SGK2,ADCY10,ITPKA,AK4,CDKL2,DNAH9,BRSK2,MAST4,UBE2K,PRKCB,ATR,FPGT-TNNI3K,MCM3,KIAA0232,KALRN,TEC,STRADB,CMPK2,UBA6,MAP3K7,KIF24,SPATA5,ORC4,DHX35,GSS,TNNI3K,KIF5C,RBKS,SYNE1,PGBD3,TRPM6,MAP3K5,WRN,MYO5A,TRIB2…
cytoskeletal protein binding	molecular function	45 of 555 in the list	770 of 18508 in the genome	1.58e-05	0.00163091	CLMN,SHROOM3,SHTN1,PTPRT,CEP350,ABLIM1,KIFAP3,PROM1,MAST2,SNTG2,KCNMA1,SYNE1,PARVA,KIF5C,ENSG00000256500,SYNE2,TPM4,MYO5A,USH1C,LRPPRC,KIF26A,FMN1,PLS1,EPB41L4A,KIF24,CDC42EP3,YWHAH,NEXN,CAPZA1,MACF1,DST,PHACTR3,JAKMIP3,ADD1,UTRN,TTN,TNNI3K,CAMK2D,ANK3,CLASP1,BLOC1S6,TLN2,AIF1L,TBCD,ADD3
protein tyrosine kinase activity	molecular function	32 of 555 in the list	499 of 18508 in the genome	4.87e-05	0.00251346	ROS1,STRADB,TEC,KALRN,RYK,PRKCB,STK17B,FPGT-TNNI3K,MERTK,CAMK2D,TNNI3K,TTN,MAP3K7,CDC7,RPS6KA5,GRK5,AKT3,ALK,ULK2,MAP3K5,RPS6KA6,TRIB2,SGK2,BMPR2,CDKL2,BMP2K,ROR2,JAK2,BRSK2,MAST2,MAST4,BMPR1B
GTPase activator activity	molecular function	19 of 555 in the list	271 of 18508 in the genome	0.00056	0.01858	ARHGAP32,PLCB1,RGS7,RGS6,SOS1,FAM13B,ARHGAP15,RALGAPA2,TBCD,ARHGAP18,RIN3,DEPDC5,NF1,AGFG1,TBC1D12,SRGAP2,TBC1D32,RASA2,RAP1GDS1
protein complex binding	molecular function	41 of 555 in the list	839 of 18508 in the genome	0.00151	0.0400797	NEXN,FCGRT,MACF1,NIPBL,GNA14,KIF24,CD2AP,EDIL3,UTRN,TTN,ADD1,CLASP1,DST,HRG,ADAM10,ITGA2,JAKMIP3,ATR,TLN2,BLOC1S6,AIF1L,CENPH,FN1,THRA,TRIM23,CEP350,SMYD3,PTPRF,PHIP,FYB1,GNAS,MAST2,KIF5C,SYNE1,FMN1,KIF26A,PLS1,MYO5A,WRN,PGBD3,LRPPRC
cellular response to oxygen-containing compound	biological process	36 of 531 in the list	761 of 17708 in the genome	0.00479	0.146045	GNG4,ATP6V1C2,OSER1,SOS1,ADD1,TNIP3,PDE3B,GCG,TJP1,PRKCB,CMPK2,NEURL1,RRAGB,RYR3,STRADB,FANCC,GNAS,PHIP,SMYD3,FGF8,AKAP6,JAK2,KCNQ1,PPAT,PDGFC,RRAGA,DENND4C,PPARGC1A,MAP3K5,CTR9,MYO5A,ABCA1,XRCC5,PTPRK,CALCRL,UBE2B
angiogenesis	biological process	16 of 531 in the list	286 of 17708 in the genome	0.01283	0.222864	MAP3K7,FGF8,LRP5,HIF1A,SHB,EREG,EGF,NRXN1,PDE3B,EDNRA,HRG,AGGF1,PARVA,NRXN3,FN1,CALCRL
heart contraction	biological process	5 of 531 in the list	48 of 17708 in the genome	0.0141	0.231113	CAMK2D,TTN,ATG5,RNLS,KCNQ1
heart process	biological process	5 of 531 in the list	51 of 17708 in the genome	0.01799	0.259723	CAMK2D,TTN,ATG5,RNLS,KCNQ1
blood circulation	biological process	16 of 531 in the list	298 of 17708 in the genome	0.01823	0.258902	LRP5,GUCY1B3,RNLS,EDNRA,ATG5,KCNQ1,CAMK2D,NPR3,KCNMA1,TTN,CORIN,BMPR2,TJP1,RAP1GDS1,NAV2,MRVI1
cardiac muscle fiber development	biological process	2 of 531 in the list	8 of 17708 in the genome	0.02229	0.284998	NEXN,TTN
blood vessel development	biological process	21 of 531 in the list	438 of 17708 in the genome	0.02398	0.294515	PDE3B,TCF7L2,NRXN1,EGF,EREG,SPINT1,EDNRA,HRG,FGF8,MAP3K7,SHB,HIF1A,LRP5,GLMN,CALCRL,FN1,NF1,NRXN3,AGGF1,PARVA,BMPR2
response to UV	biological process	8 of 531 in the list	120 of 17708 in the genome	0.02808	0.324745	CASP7,ATR,TROVE2,PTPRK,CIRBP,UBE2B,PGBD3,WRN
blood vessel morphogenesis	biological process	18 of 531 in the list	369 of 17708 in the genome	0.0301	0.333934	EDNRA,HRG,PDE3B,NRXN1,EGF,EREG,SHB,HIF1A,LRP5,MAP3K7,FGF8,CALCRL,GLMN,NF1,FN1,NRXN3,PARVA,AGGF1
cellular response to fatty acid	biological process	3 of 531 in the list	25 of 17708 in the genome	0.0378	0.361421	GNAS,XRCC5,PPARGC1A
